# Supplementary material
Source: MDPI journal article supplement (https://www.mdpi.com/2073-8994/16/3/314)
Supplement: s1 [file s1]

# ***Electronic Supplementary Information***

## **Unsymmetrical and $C_3$ -Symmetrical Partially Fluorinated Hexaarylbenzenes: Effect of Terminal Alkoxy Chain Length on Photophysical and Thermophysical Behavior**

Yizhou Wang, Shigeyuki Yamada \*, Tomohiro Yasuda, Tsutomu Konno

Faculty of Molecular Chemistry and Engineering, Kyoto Institute of Technology,  
Matsugasaki, Sakyo-ku, Kyoto 606-8585, Japan; d2871003@edu.kit.ac.jp (Y.W.);  
myasui@kit.ac.jp (M.Y.); konno@kit.ac.jp (T.K.)

\* Correspondence: Shigeyuki Yamada (syamada@kit.ac.jp)

|                           | <b>Table of Contents</b> |      |
|---------------------------|--------------------------|------|
| NMR spectrum              | .....                    | S-2  |
| Phase transition behavior | .....                    | S-17 |
| Photophysical behavior    | .....                    | S-27 |
| Theoretical study         | .....                    | S-32 |
| Cartesian coordinate      | .....                    | S-33 |

## NMR spectrum

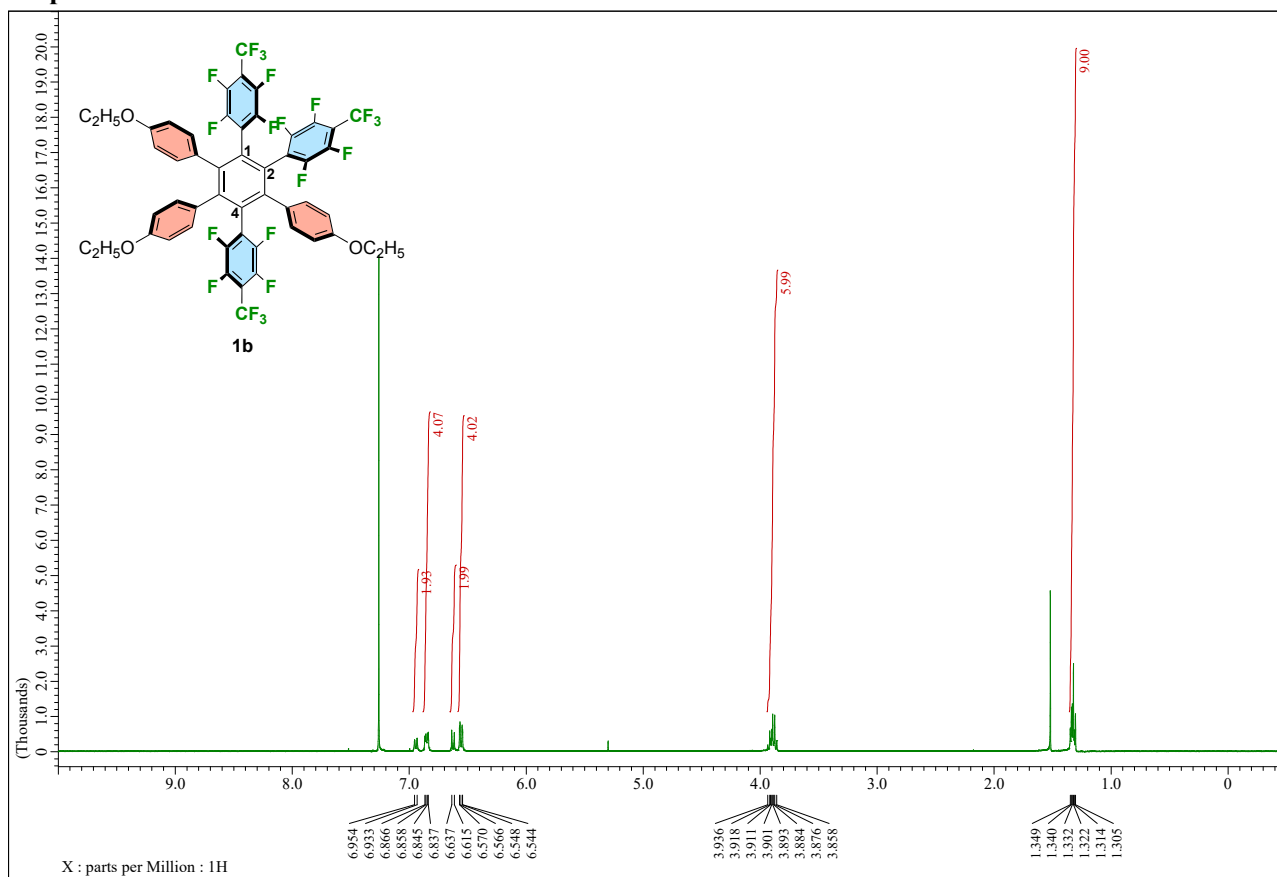

Figure S1. <sup>1</sup>H NMR spectrum of **1b** (400 MHz, CDCl<sub>3</sub>)

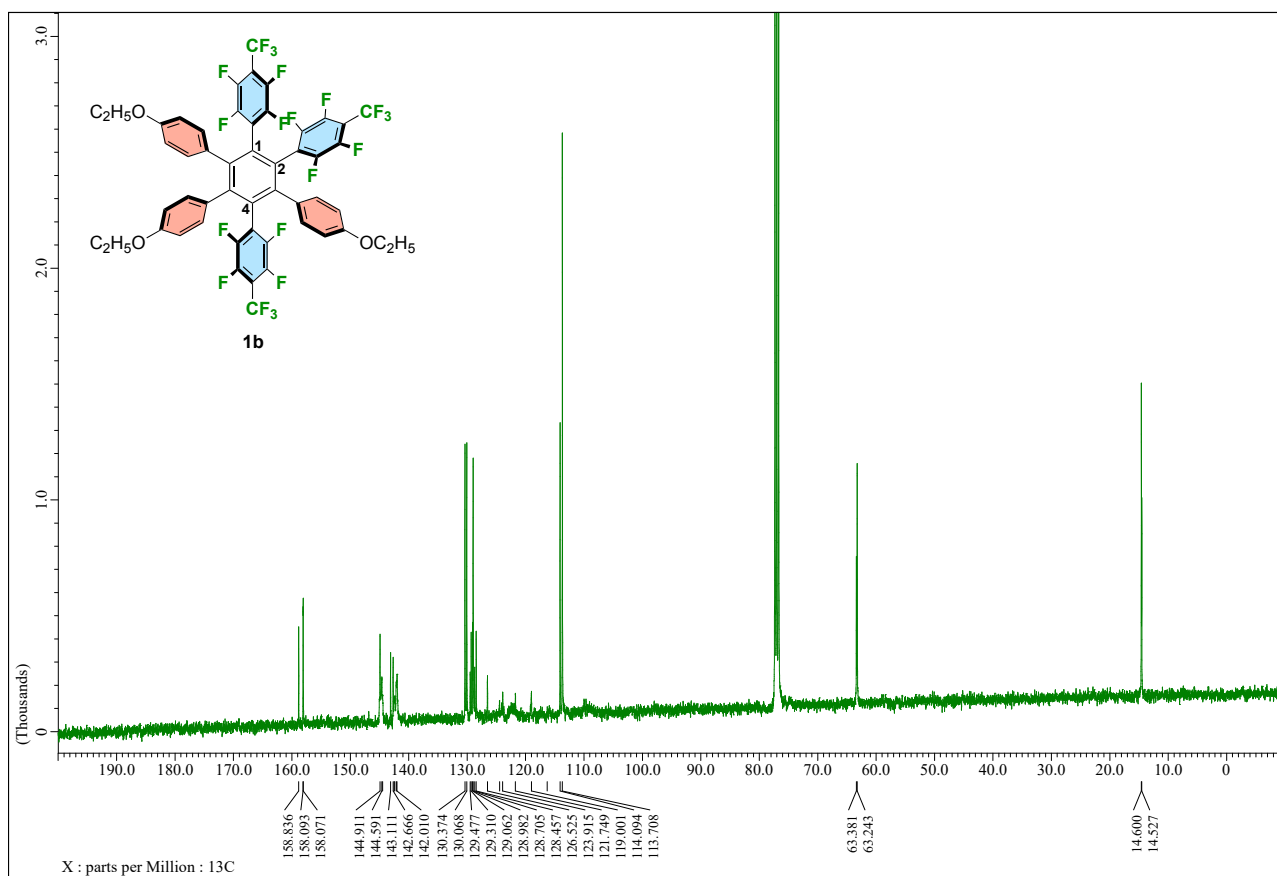

Figure S2. <sup>13</sup>C NMR spectrum of **1b** (100 MHz, CDCl<sub>3</sub>)

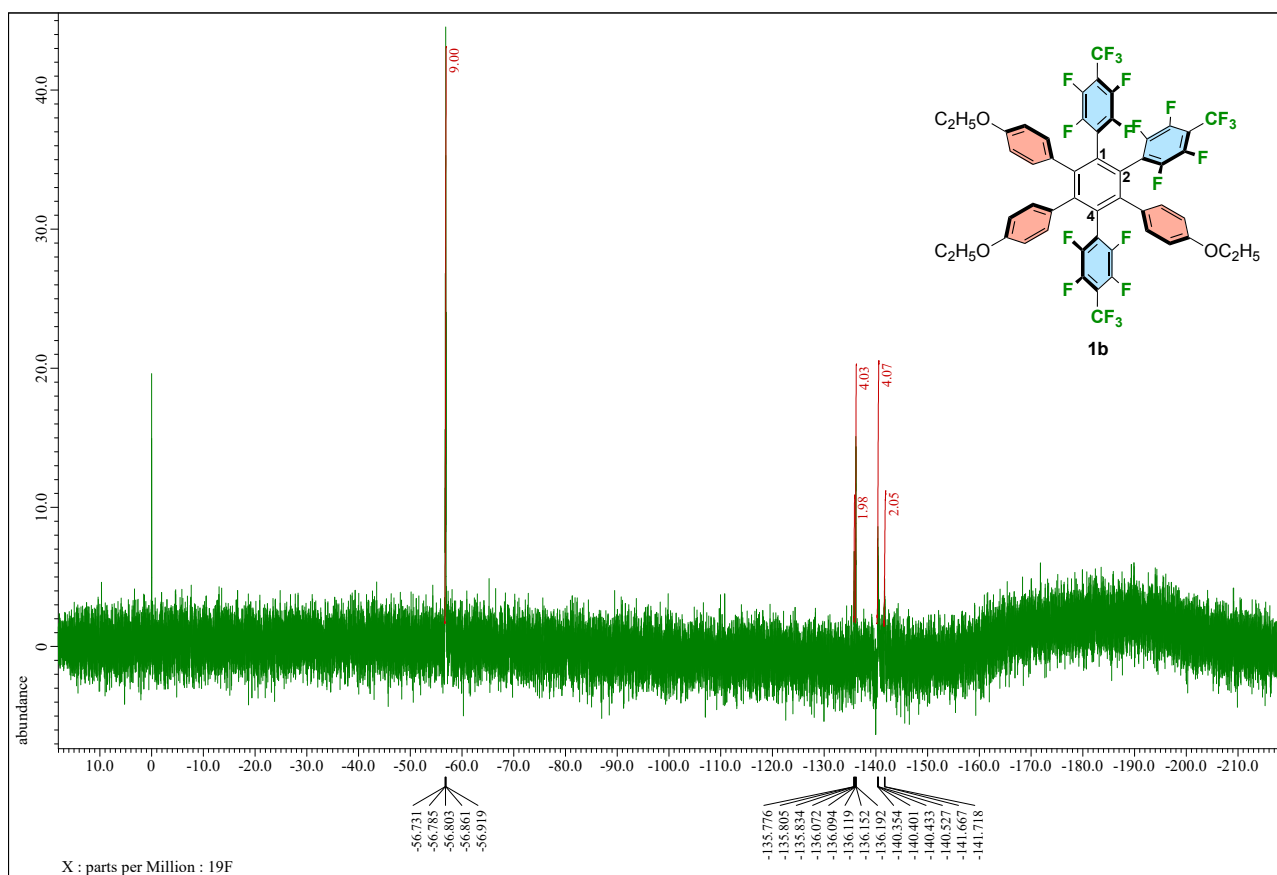

**Figure S3.** <sup>19</sup>F NMR spectrum of **1b** (376 MHz, CDCl<sub>3</sub>)

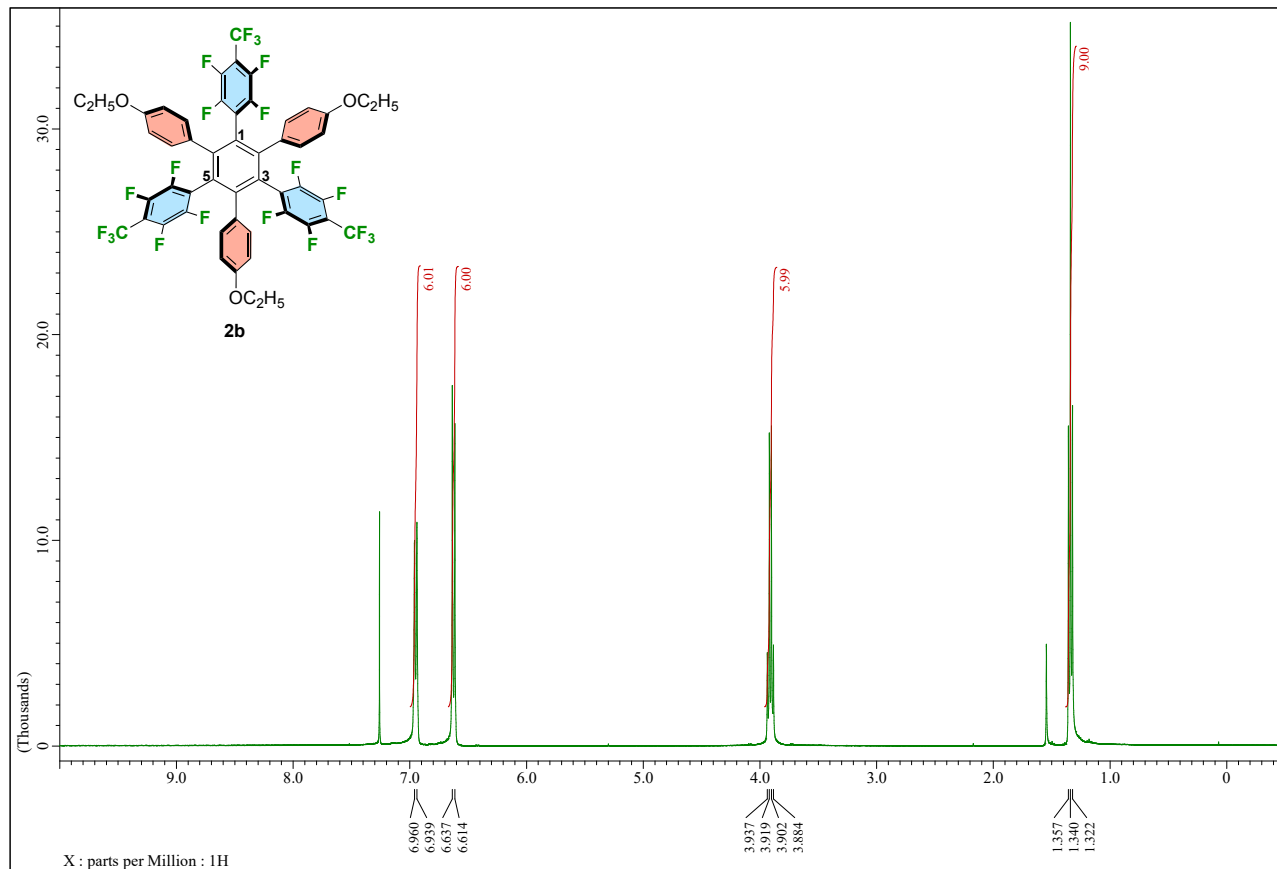

**Figure S4.** <sup>1</sup>H NMR spectrum of **2b** (400 MHz, CDCl<sub>3</sub>)

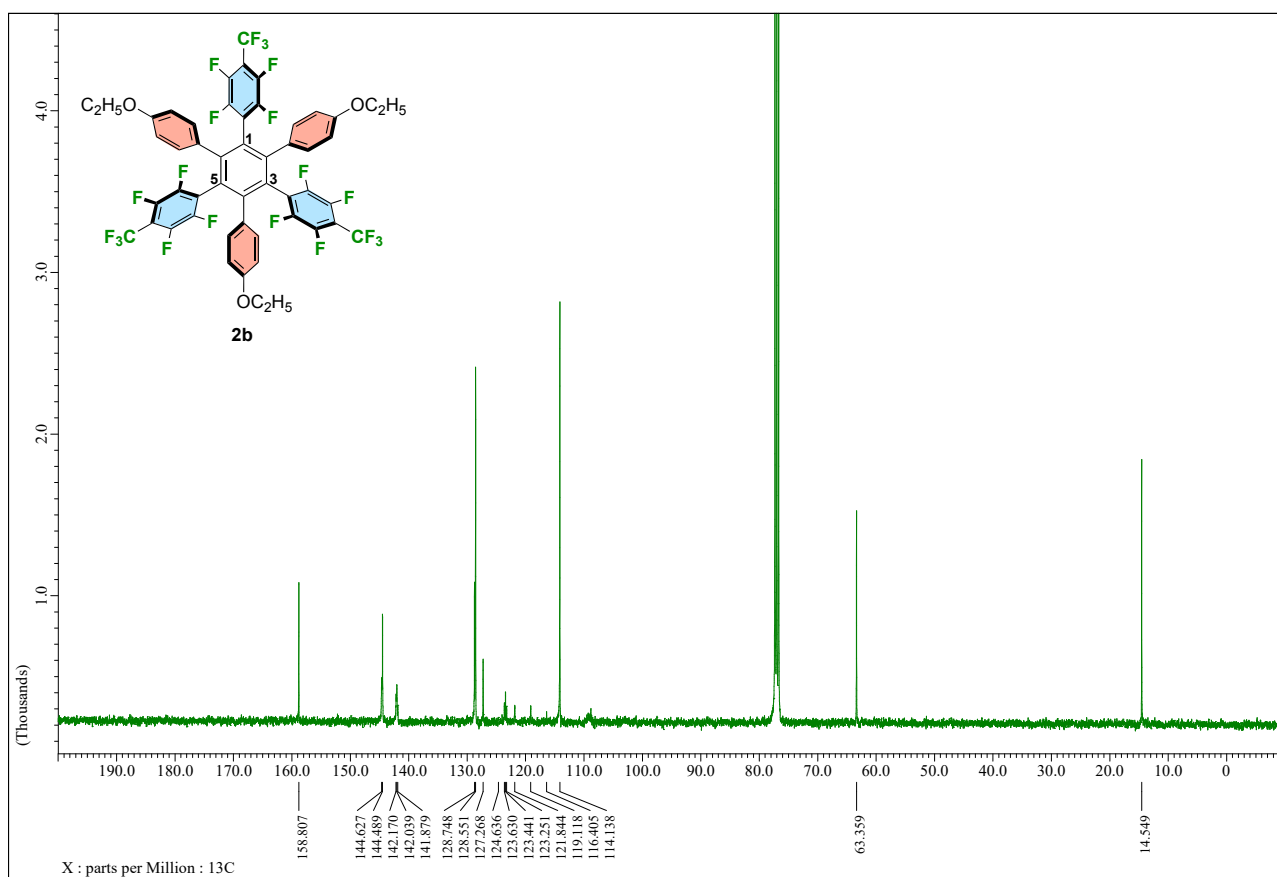

**Figure S5.**  $^{13}\text{C}$  NMR spectrum of **2b** (100 MHz,  $\text{CDCl}_3$ )

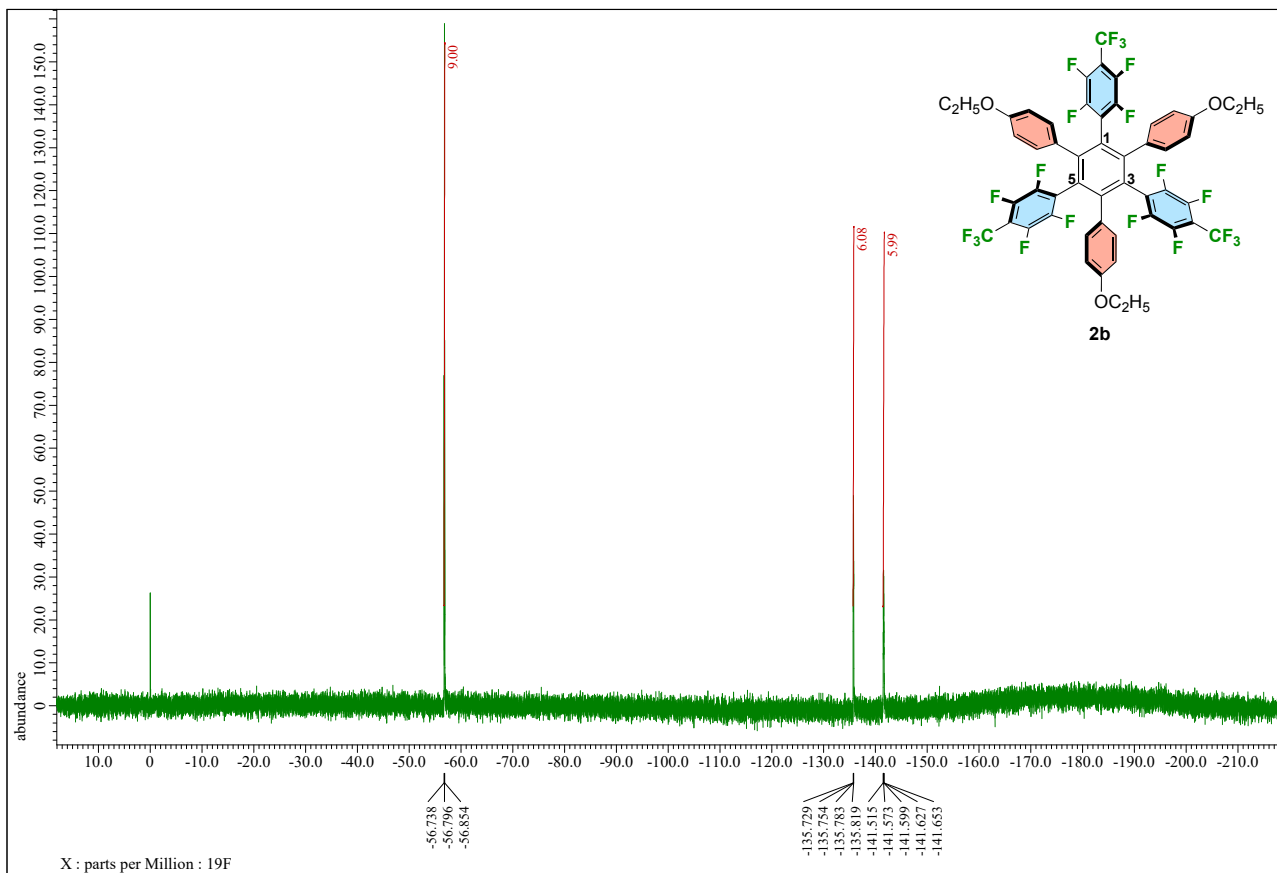

**Figure S6.**  $^{19}\text{F}$  NMR spectrum of **2b** (376 MHz,  $\text{CDCl}_3$ )



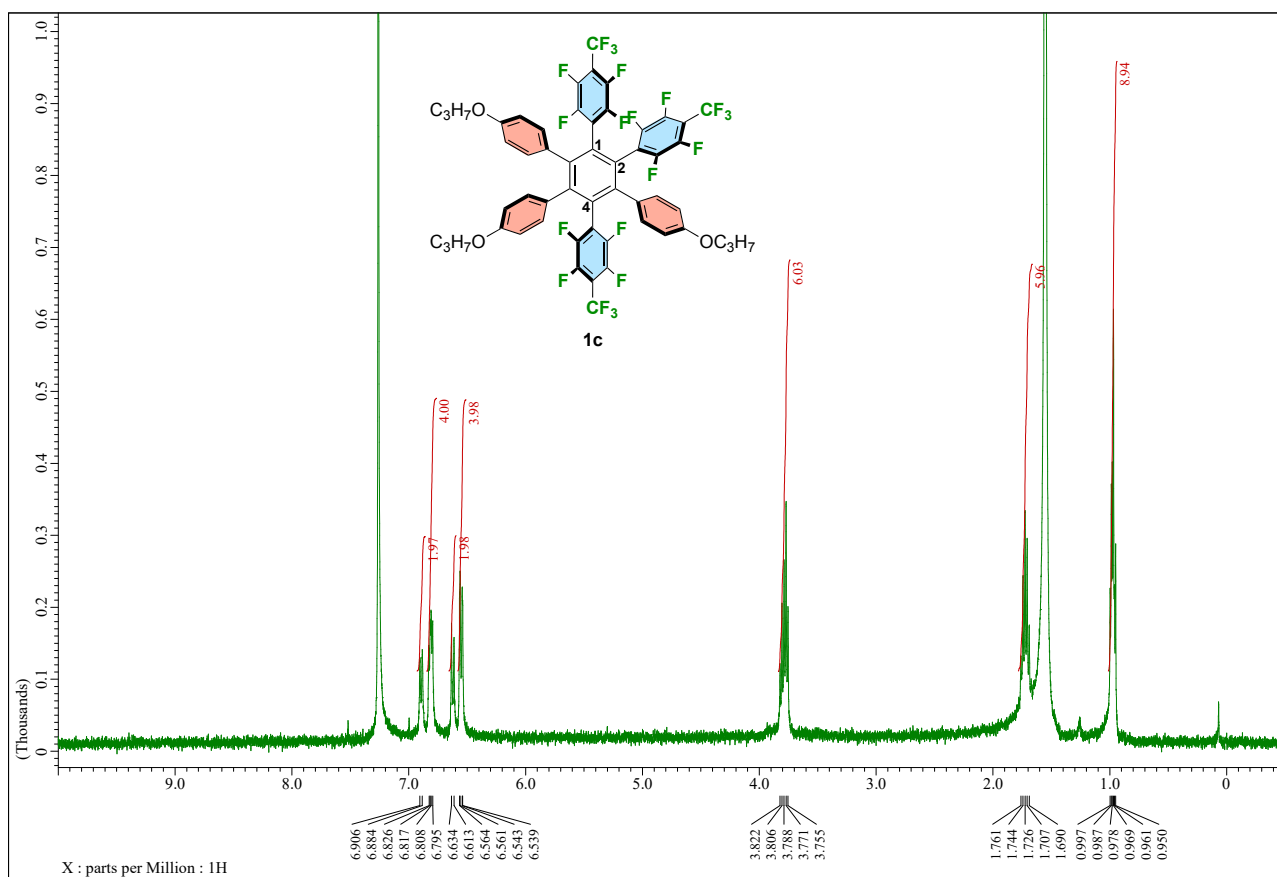

**Figure S7.** <sup>1</sup>H NMR spectrum of **1c** (400 MHz, CDCl<sub>3</sub>)

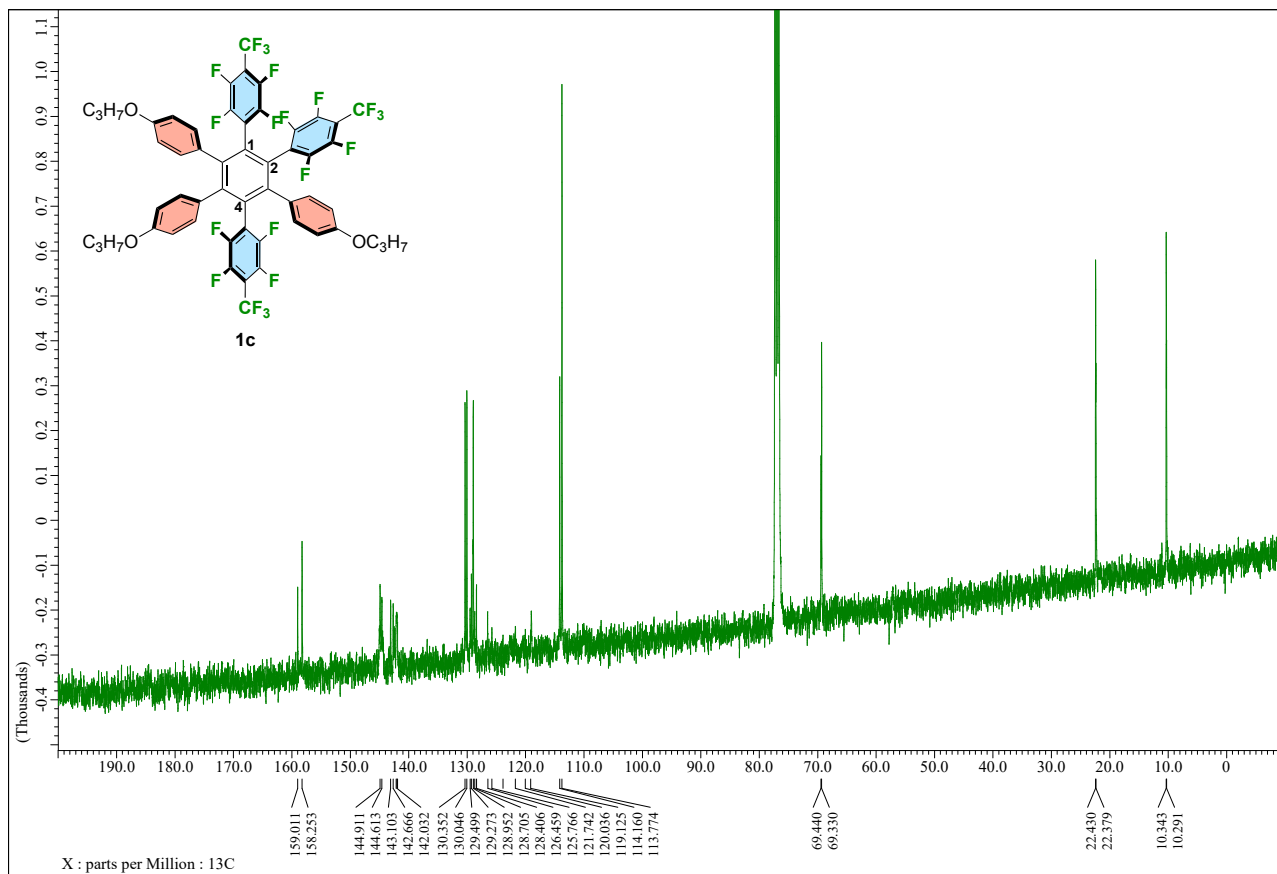

**Figure S8.** <sup>13</sup>C NMR spectrum of **1c** (100 MHz, CDCl<sub>3</sub>)

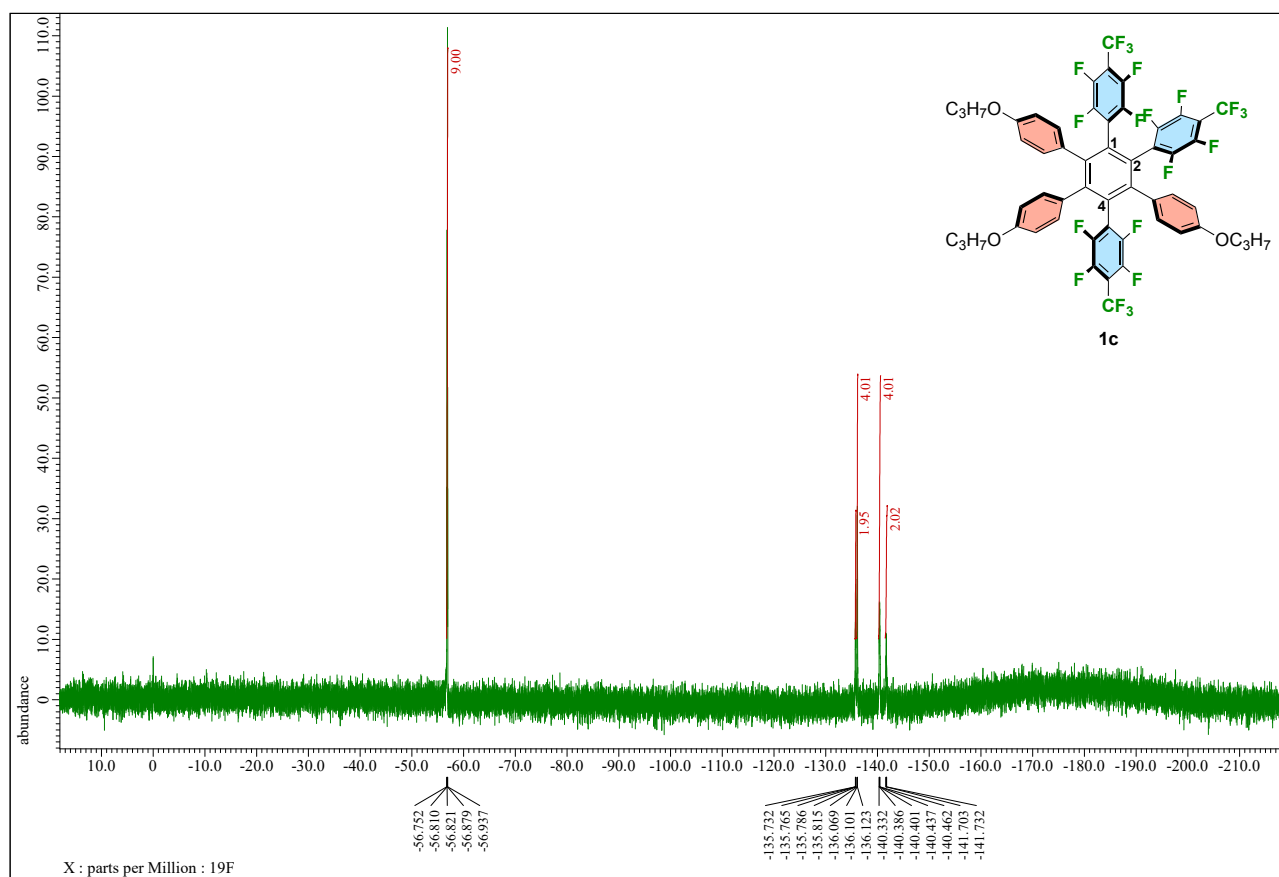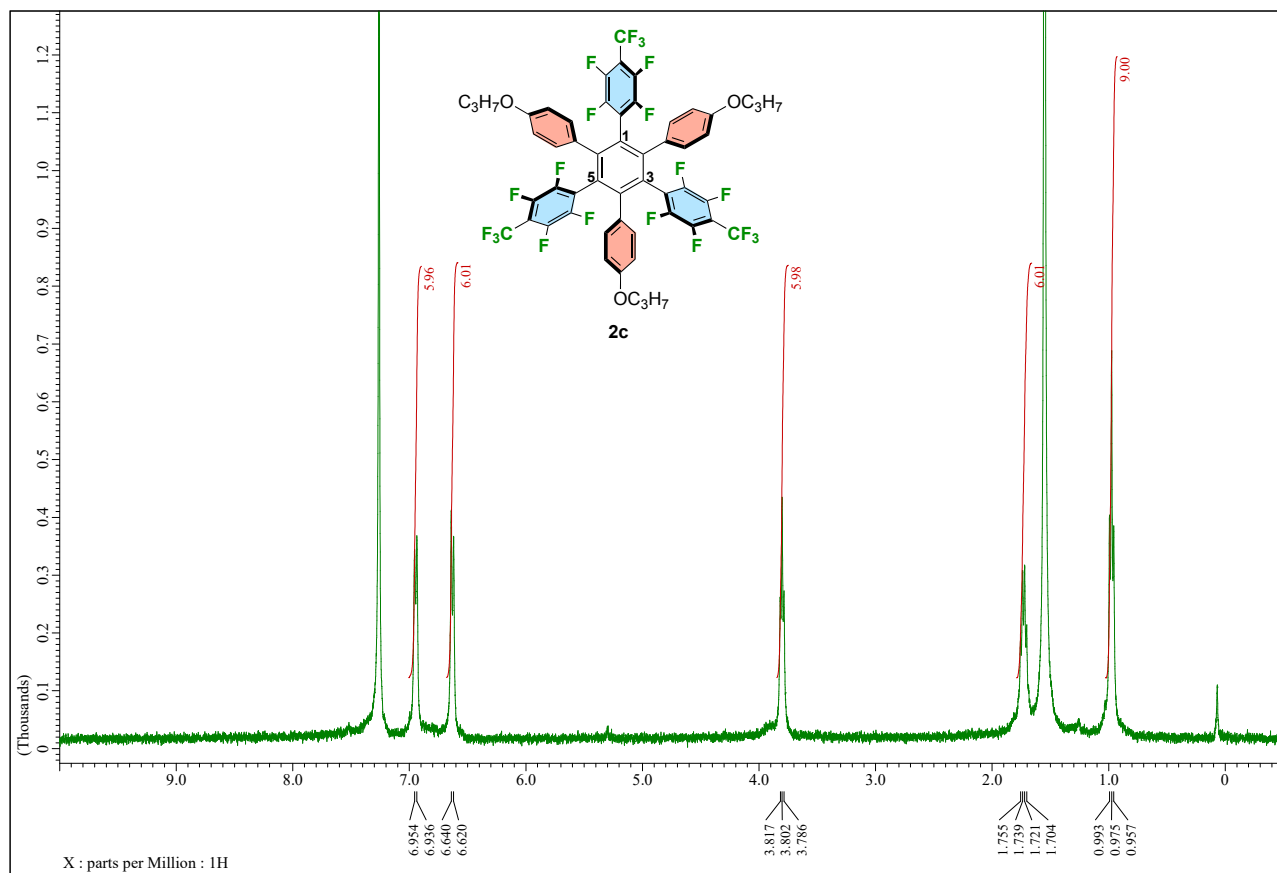

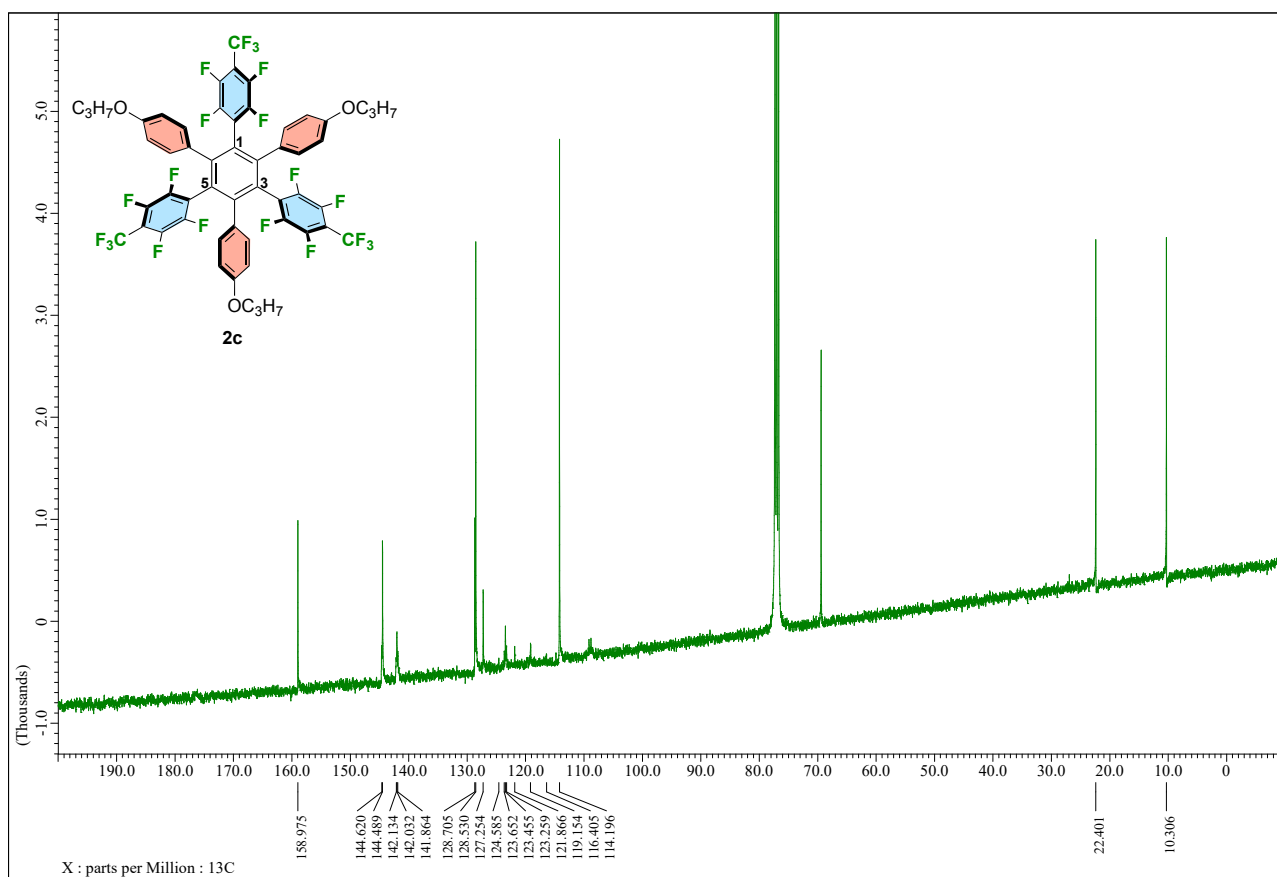

Figure S11.  $^{13}\text{C}$  NMR spectrum of **2c** (100 MHz,  $\text{CDCl}_3$ )

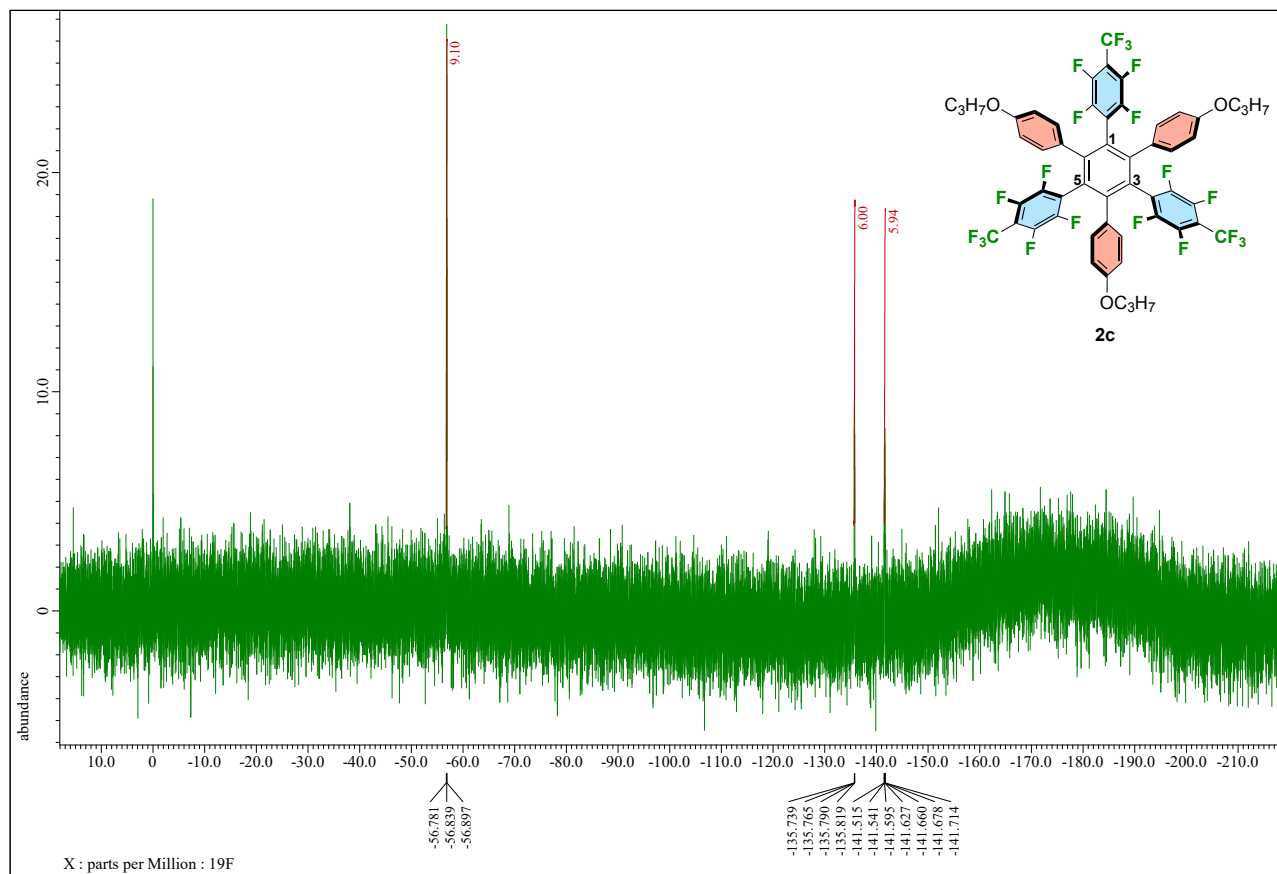

Figure S12.  $^{19}\text{F}$  NMR spectrum of **2c** (376 MHz,  $\text{CDCl}_3$ )

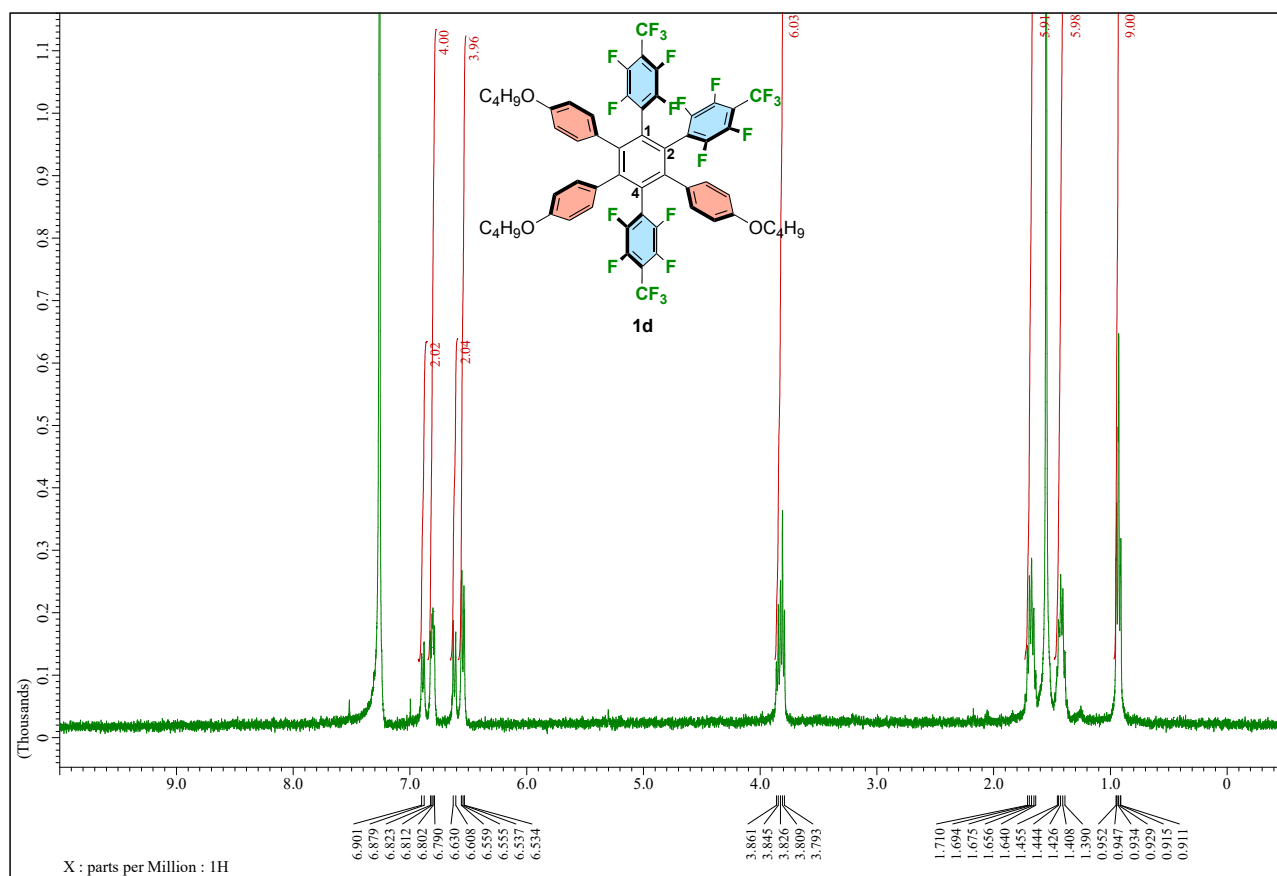

Figure S13. <sup>1</sup>H NMR spectrum of **1d** (400 MHz, CDCl<sub>3</sub>)

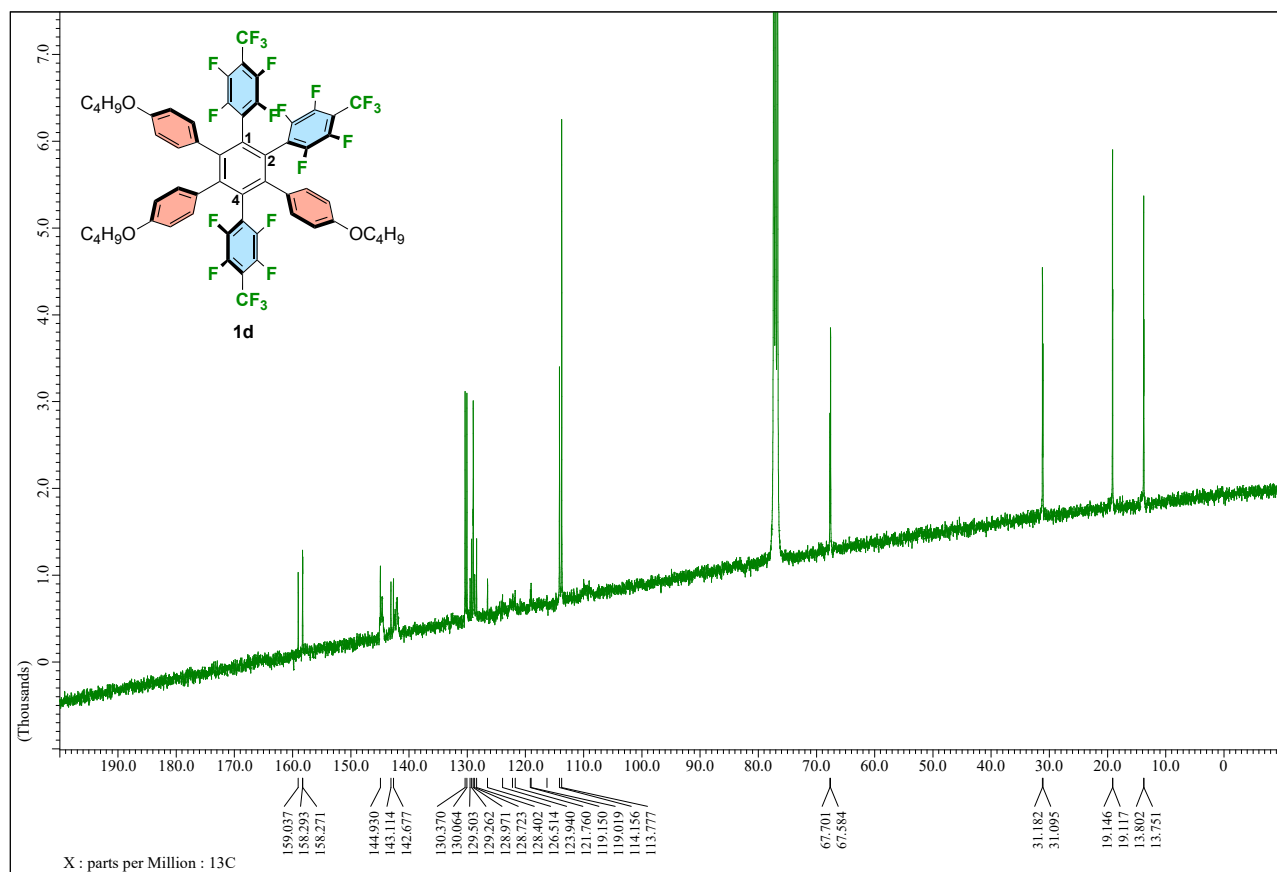

Figure S14. <sup>13</sup>C NMR spectrum of **1d** (100 MHz, CDCl<sub>3</sub>)

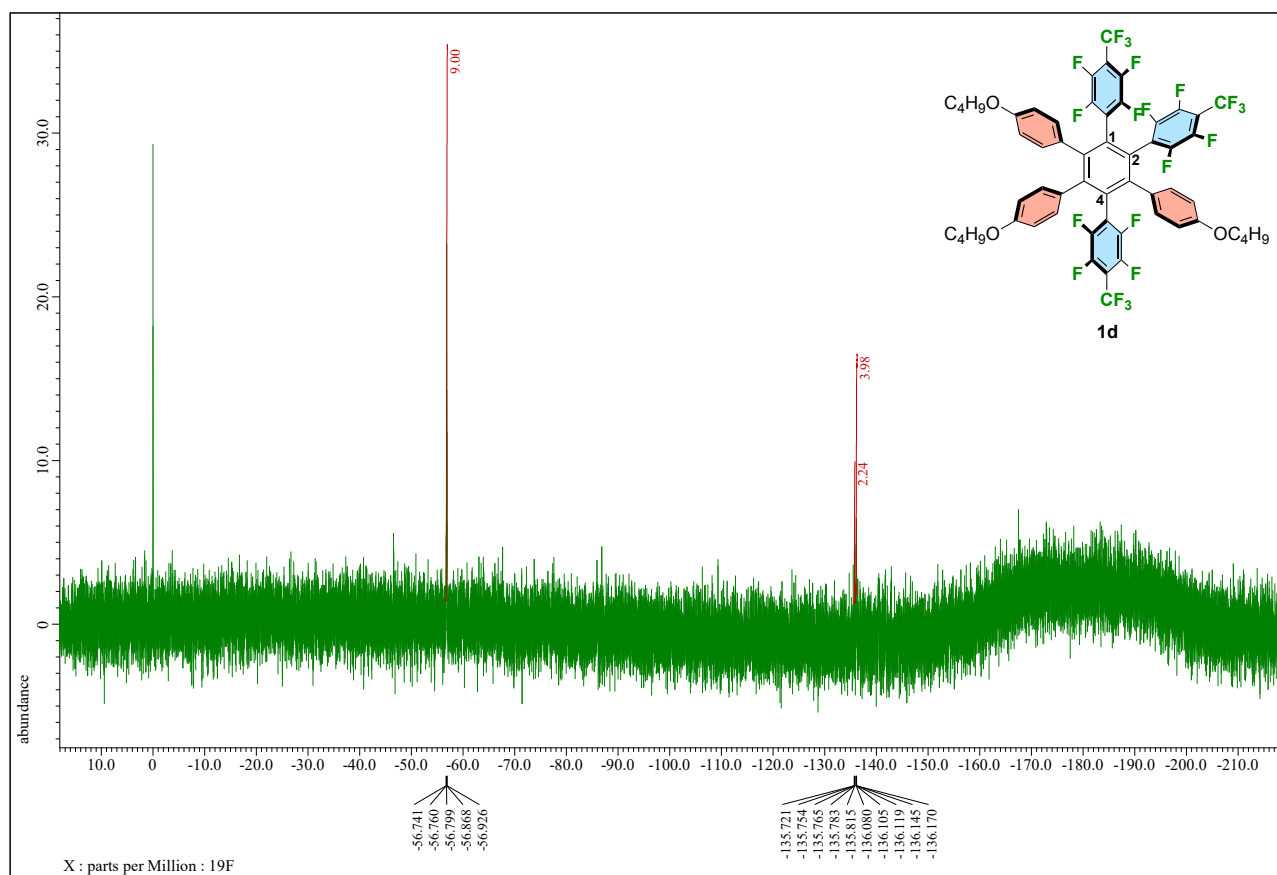

Figure S15. <sup>19</sup>F NMR spectrum of **1d** (376 MHz, CDCl<sub>3</sub>)

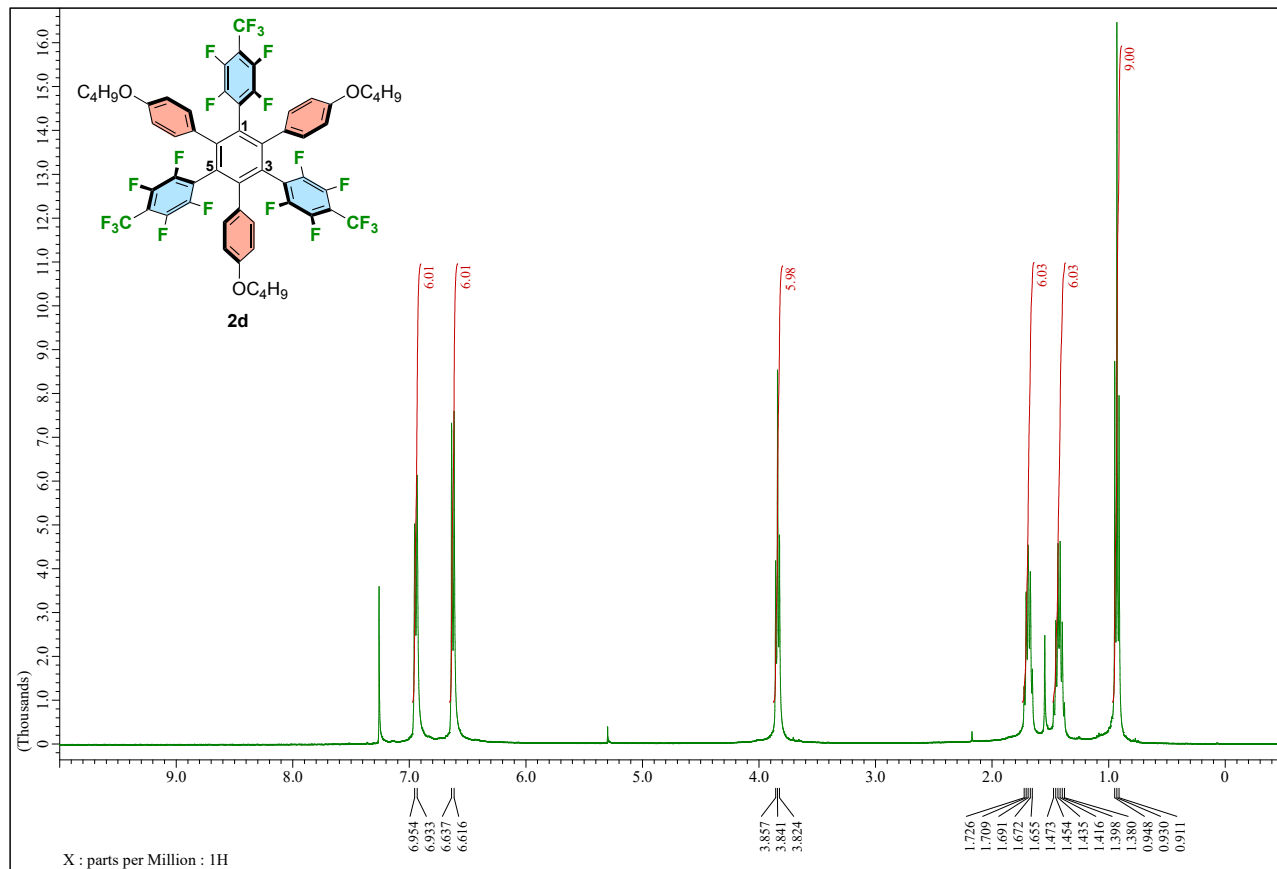

Figure S16. <sup>1</sup>H NMR spectrum of **2d** (400 MHz, CDCl<sub>3</sub>)

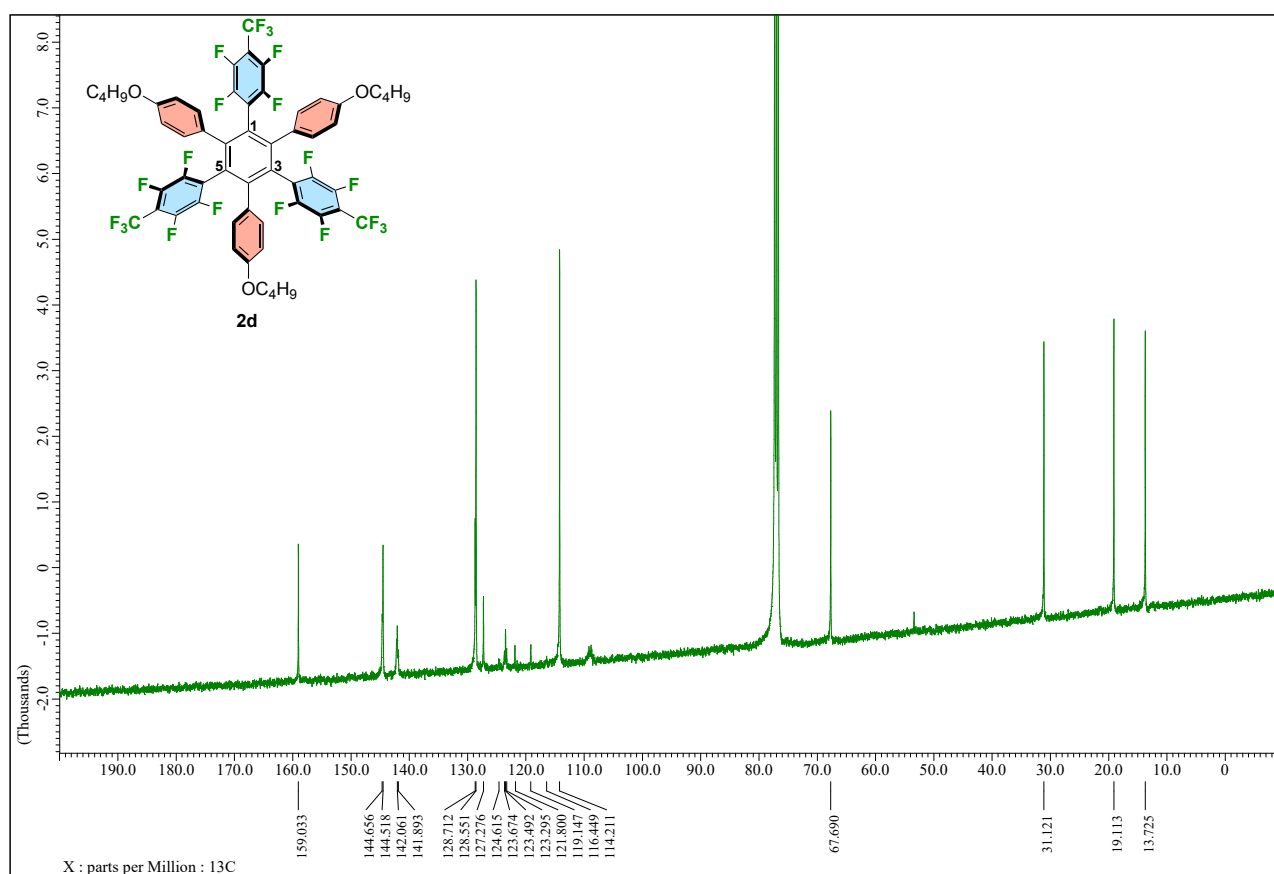

**Figure S17.**  $^{13}\text{C}$  NMR spectrum of **2d** (100 MHz,  $\text{CDCl}_3$ )

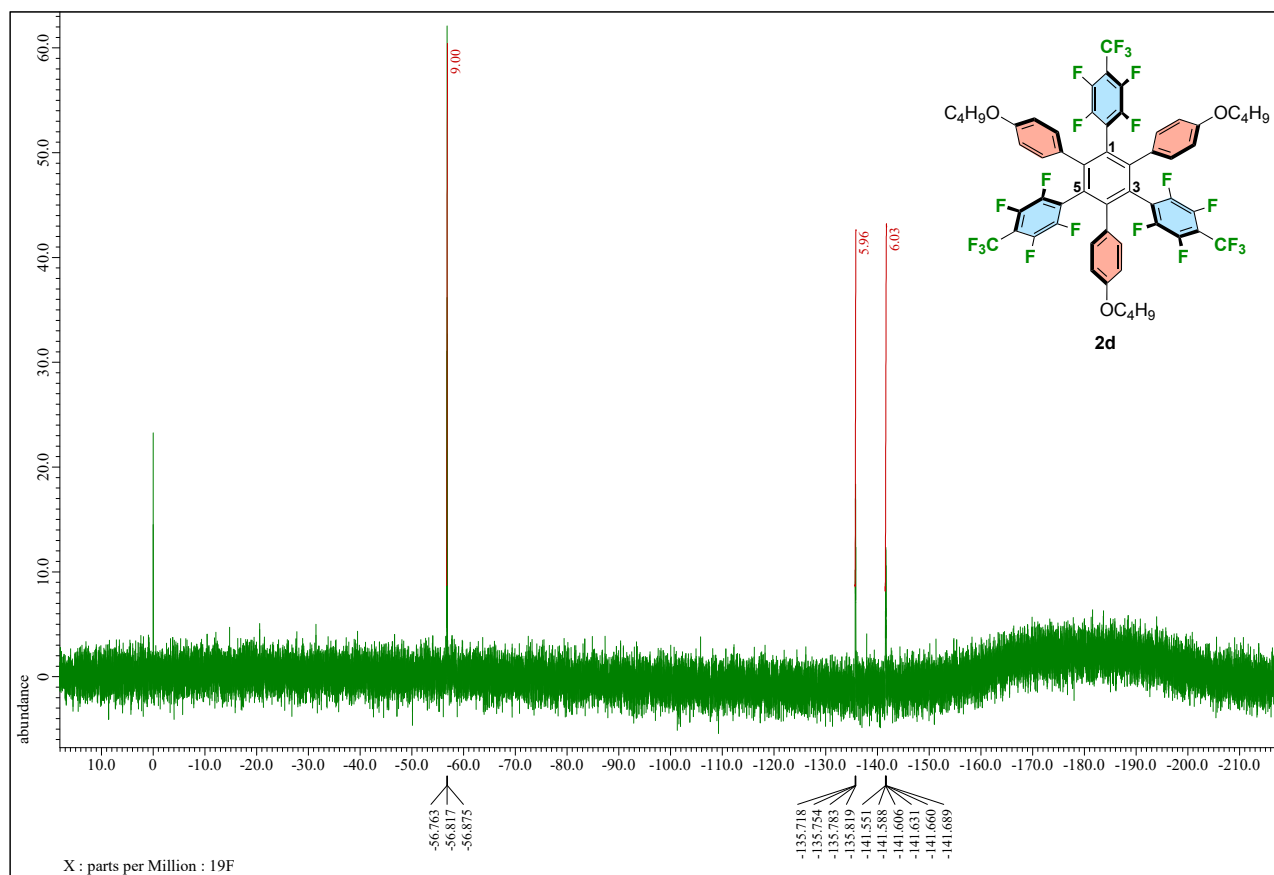

**Figure S18.**  $^{19}\text{F}$  NMR spectrum of **2d** (376 MHz,  $\text{CDCl}_3$ )

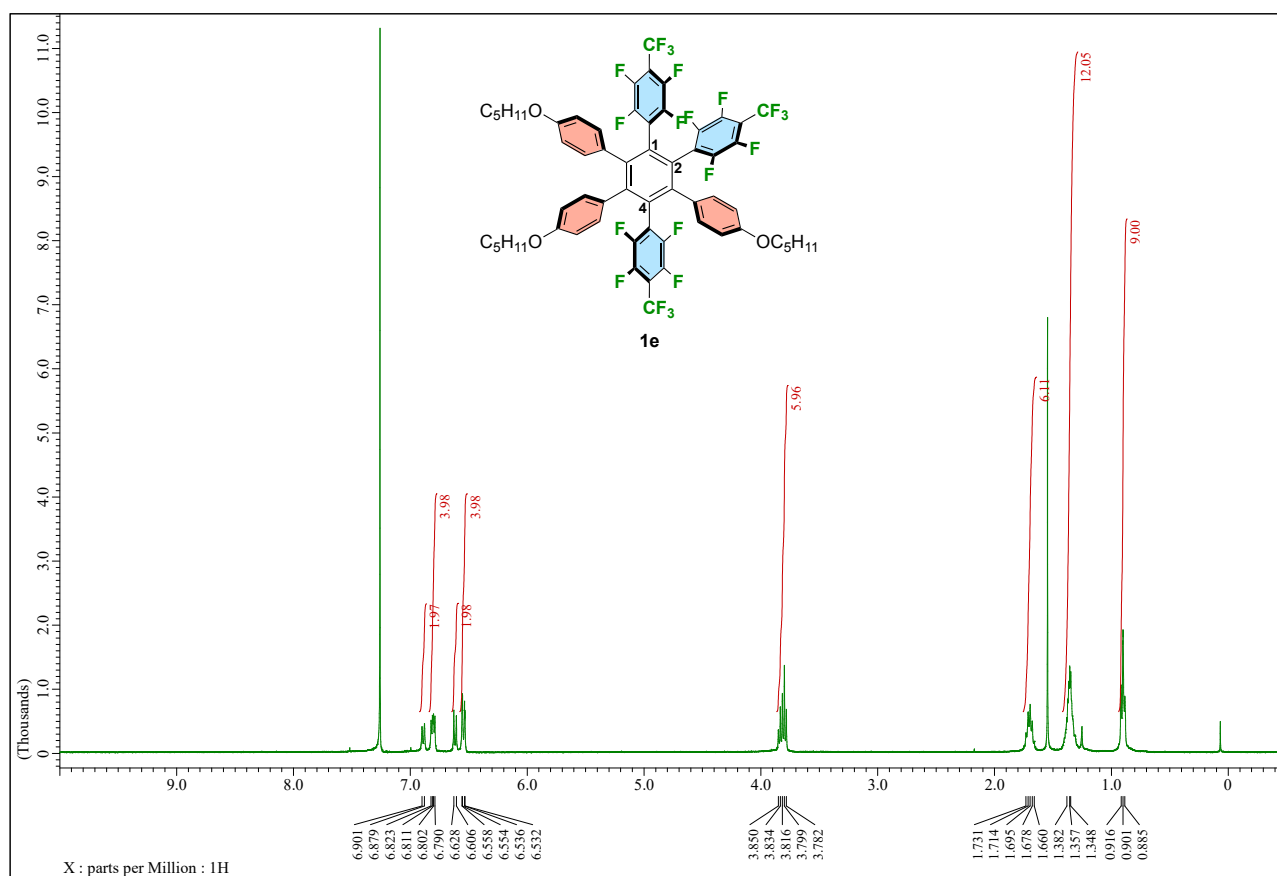

**Figure S19. <sup>1</sup>H NMR spectrum of **1e** (400 MHz, CDCl<sub>3</sub>)**

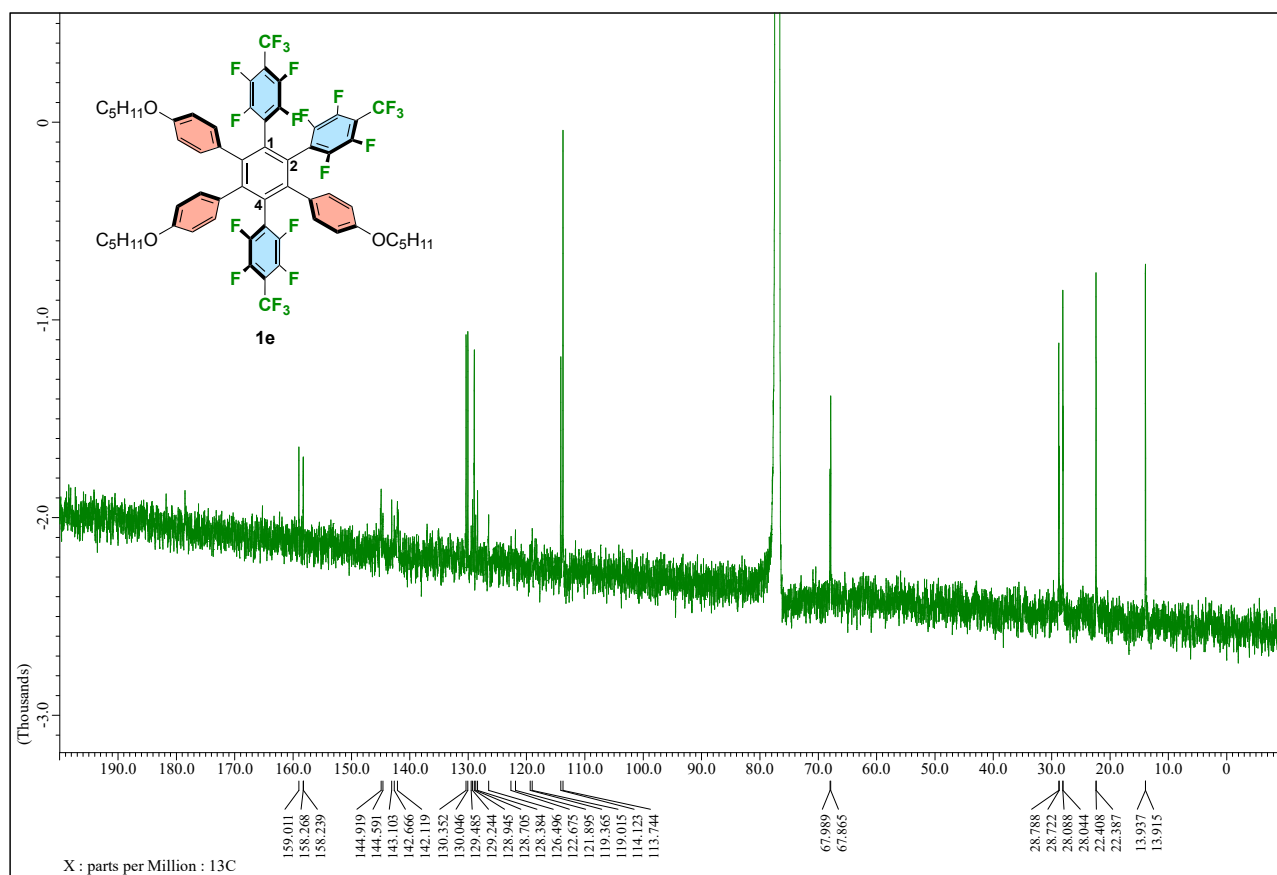

**Figure S20. <sup>13</sup>C NMR spectrum of **1e** (100 MHz, CDCl<sub>3</sub>)**

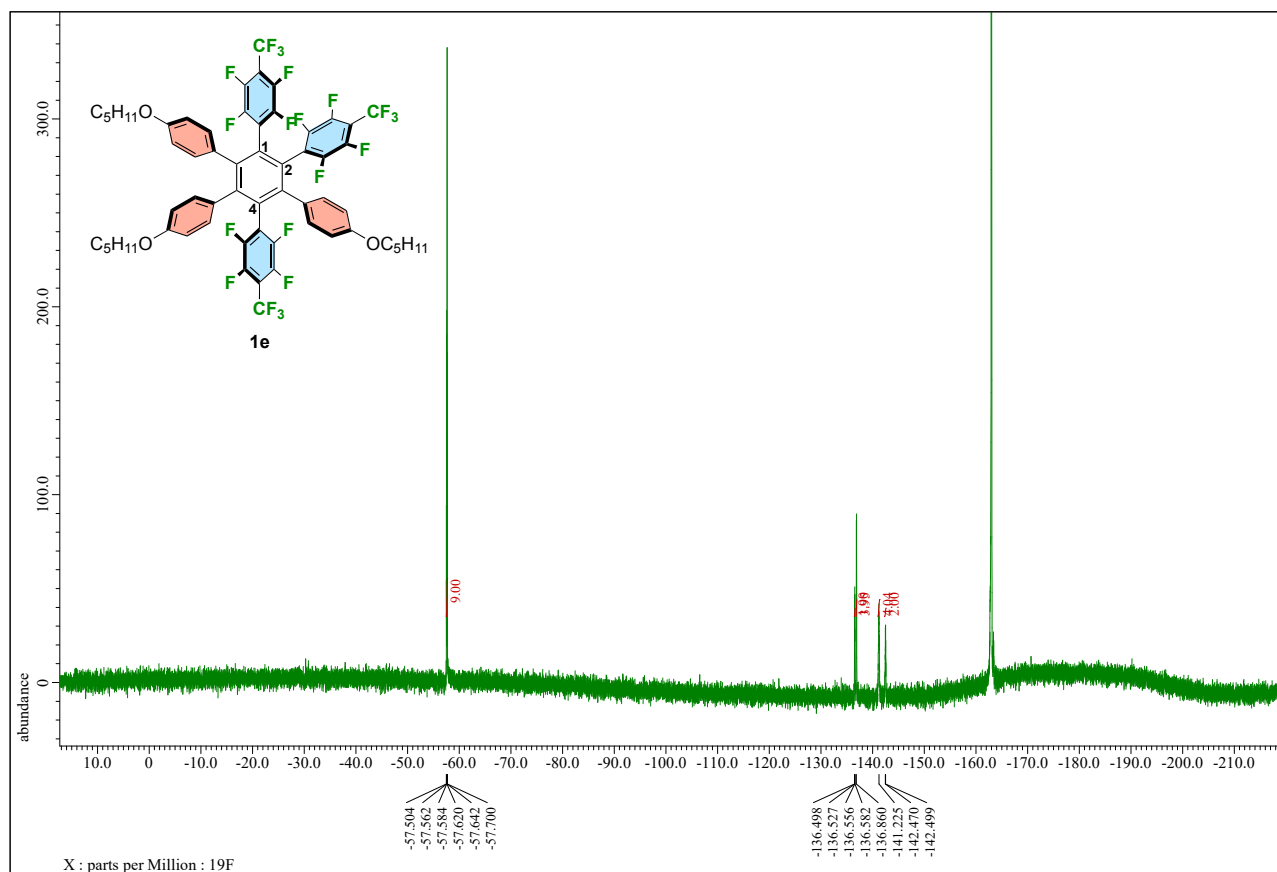

**Figure S21.**  $^{19}\text{F}$  NMR spectrum of **1e** (376 MHz,  $\text{CDCl}_3$ )

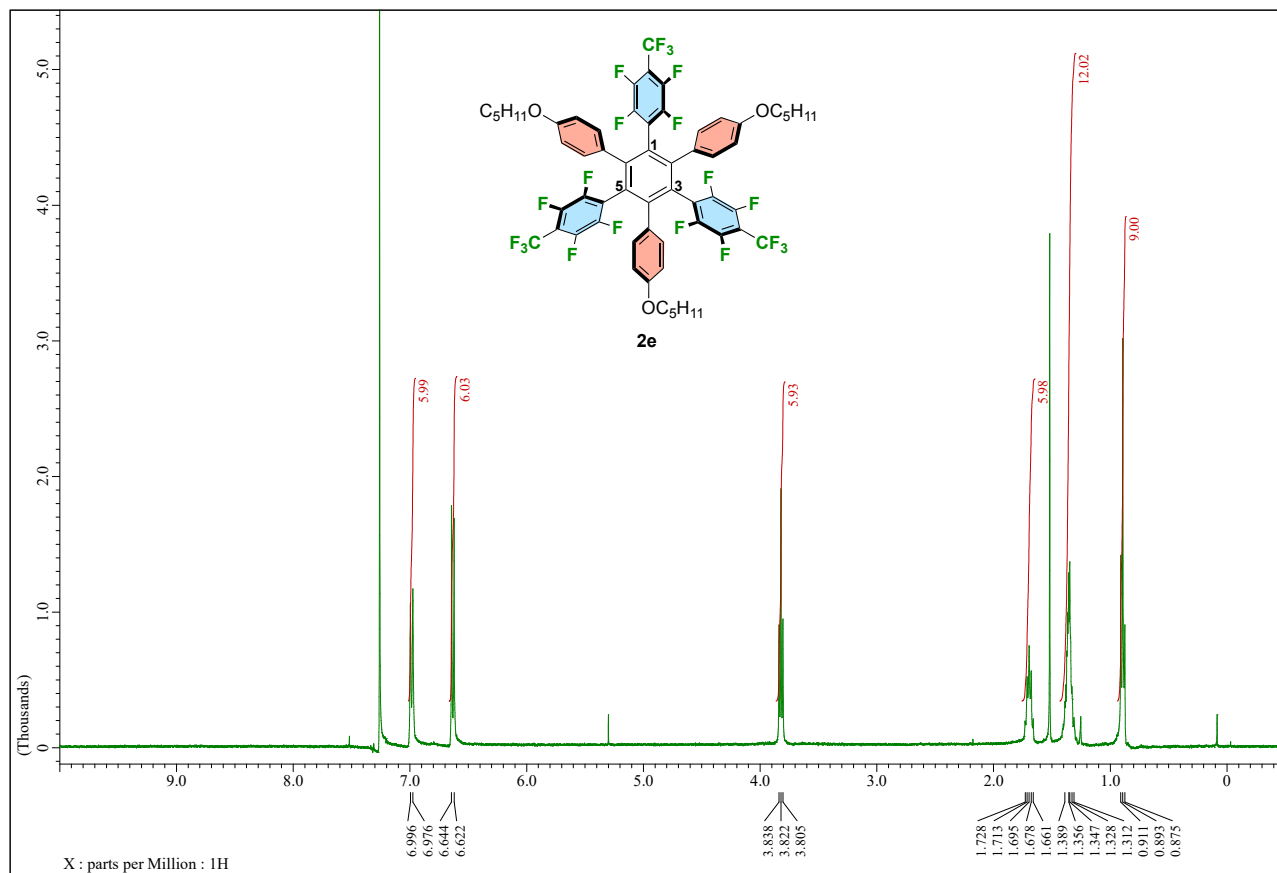

**Figure S22.**  $^1\text{H}$  NMR spectrum of **2e** (400 MHz,  $\text{CDCl}_3$ )



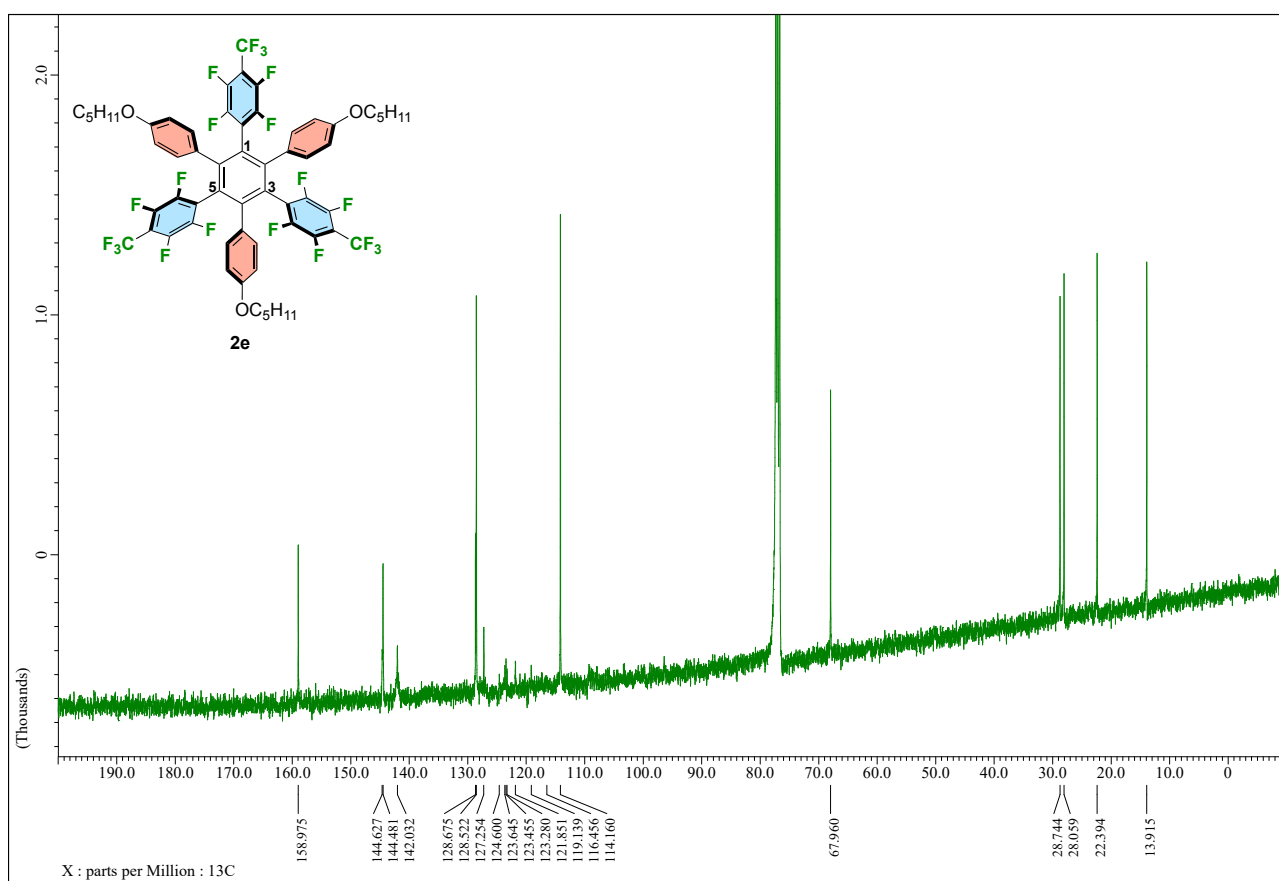

Figure S23.  $^{13}\text{C}$  NMR spectrum of **2e** (100 MHz,  $\text{CDCl}_3$ )

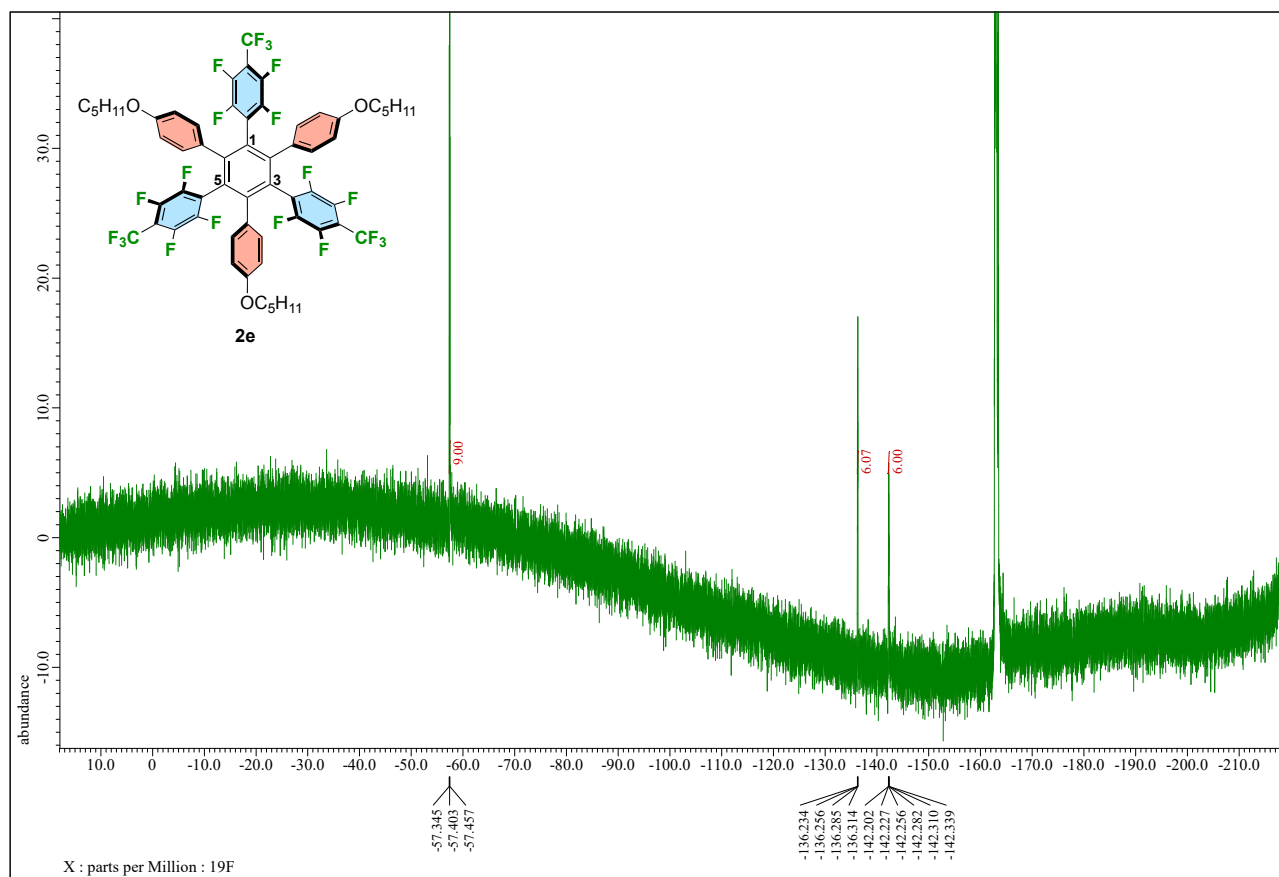

Figure S24.  $^{19}\text{F}$  NMR spectrum of **2e** (376 MHz,  $\text{CDCl}_3$ )

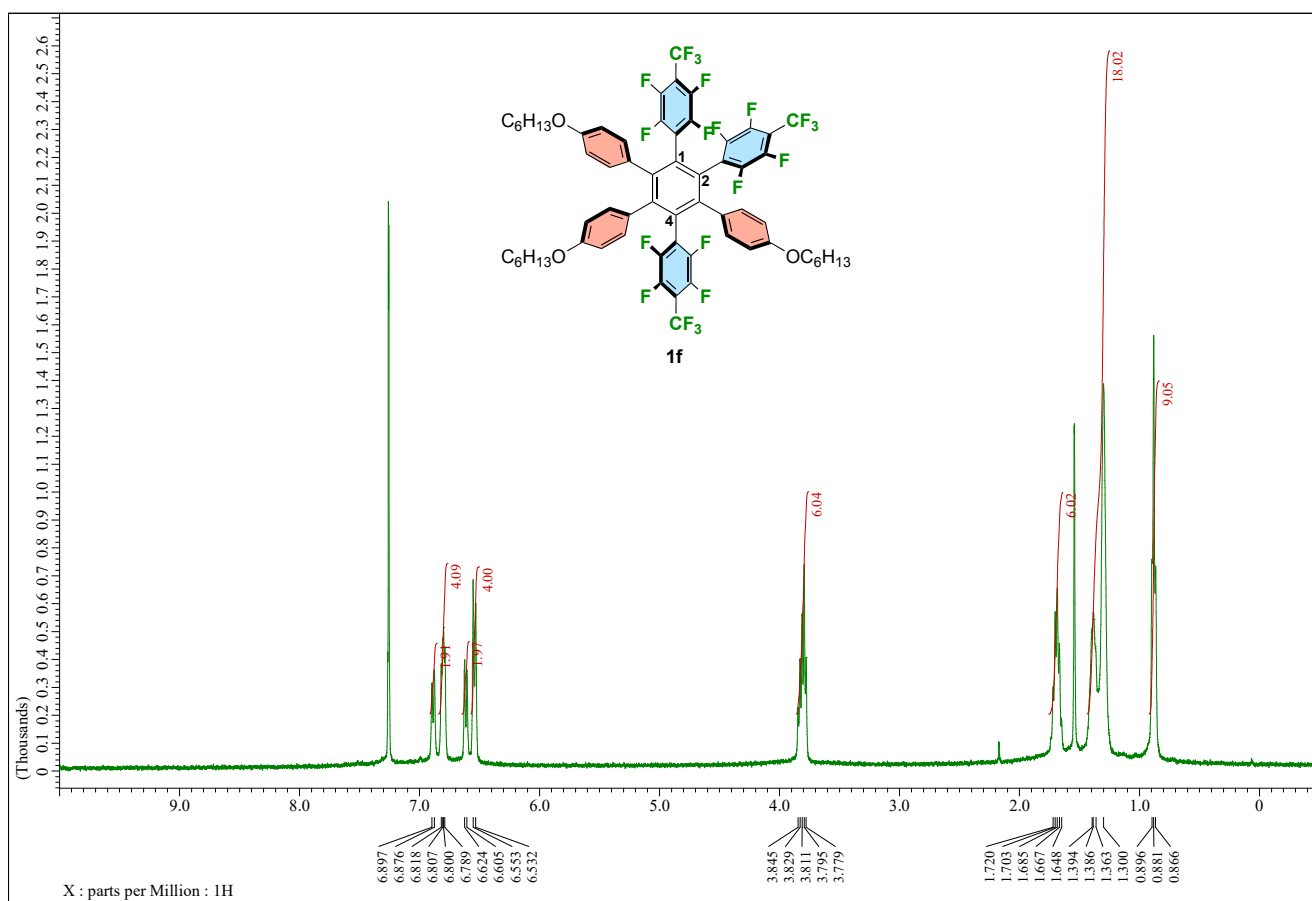

Figure S25. <sup>1</sup>H NMR spectrum of **1f** (400 MHz, CDCl<sub>3</sub>)

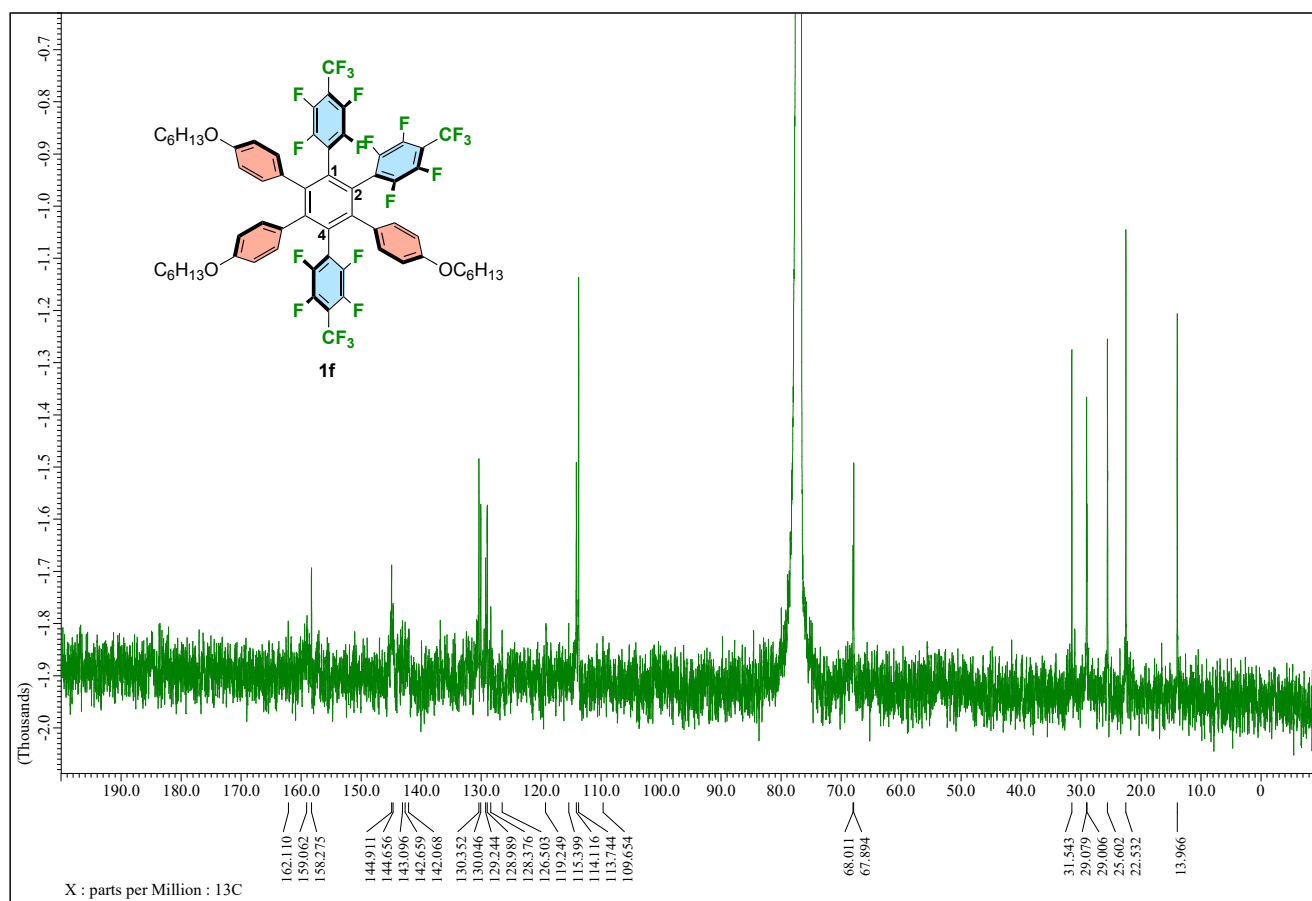

Figure S26. <sup>13</sup>C NMR spectrum of **1f** (100 MHz, CDCl<sub>3</sub>)

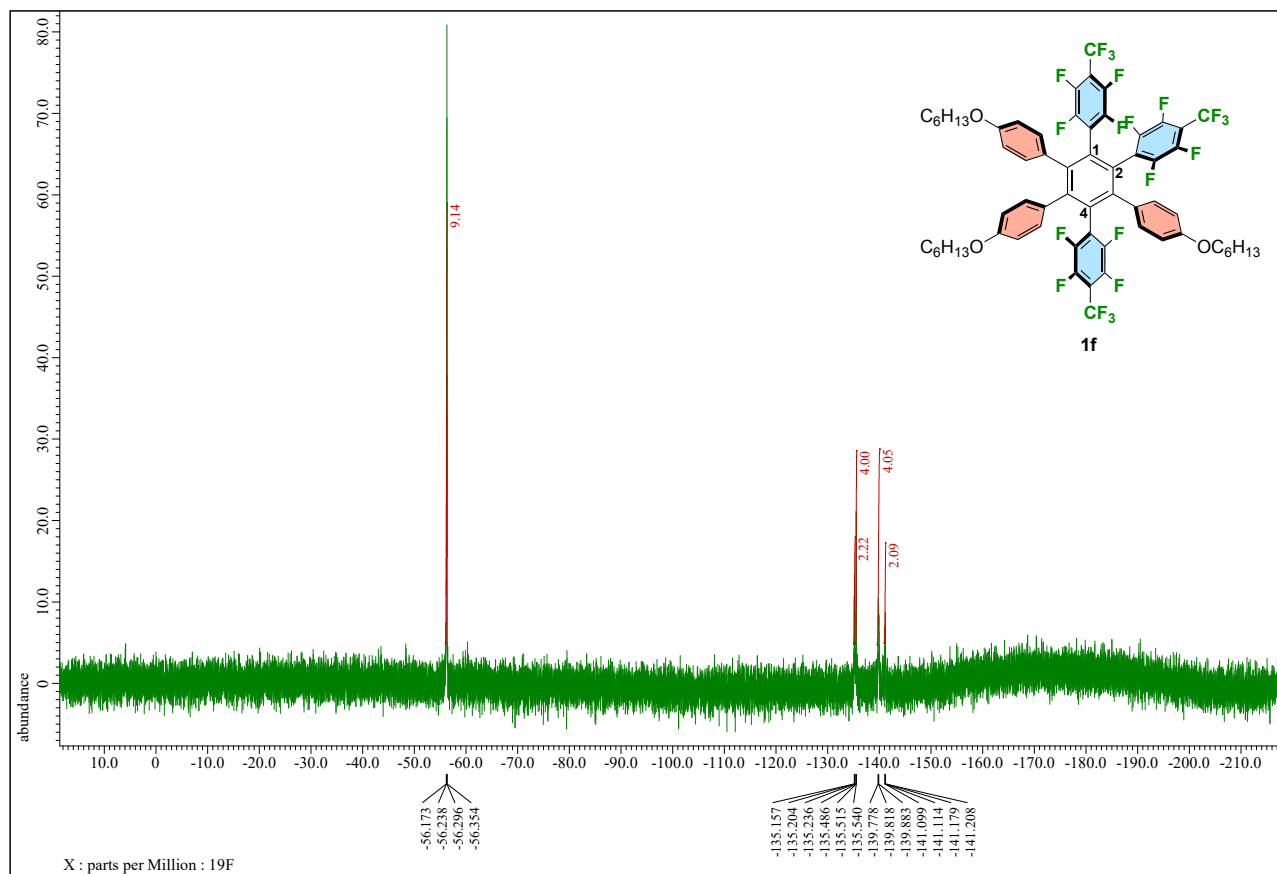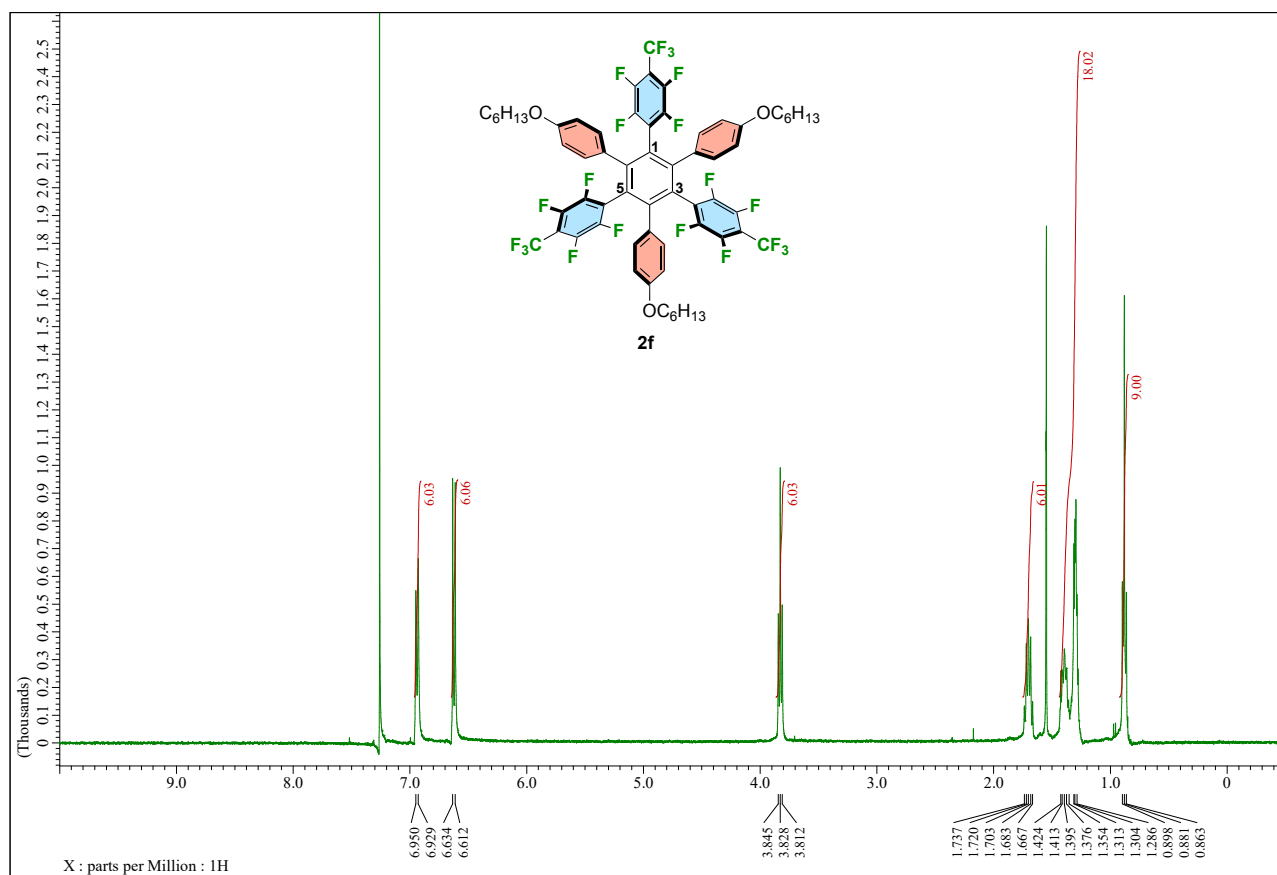

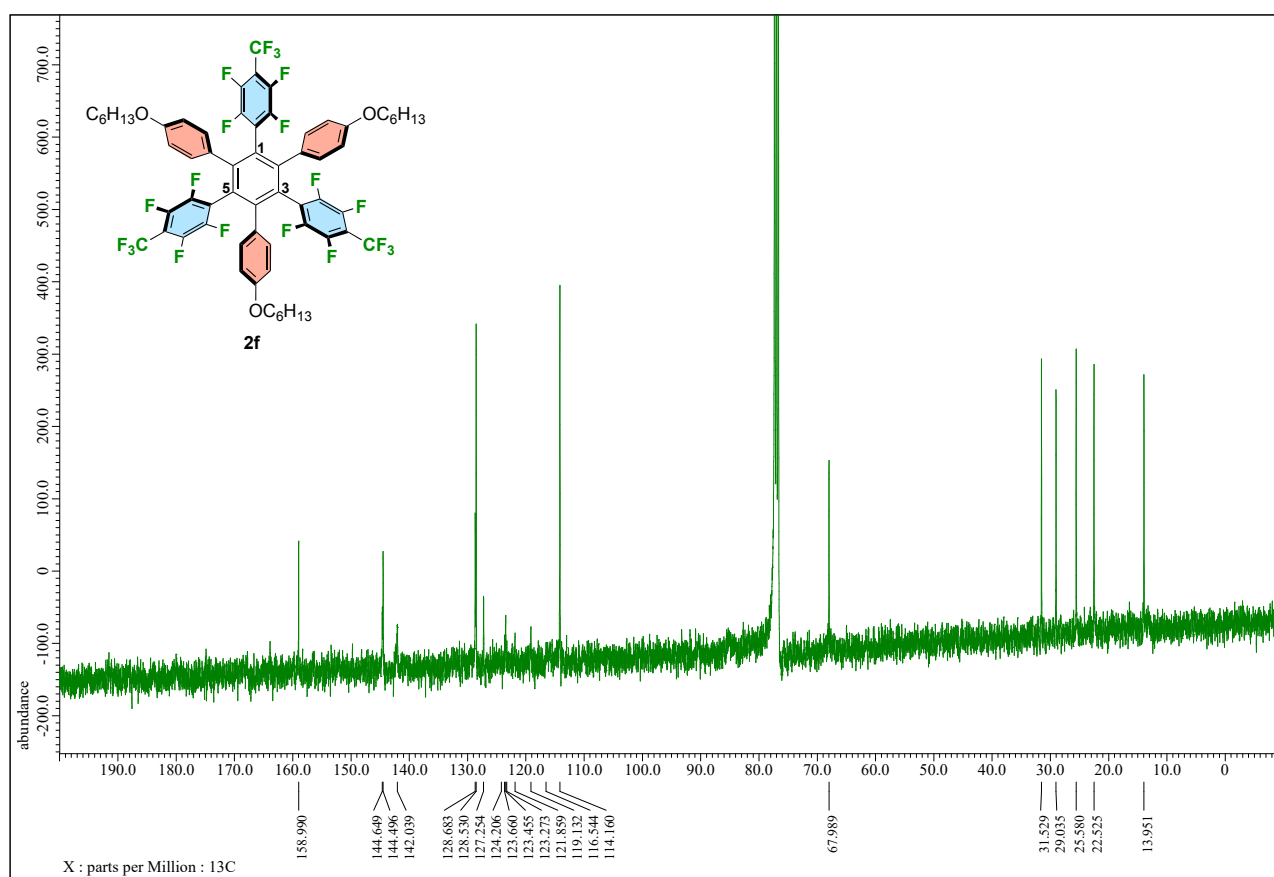

Figure S29.  $^{13}\text{C}$  NMR spectrum of **2f** (100 MHz,  $\text{CDCl}_3$ )

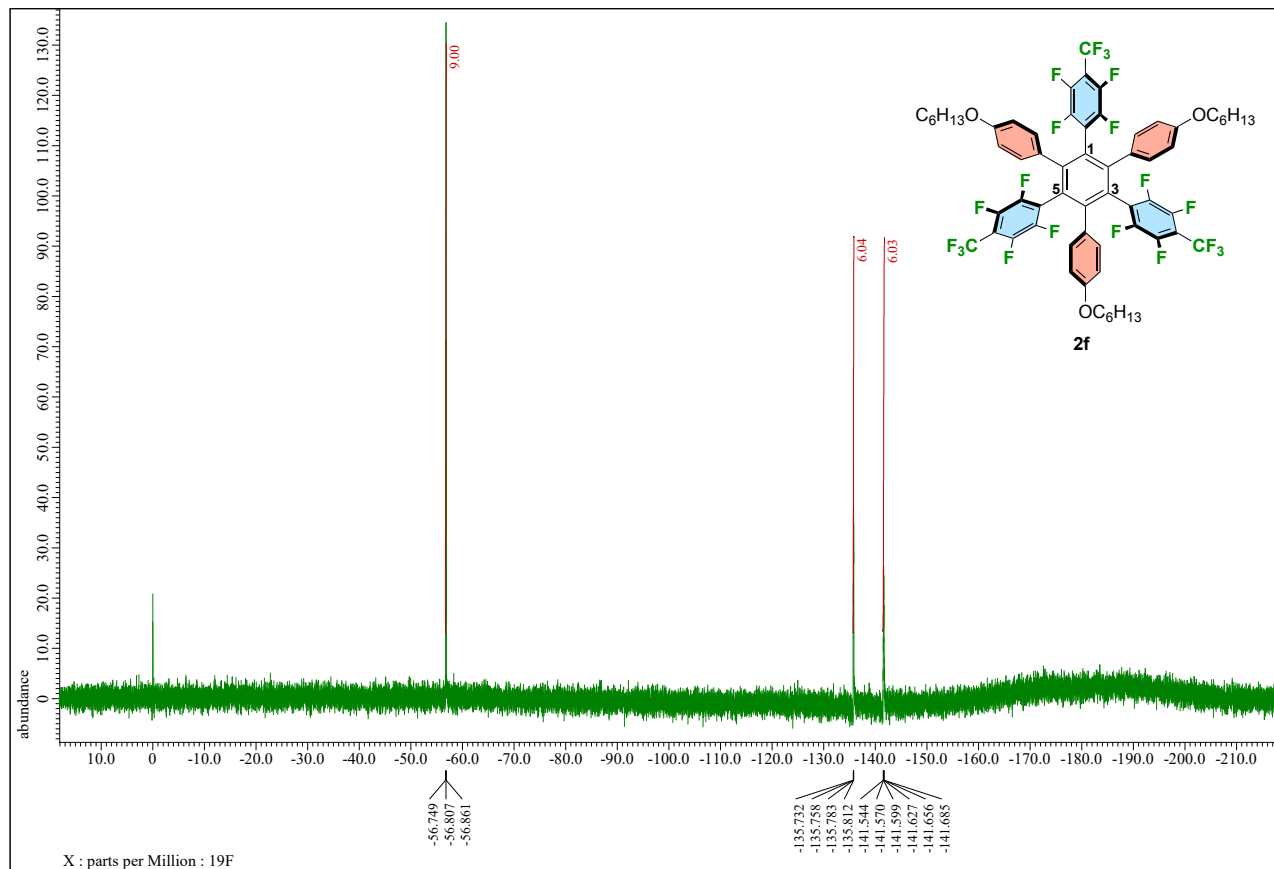

Figure S30.  $^{19}\text{F}$  NMR spectrum of **2f** (376 MHz,  $\text{CDCl}_3$ )

## Phase transition behavior

The phase transition behaviors were observed via polarizing optical microscopy (POM) using a BX53 microscope (Olympus, Tokyo, Japan) equipped with a heating and cooling stage (10.002 L, Linkam Scientific Instruments, Redhill, UK). The phase sequences and transition enthalpies were determined using DSC (Shimadzu DSC-60 Plus) at heating and cooling rates of  $5.0\text{ }^{\circ}\text{C min}^{-1}$  or  $10\text{ }^{\circ}\text{C min}^{-1}$  under an  $\text{N}_2$  atmosphere.

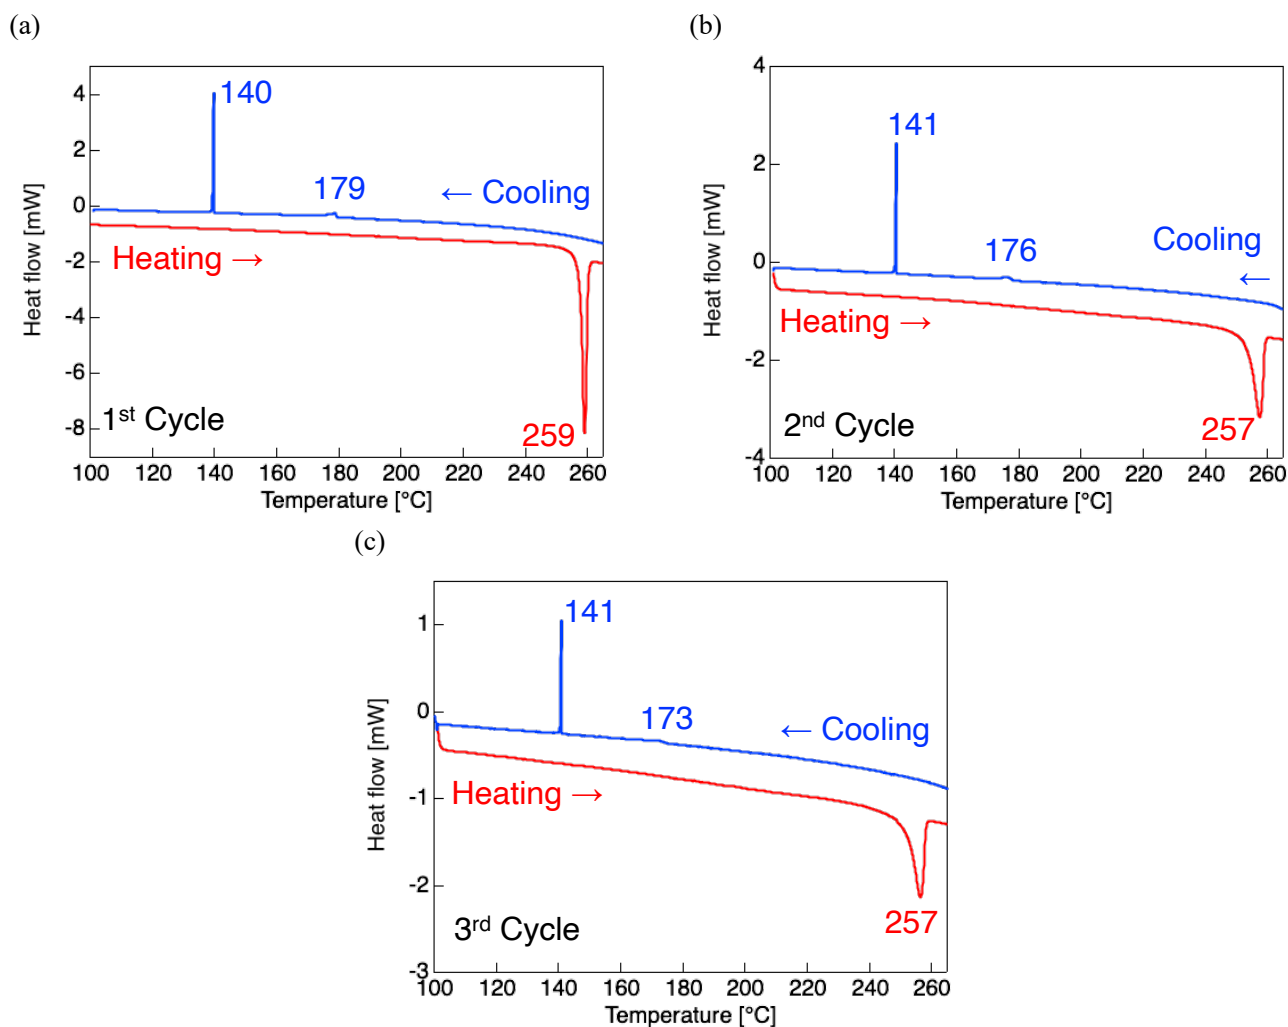

**Figure S31.** DSC thermograms of **1b** on (a) the 1st heating and cooling cycle, (b) the 2nd cycle and (c) 3rd cycle.

**Table S1.** Phase transition data of **1b**.

| Process     | Phase transition | Temperature [ $^{\circ}\text{C}$ ] | $\Delta H$ [ $\text{kJ mol}^{-1}$ ] | $\Delta S$ [ $\text{J mol}^{-1} \text{K}^{-1}$ ] |
|-------------|------------------|------------------------------------|-------------------------------------|--------------------------------------------------|
| 1st Heating | Cr-Iso           | 259                                | 46.42                               | 87.27                                            |
| 1st Cooling | Iso-Col          | 179                                | -4.54                               | -10.06                                           |
|             | Col-Cr           | 140                                | -15.44                              | -37.41                                           |
| 2nd Heating | Cr-Iso           | 257                                | 28.61                               | 53.94                                            |
| 2nd Cooling | Iso-Col          | 176                                | -2.85                               | -6.34                                            |
|             | Col-Cr           | 141                                | -9.92                               | -23.99                                           |
| 3rd Heating | Cr-Iso           | 257                                | 18.58                               | 35.10                                            |
| 3rd Cooling | Iso-Col          | 173                                | -0.47                               | -1.05                                            |
|             | Col-Cr           | 141                                | -5.60                               | -13.52                                           |

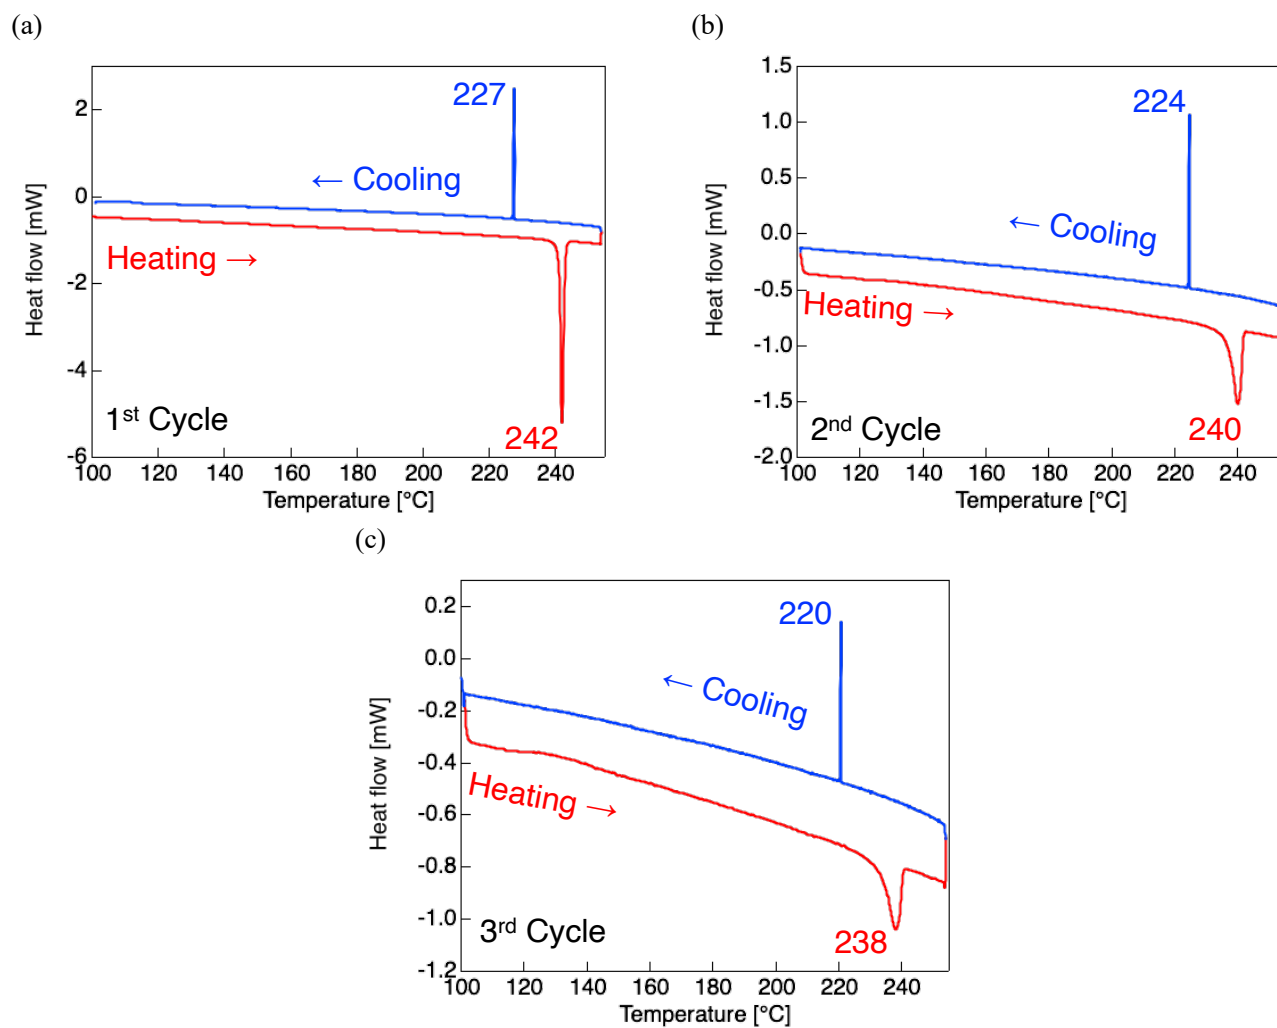

**Figure S32.** DSC thermograms of **2b** on (a) the 1st heating and cooling cycle, (b) the 2nd cycle and (c) 3rd cycle.

**Table S2.** Phase transition data of **2b**.

| Process     | Phase transition | Temperature [°C] | $\Delta H$ [kJ mol <sup>-1</sup> ] | $\Delta S$ [J mol <sup>-1</sup> K <sup>-1</sup> ] |
|-------------|------------------|------------------|------------------------------------|---------------------------------------------------|
| 1st Heating | Cr-Iso           | 242              | 47.37                              | 91.99                                             |
| 1st Cooling | Iso-Cr           | 227              | -17.67                             | -35.31                                            |
| 2nd Heating | Cr-Iso           | 240              | 23.43                              | 45.68                                             |
| 2nd Cooling | Iso-Cr           | 224              | -9.14                              | -18.37                                            |
| 3rd Heating | Cr-Iso           | 238              | 12.42                              | 24.30                                             |
| 3rd Cooling | Iso-Cr           | 220              | -3.90                              | -7.90                                             |

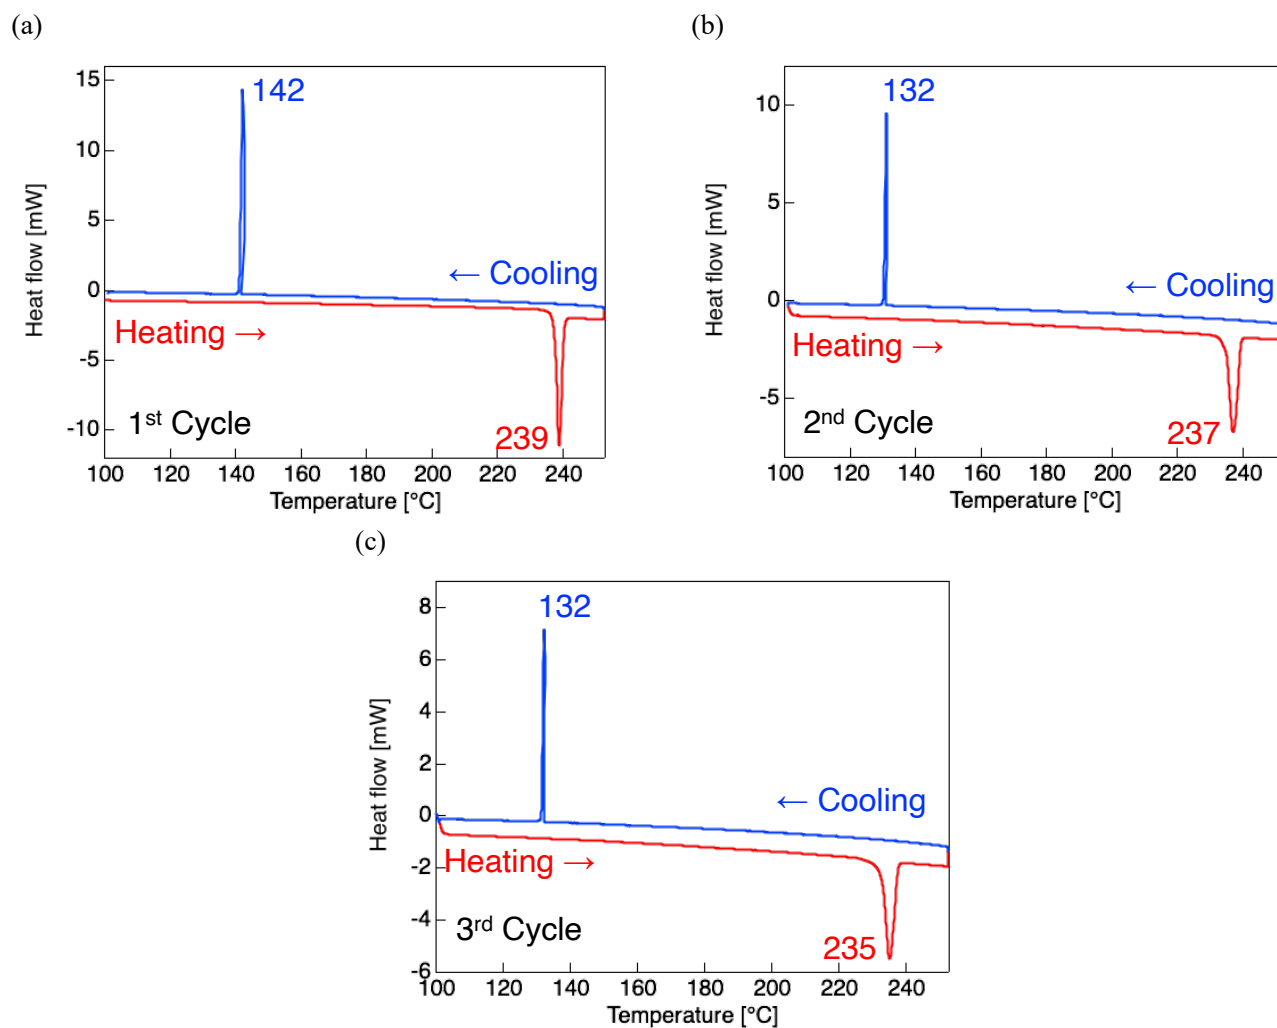

**Figure S33.** DSC thermograms of **1c** on (a) the 1st heating and cooling cycle, (b) the 2nd cycle and (c) 3rd cycle.

**Table S3.** Phase transition data of **1c**.

| Process     | Phase transition | Temperature [°C] | $\Delta H$ [kJ mol <sup>-1</sup> ] | $\Delta S$ [J mol <sup>-1</sup> K <sup>-1</sup> ] |
|-------------|------------------|------------------|------------------------------------|---------------------------------------------------|
| 1st Heating | Cr-Iso           | 239              | 56.78                              | 110.91                                            |
| 1st Cooling | Iso-Cr           | 142              | -38.35                             | -92.35                                            |
| 2nd Heating | Cr-Iso           | 237              | 52.12                              | 102.18                                            |
| 2nd Cooling | Iso-Cr           | 132              | -31.30                             | -77.46                                            |
| 3rd Heating | Cr-Iso           | 235              | 42.84                              | 84.30                                             |
| 3rd Cooling | Iso-Cr           | 132              | -27.44                             | -67.71                                            |

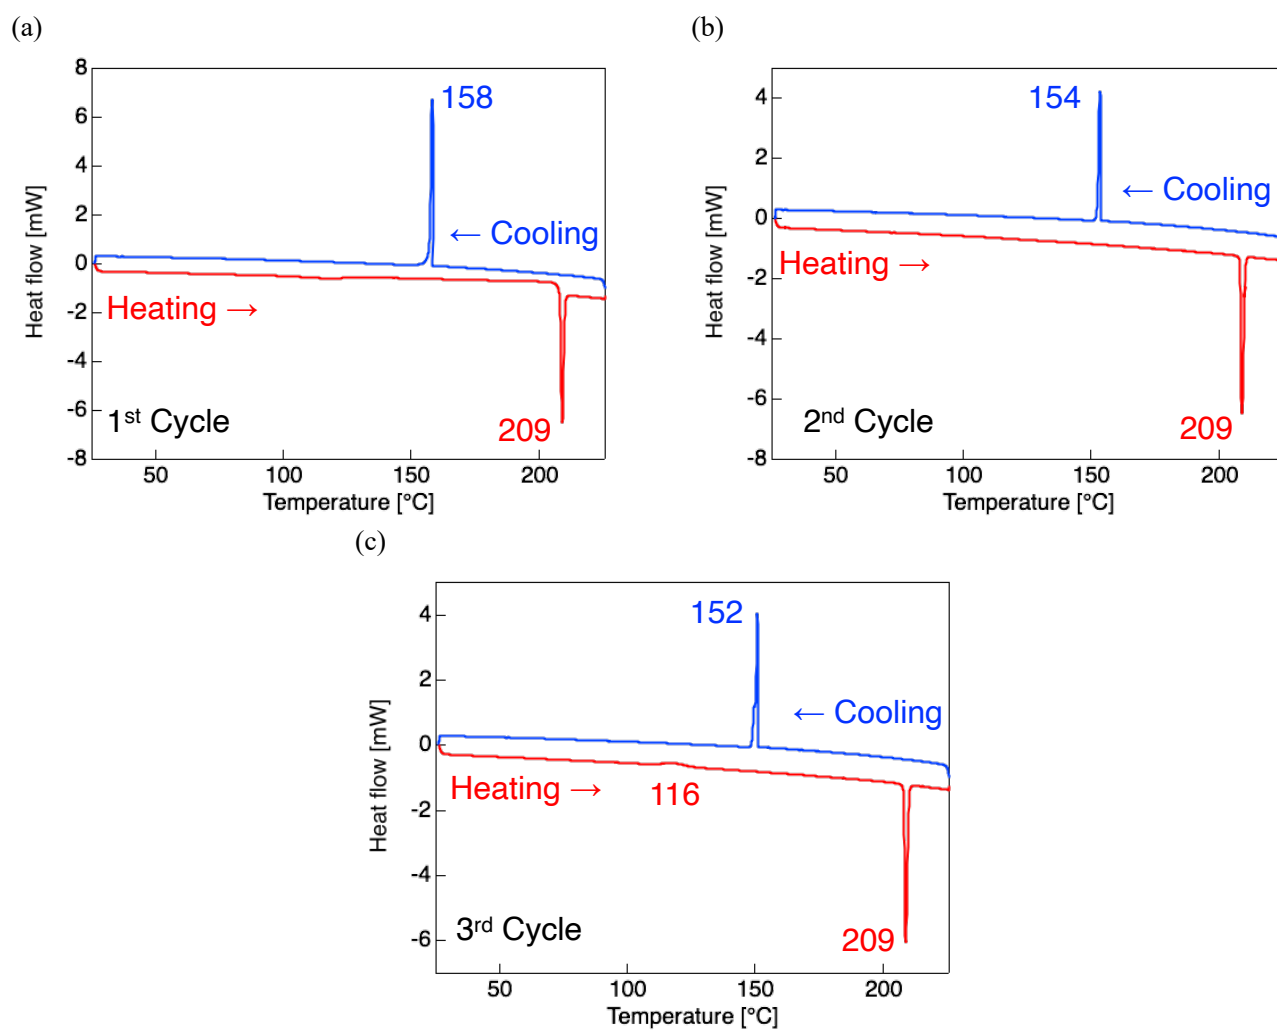

**Figure S34.** DSC thermograms of **2c** on (a) the 1st heating and cooling cycle, (b) the 2nd cycle and (c) 3rd cycle.

**Table S4.** Phase transition data of **2c**.

| Process     | Phase transition | Temperature [°C] | $\Delta H$ [kJ mol <sup>-1</sup> ] | $\Delta S$ [J mol <sup>-1</sup> K <sup>-1</sup> ] |
|-------------|------------------|------------------|------------------------------------|---------------------------------------------------|
| 1st Heating | Cr-Iso           | 209              | 43.46                              | 90.13                                             |
| 1st Cooling | Iso-Cr           | 158              | -37.08                             | -86.00                                            |
| 2nd Heating | Cr-Iso           | 209              | 43.37                              | 89.96                                             |
| 2nd Cooling | Iso-Cr           | 154              | -29.26                             | -68.53                                            |
| 3rd Heating | Cr-Cr            | 116              | -5.44                              | -13.98                                            |
|             | Cr-Iso           | 209              | 39.27                              | 81.47                                             |
| 3rd Cooling | Iso-Cr           | 152              | -26.67                             | -62.74                                            |



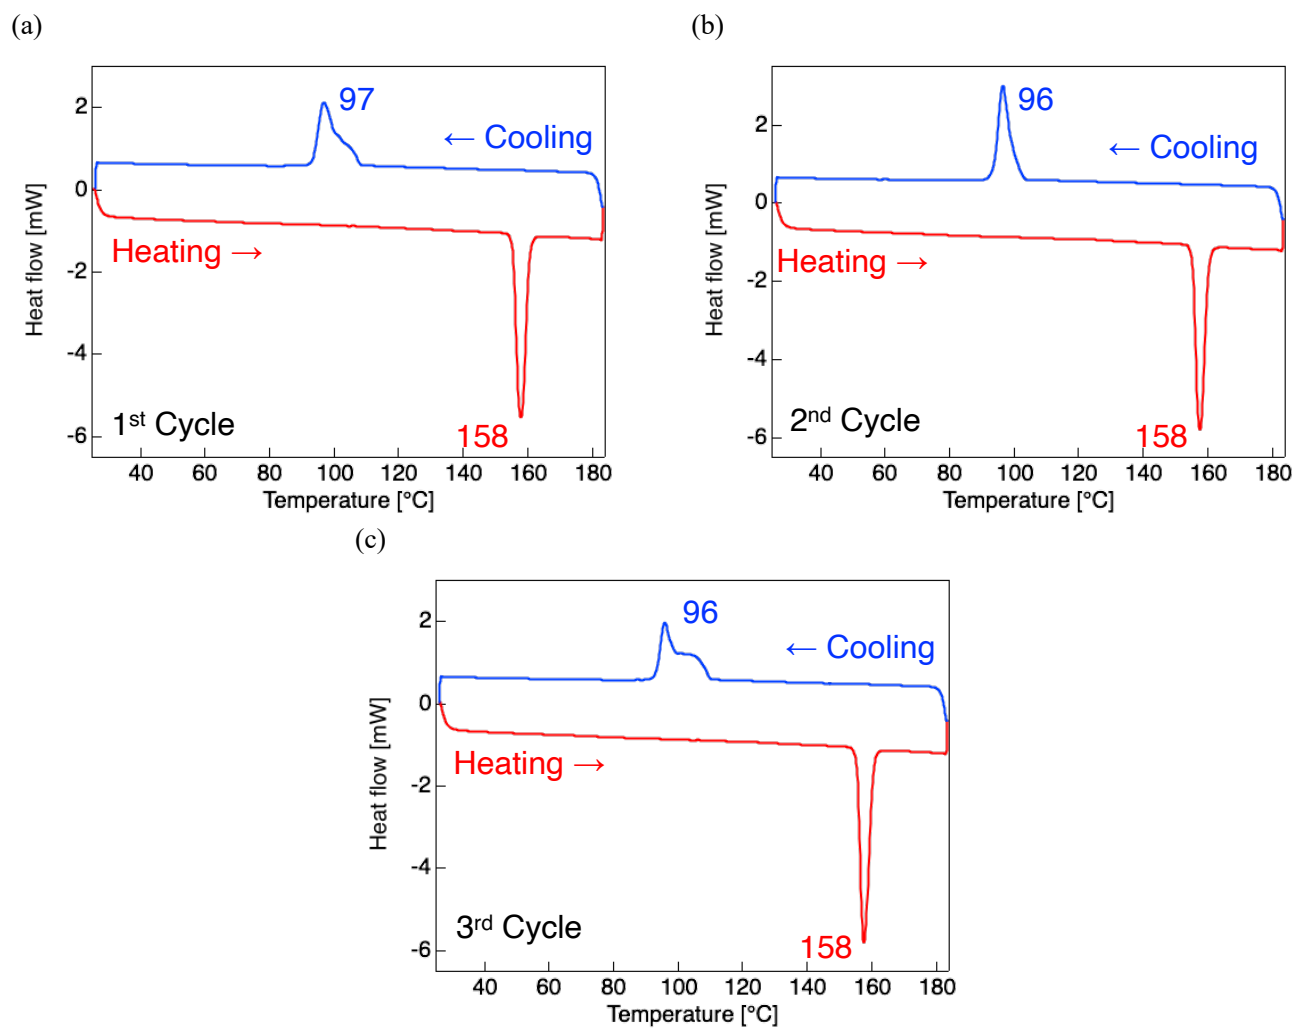

**Figure S35.** DSC thermograms of **1d** on (a) the 1st heating and cooling cycle, (b) the 2nd cycle and (c) 3rd cycle.

**Table S5.** Phase transition data of **1d**.

| Process     | Phase transition | Temperature [°C] | $\Delta H$ [kJ mol <sup>-1</sup> ] | $\Delta S$ [J mol <sup>-1</sup> K <sup>-1</sup> ] |
|-------------|------------------|------------------|------------------------------------|---------------------------------------------------|
| 1st Heating | Cr-Iso           | 158              | 45.10                              | 104.69                                            |
| 1st Cooling | Iso-Cr           | 97               | -33.45                             | -90.46                                            |
| 2nd Heating | Cr-Iso           | 158              | 45.36                              | 105.35                                            |
| 2nd Cooling | Iso-Cr           | 96               | -32.71                             | -88.56                                            |
| 3rd Heating | Cr-Iso           | 158              | 45.18                              | 104.95                                            |
| 3rd Cooling | Iso-Cr           | 96               | -33.56                             | -90.97                                            |

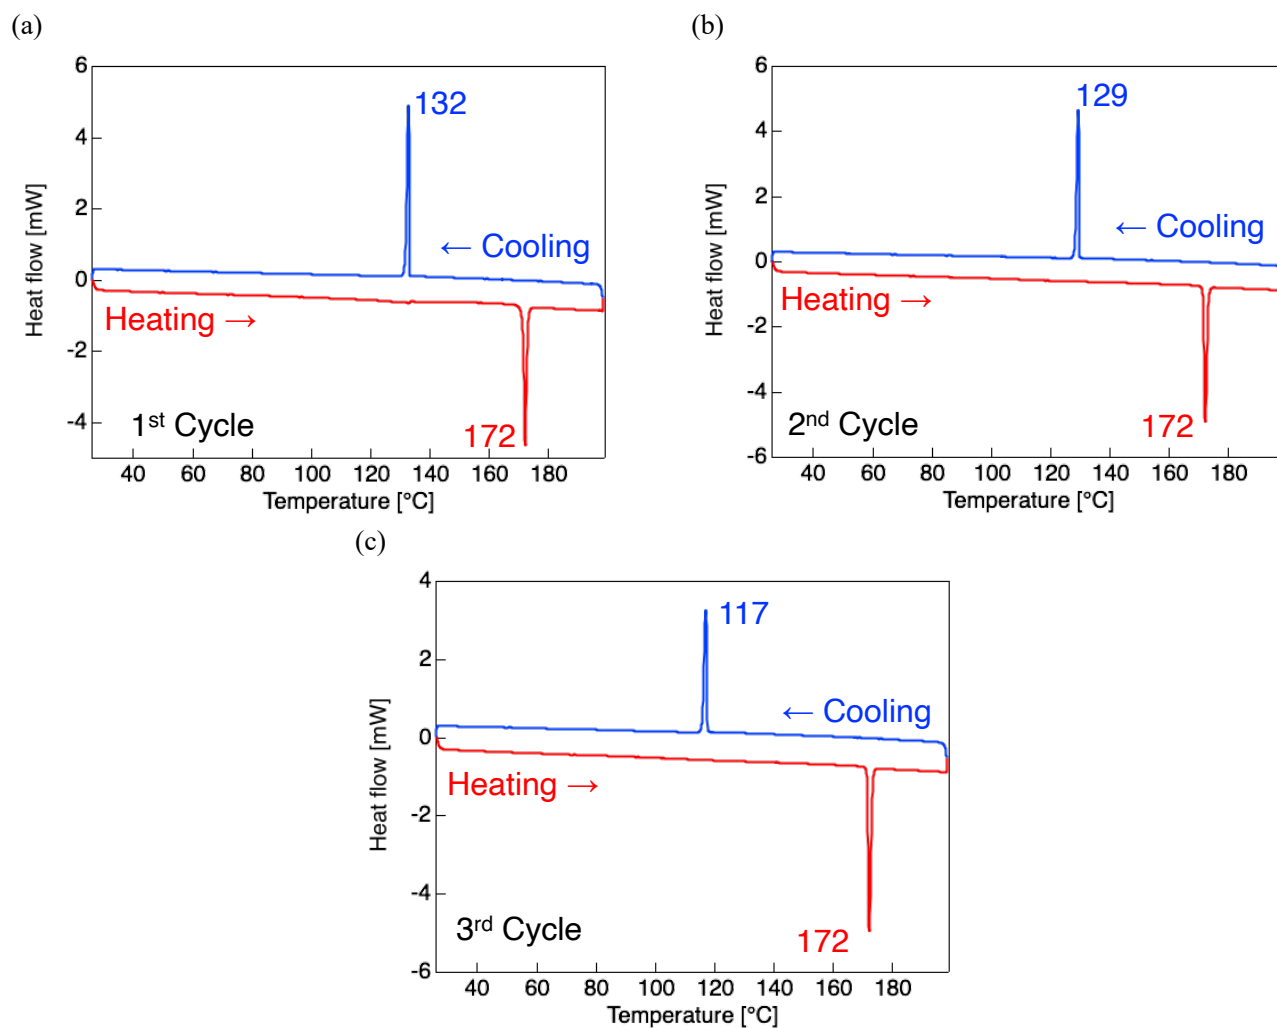

**Figure S36.** DSC thermograms of **2d** on (a) the 1st heating and cooling cycle, (b) the 2nd cycle and (c) 3rd cycle.

**Table S6.** Phase transition data of **2d**.

| Process     | Phase transition | Temperature [°C] | $\Delta H$ [kJ mol <sup>-1</sup> ] | $\Delta S$ [J mol <sup>-1</sup> K <sup>-1</sup> ] |
|-------------|------------------|------------------|------------------------------------|---------------------------------------------------|
| 1st Heating | Cr-Iso           | 172              | 25.27                              | 56.78                                             |
| 1st Cooling | Iso-Cr           | 132              | -20.77                             | -51.21                                            |
| 2nd Heating | Cr-Iso           | 172              | 25.70                              | 57.75                                             |
| 2nd Cooling | Iso-Cr           | 129              | -20.24                             | -50.34                                            |
| 3rd Heating | Cr-Iso           | 172              | 25.62                              | 57.57                                             |
| 3rd Cooling | Iso-Cr           | 117              | -18.27                             | -46.85                                            |

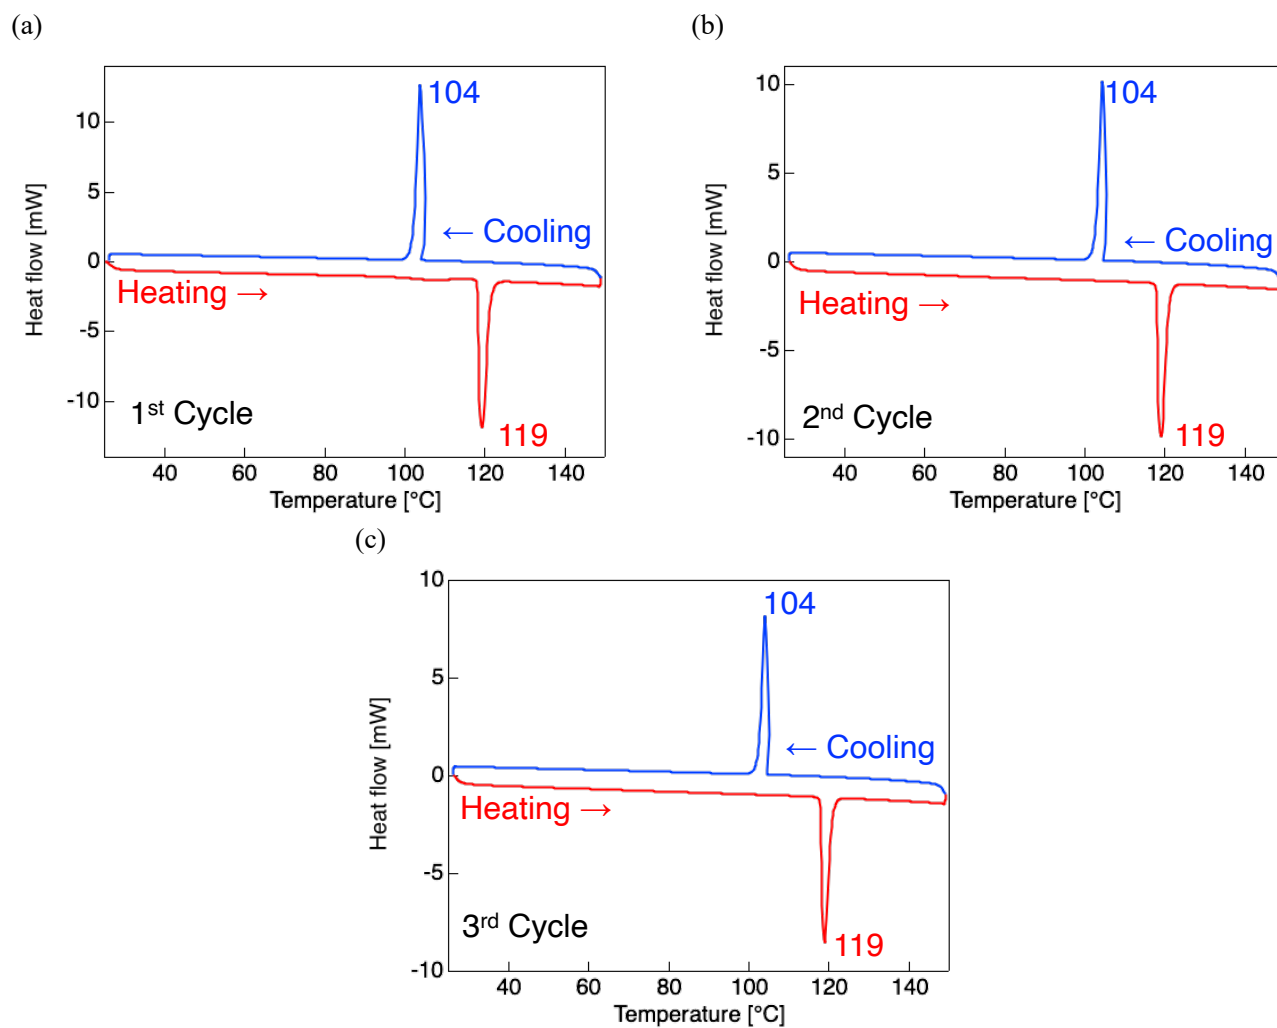

**Figure S37.** DSC thermograms of **1e** on (a) the 1st heating and cooling cycle, (b) the 2nd cycle and (c) 3rd cycle.

**Table S7.** Phase transition data of **1e**.

| Process     | Phase transition | Temperature [°C] | $\Delta H$ [kJ mol <sup>-1</sup> ] | $\Delta S$ [J mol <sup>-1</sup> K <sup>-1</sup> ] |
|-------------|------------------|------------------|------------------------------------|---------------------------------------------------|
| 1st Heating | Cr-Iso           | 119              | 70.01                              | 178.47                                            |
| 1st Cooling | Iso-Cr           | 104              | -54.90                             | -145.76                                           |
| 2nd Heating | Cr-Iso           | 119              | 55.99                              | 142.86                                            |
| 2nd Cooling | Iso-Cr           | 104              | -44.22                             | -117.26                                           |
| 3rd Heating | Cr-Iso           | 119              | 44.73                              | 114.14                                            |
| 3rd Cooling | Iso-Cr           | 104              | -34.73                             | -92.13                                            |

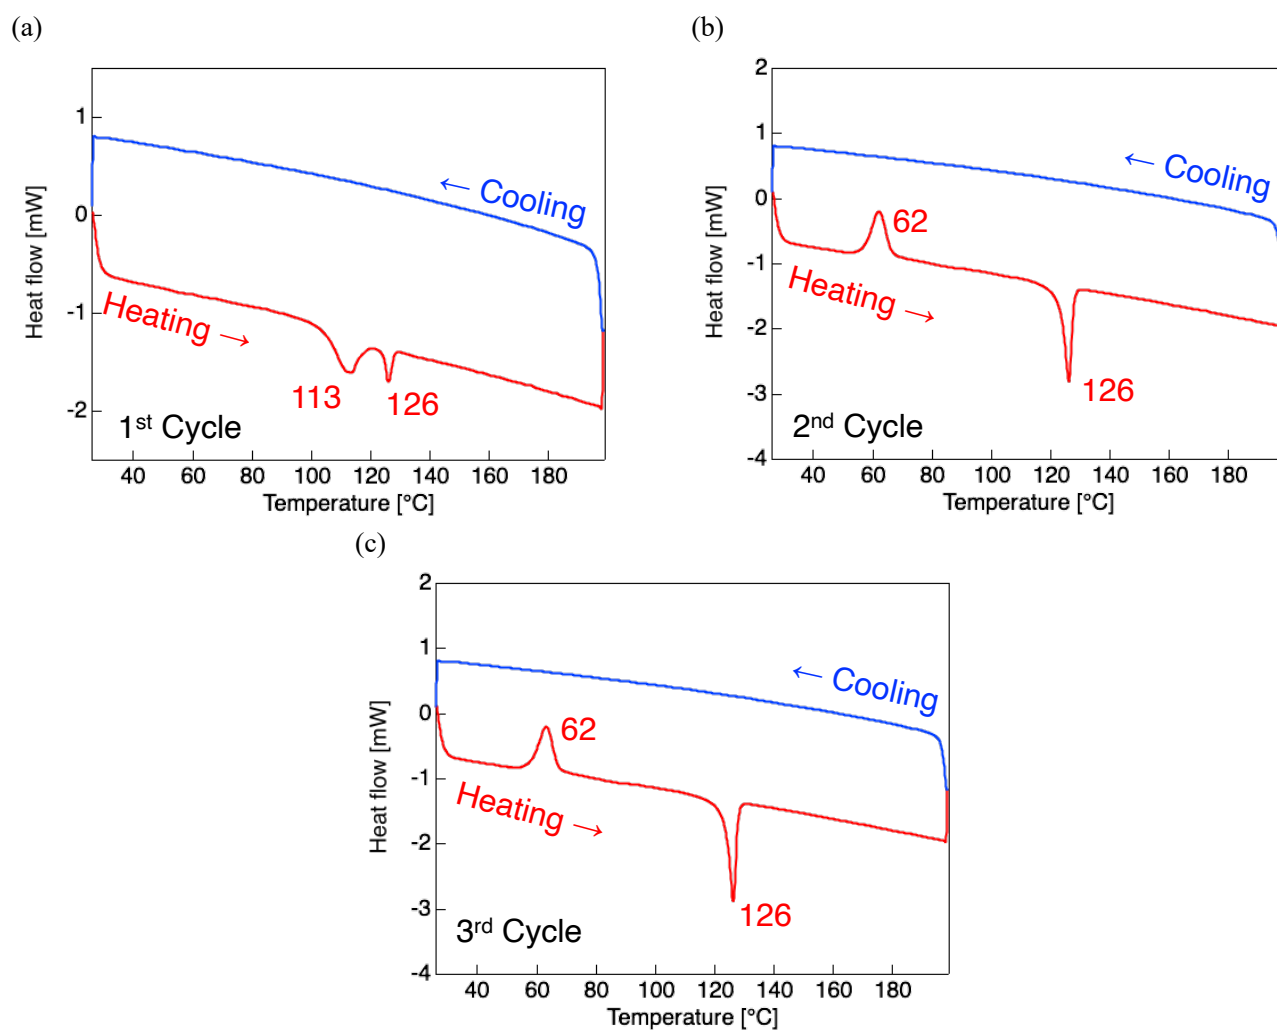

**Figure S38.** DSC thermograms of **2e** on (a) the 1st heating and cooling cycle, (b) the 2nd cycle and (c) 3rd cycle.

**Table S8.** Phase transition data of **2e**.

| Process     | Phase transition | Temperature [°C] | $\Delta H$ [kJ mol <sup>-1</sup> ] | $\Delta S$ [J mol <sup>-1</sup> K <sup>-1</sup> ] |
|-------------|------------------|------------------|------------------------------------|---------------------------------------------------|
| 1st Heating | Cr-Cr            | 113              | 11.38                              | 29.44                                             |
|             | Cr-Iso           | 126              | 3.02                               | 7.57                                              |
| 1st Cooling | Iso-G            |                  |                                    |                                                   |
| 2nd Heating | G-Cr             | 62               | -14.99                             | -44.75                                            |
|             | Cr-Iso           | 126              | 20.30                              | 50.88                                             |
| 2nd Cooling | Iso-G            |                  |                                    |                                                   |
| 3rd Heating | G-Cr             | 63               | -14.87                             | -44.24                                            |
|             | Cr-Iso           | 126              | 20.63                              | 51.68                                             |
| 3rd Cooling | Iso-G            |                  |                                    |                                                   |

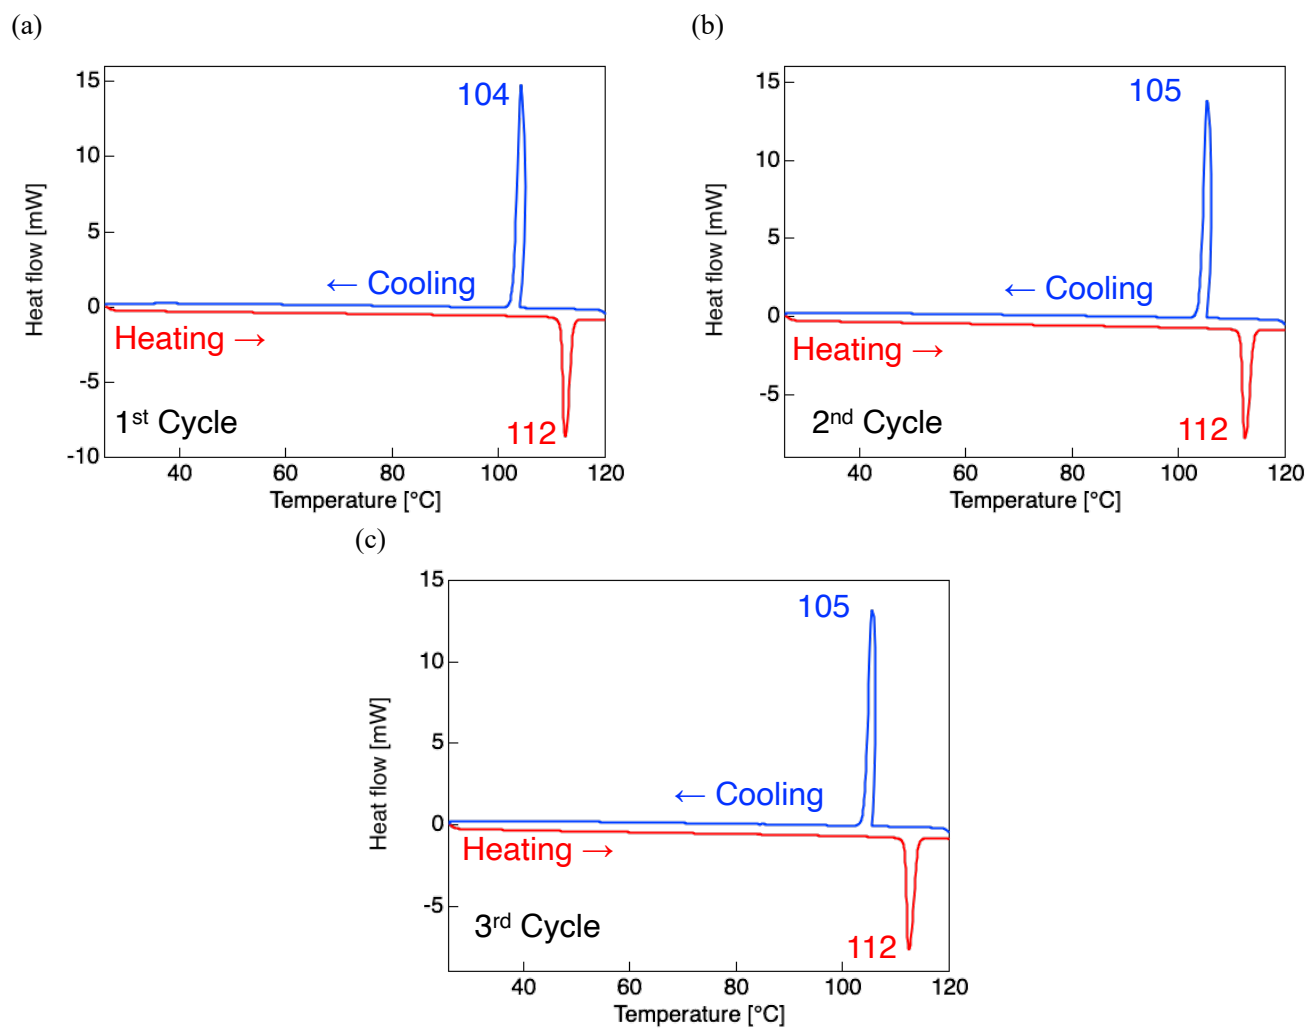

**Figure S39.** DSC thermograms of **1f** on (a) the 1<sup>st</sup> heating and cooling cycle, (b) the 2<sup>nd</sup> cycle and (c) 3<sup>rd</sup> cycle.

**Table S9.** Phase transition data of **1f**.

| Process                 | Phase transition | Temperature [°C] | $\Delta H$ [kJ mol <sup>-1</sup> ] | $\Delta S$ [J mol <sup>-1</sup> K <sup>-1</sup> ] |
|-------------------------|------------------|------------------|------------------------------------|---------------------------------------------------|
| 1 <sup>st</sup> Heating | Cr-Iso           | 112              | 62.59                              | 162.38                                            |
| 1 <sup>st</sup> Cooling | Iso-Cr           | 104              | -60.77                             | -161.12                                           |
| 2 <sup>nd</sup> Heating | Cr-Iso           | 112              | 60.67                              | 157.74                                            |
| 2 <sup>nd</sup> Cooling | Iso-Cr           | 105              | -59.59                             | -157.52                                           |
| 3 <sup>rd</sup> Heating | Cr-Iso           | 112              | 59.60                              | 154.94                                            |
| 3 <sup>rd</sup> Cooling | Iso-Cr           | 105              | -58.23                             | -153.84                                           |

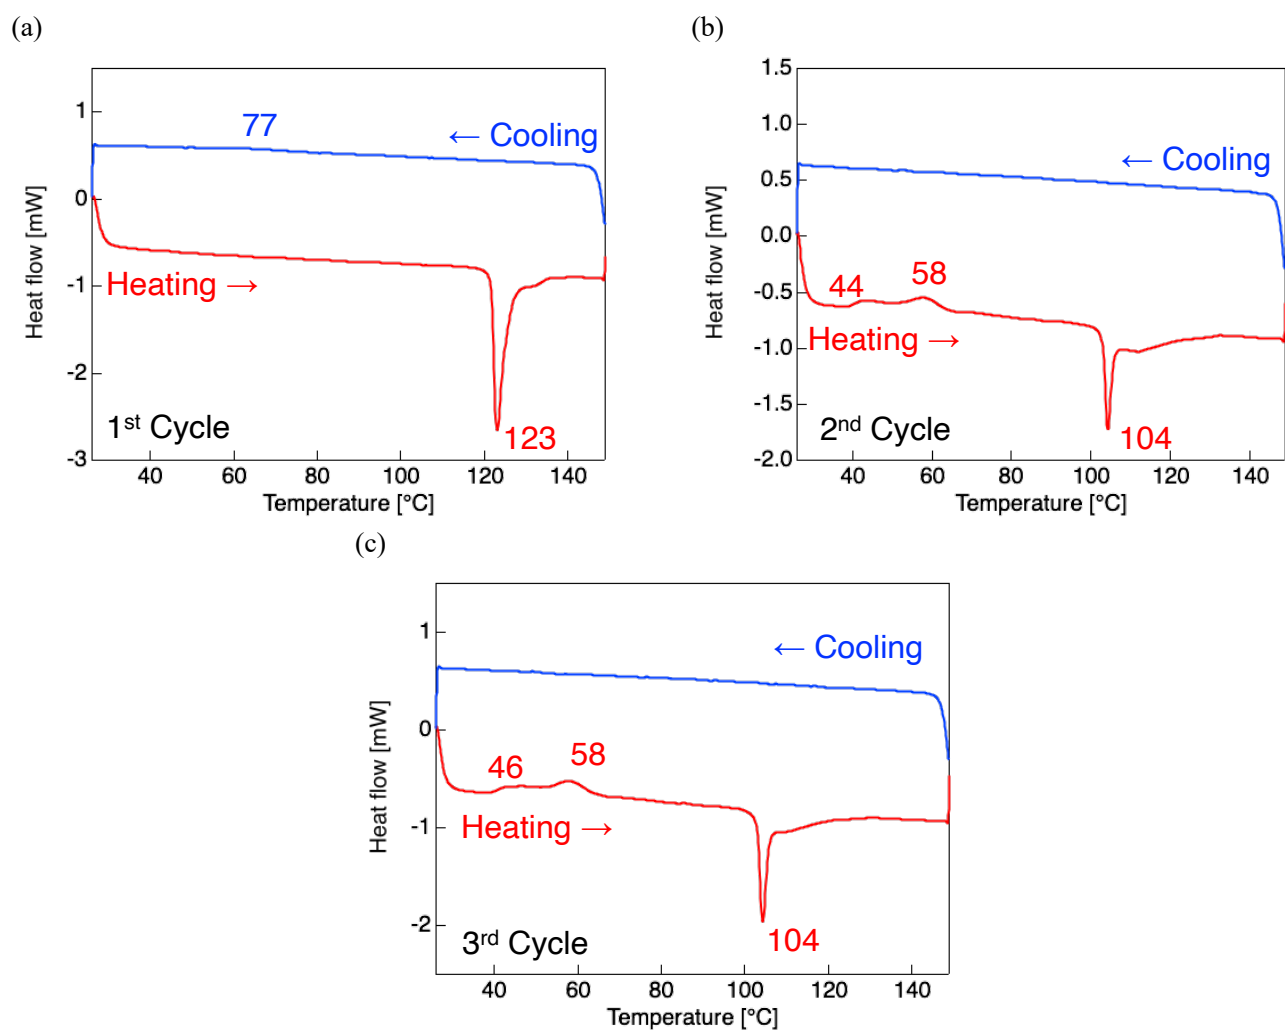

**Figure S40.** DSC thermograms of **2f** on (a) the 1st heating and cooling cycle, (b) the 2nd cycle and (c) 3rd cycle.

**Table S10.** Phase transition data of **2f**.

| Process     | Phase transition | Temperature [°C] | $\Delta H$ [kJ mol <sup>-1</sup> ] | $\Delta S$ [J mol <sup>-1</sup> K <sup>-1</sup> ] |
|-------------|------------------|------------------|------------------------------------|---------------------------------------------------|
| 1st Heating | Cr-Iso           | 123              | 34.50                              | 87.09                                             |
| 1st Cooling | Iso-G            | 77               |                                    |                                                   |
| 2nd Heating | G-Cr             | 44               | -1.22                              | -3.84                                             |
|             | Cr-Cr            | 58               | -8.12                              | -24.54                                            |
|             | Cr-Iso           | 104              | 24.61                              | 65.24                                             |
| 2nd Cooling | Iso-G            |                  |                                    |                                                   |
| 3rd Heating | G-Cr             | 46               | -1.44                              | -4.52                                             |
|             | Cr-Cr            | 58               | -3.25                              | -9.82                                             |
|             | Cr-Iso           | 104              | 24.90                              | 65.98                                             |
| 3rd Cooling | Iso-G            |                  |                                    |                                                   |

## Photophysical behavior

Ultraviolet-visible light (UV-vis) absorption spectroscopy was conducted using a V-750 absorption spectrometer (JASCO, Tokyo, Japan), and PL spectroscopy of the solution and crystalline samples was performed using an RF-6000 spectrofluorophotometer (Shimadzu, Kyoto, Japan). The absolute quantum yields of the solution and crystalline samples were measured using a Quantaaurus-QY absolute PL quantum yield spectrometer (C11347-01, Hamamatsu Photonics, Hamamatsu, Japan).

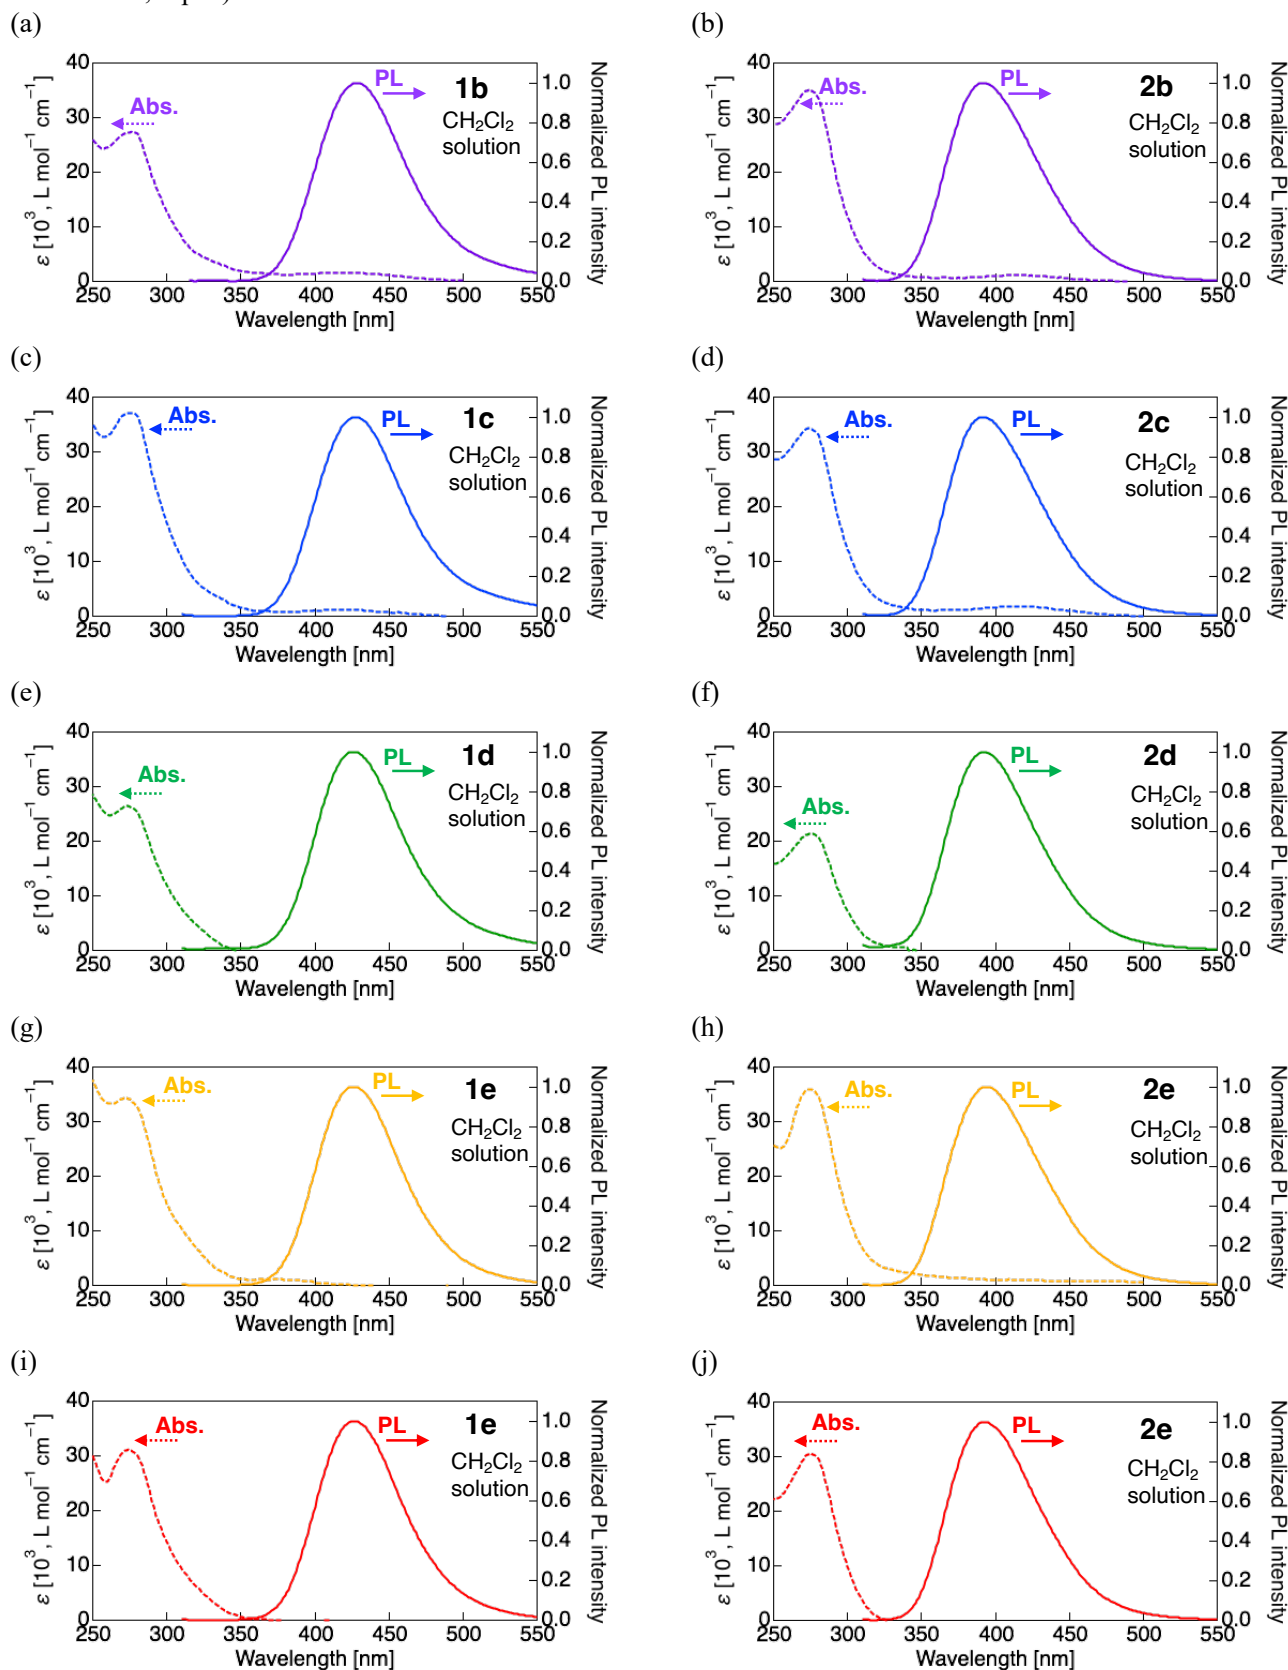

**Figure S41.** Absorption and PL spectra of (a) **1b**, (b) **2b**, (c) **1c**, (d) **2c**, (e) **1d**, (f) **2d**, (g) **1e**, (h) **2e**, (i) **1f**, (j) **2f** in  $\text{CH}_2\text{Cl}_2$  solution (Concentration:  $1.0 \times 10^{-5} \text{ mol L}^{-1}$ ).

## PL lifetime measurement

PL lifetimes were measured using a QuantaTaurus-Tau fluorescence lifetime spectrometer (C11367-34, Hamamatsu Photonics, Japan).

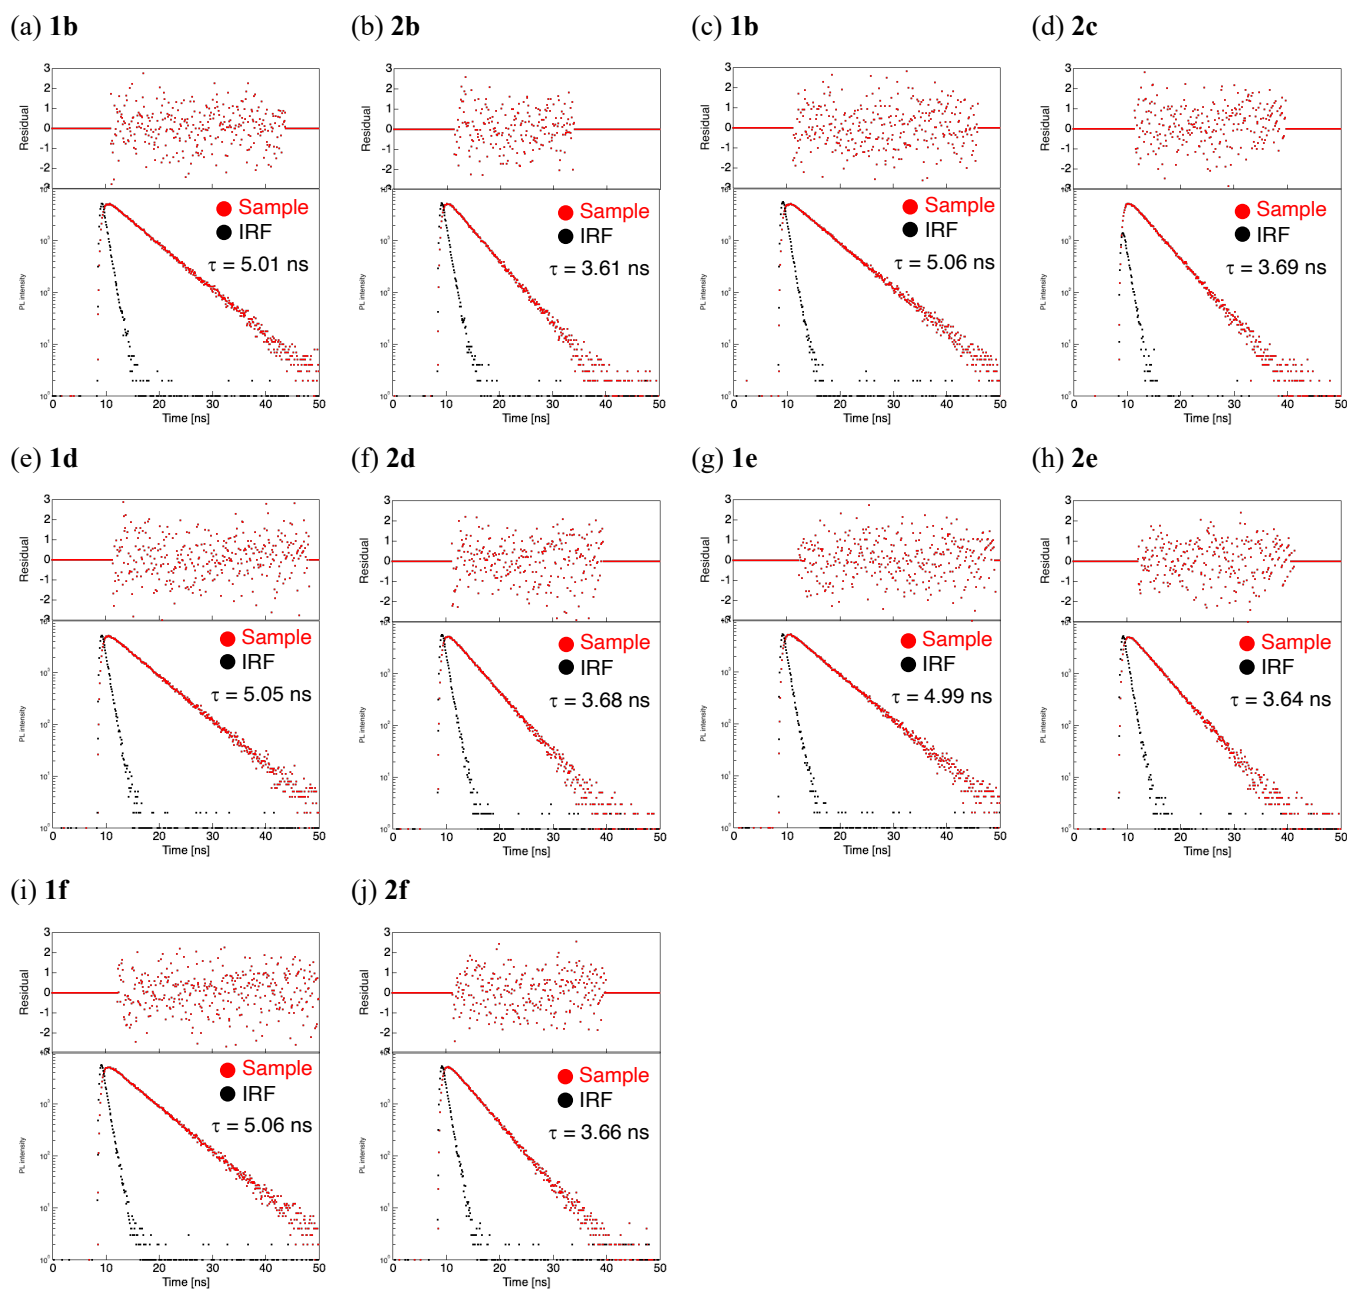

**Figure S42.** PL decay profile and residual from a single exponential fit for (a) 1b, (b) 2b, (c) 1c, (d) 2c, (e) 1d, (f) 2d, (g) 1e, (h) 2e, (i) 1f, (j) 2f in  $\text{CH}_2\text{Cl}_2$  solution (Concentration:  $1.0 \times 10^{-5} \text{ mol L}^{-1}$ ).



## Crystalline state

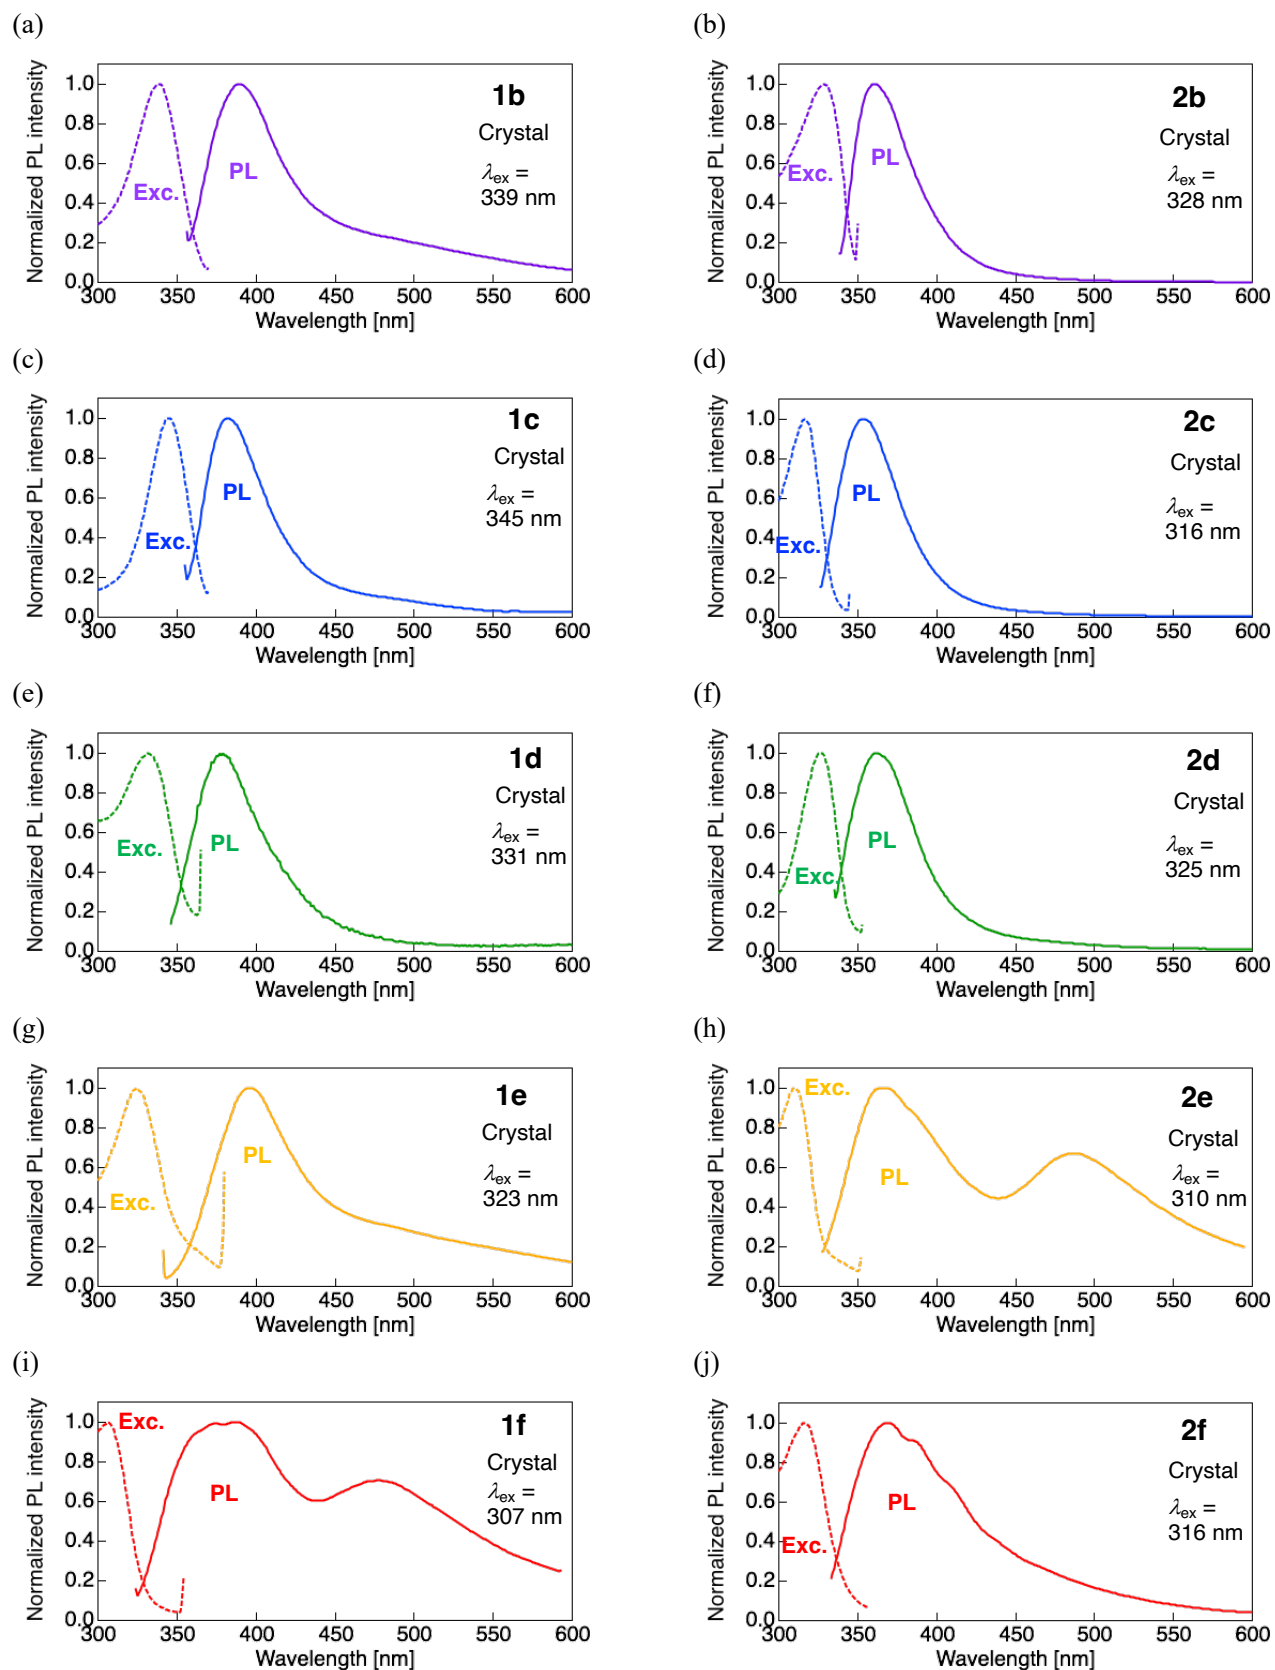

**Figure S43.** Excitation and PL spectra of (a) **1b**, (b) **2b**, (c) **1c**, (d) **2c**, (e) **1d**, (f) **2d**, (g) **1e**, (h) **2e**, (i) **1f**, (j) **2f** in crystalline state.

### Powder X-ray diffraction

Powder X-ray diffraction patterns were measured using an X-ray diffractometer (Rigaku MiniFlex600) equipped with an X-ray tube ( $\text{CuK}\alpha$ ,  $\lambda = 1.54 \text{ \AA}$ ) and semiconductor detector (D/teX Ultra2). The sample powder was mounted on a silicon non-reflecting plate, and the plate was set on a benchtop stage (Anton Paar, BTS-500).

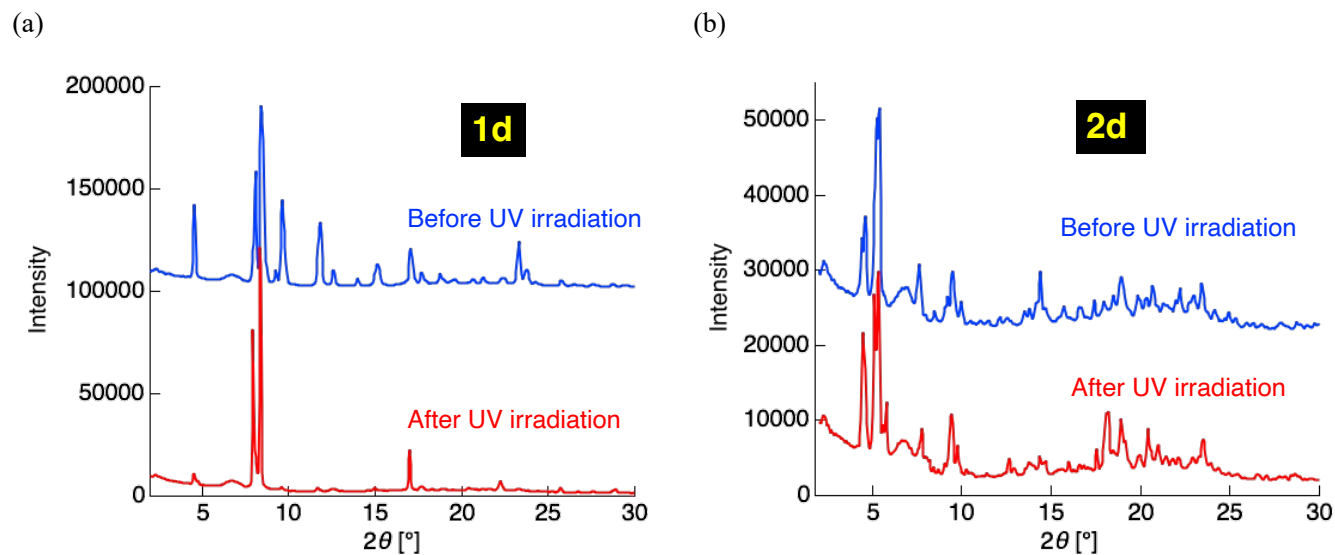

**Figure S44.** Powder X-ray diffraction pattern of (a) **1d** and (b) **2d** before and after UV irradiation.

## PL lifetime measurement

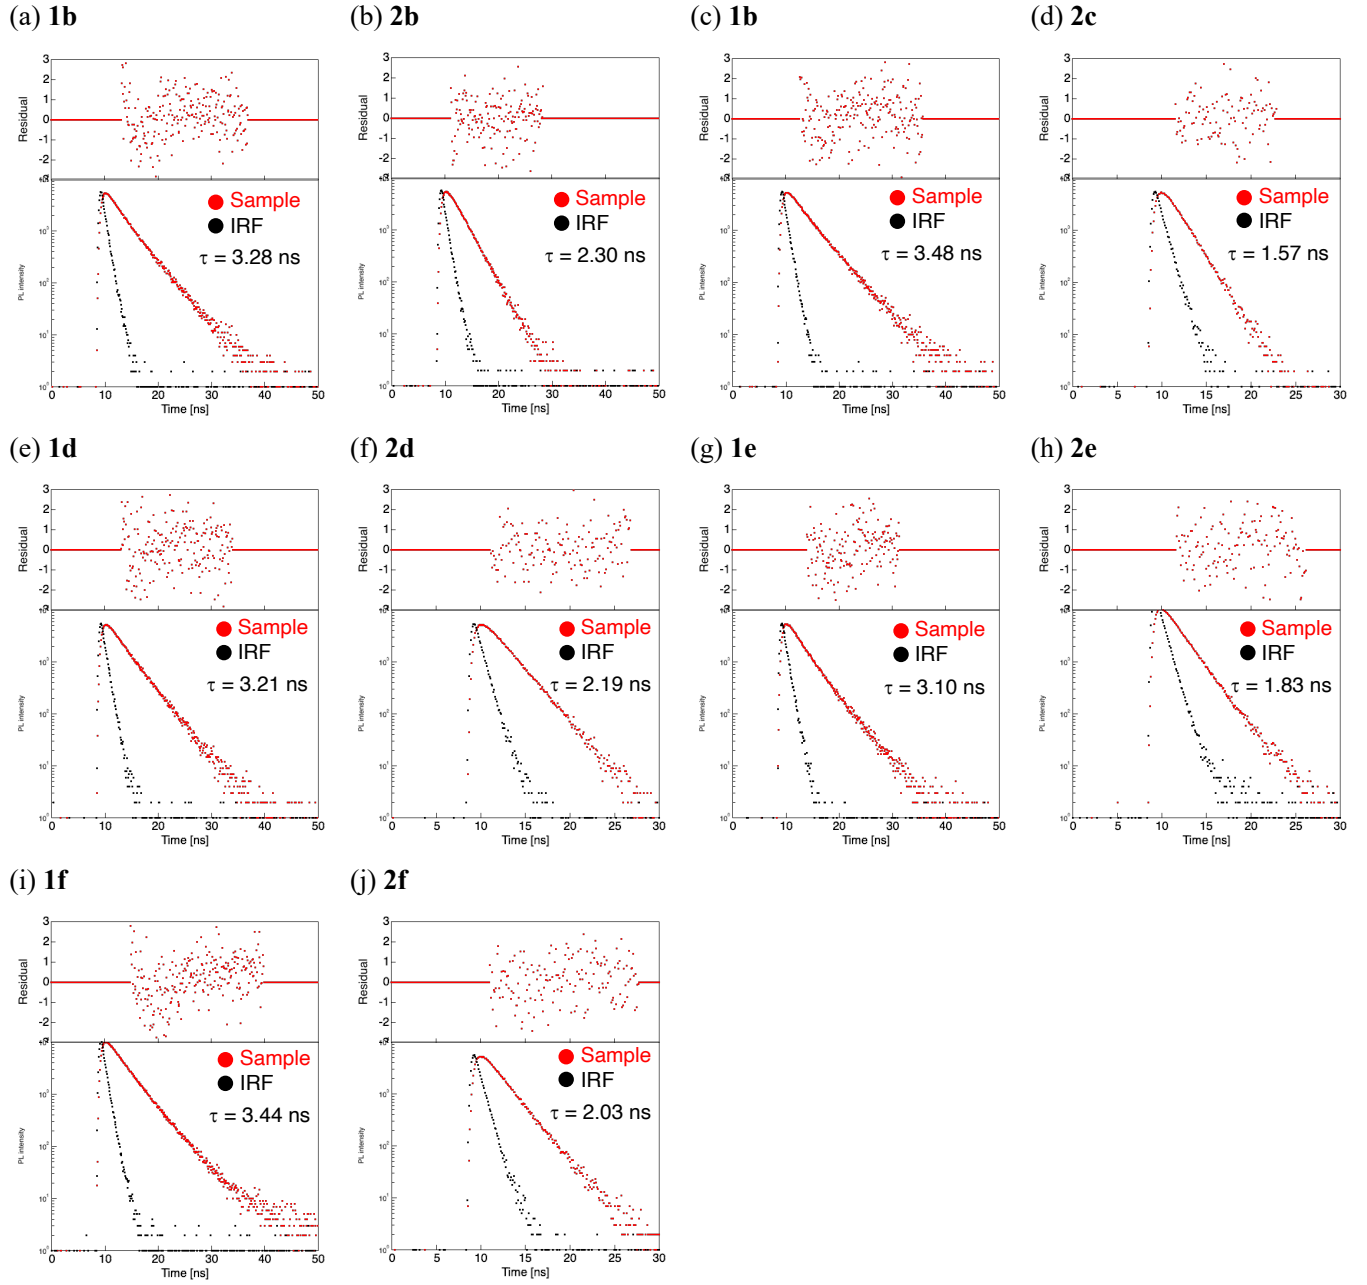

**Figure S45.** PL decay profile and residual from a single exponential fit for (a) 1b, (b) 2b, (c) 1c, (d) 2c, (e) 1d, (f) 2d, (g) 1e, (h) 2e, (i) 1f, (j) 2f in crystal.

## Theoretical study

Density functional theory (DFT) calculations were conducted using the Gaussian 16 (Rev. B.01) suite of programs (Gaussian, Wallingford, CT, USA), and geometry optimizations were performed at the M06-2X/6-311++G(d,p)//M06-2X/6-31+G(d,p) level of theory with an implicit solvation model, i.e., the conductor-like polarizable continuum model (CPCM), for CH<sub>2</sub>Cl<sub>2</sub>. Vertical electronic transitions were calculated using time-dependent DFT at the same level of theory, and geometry optimization at the S1 excited state was also performed at the same level of theory.

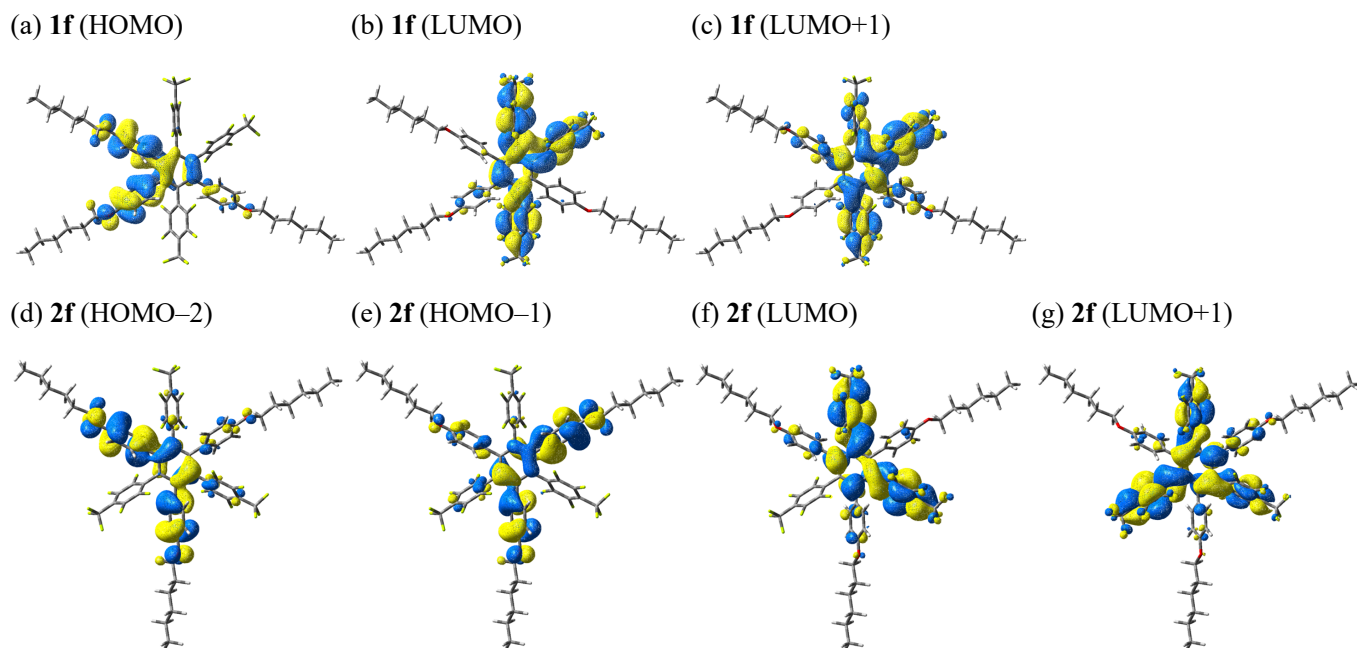

**Figure S46.** Molecular orbital distributions of (a) HOMO, (b) LUMO, and (c) LUMO+1 for **1b** and (d) HOMO–2, (e) HOMO–1, (f) LUMO, and (g) LUMO+1 for **2b**.

**Table S11.** Theoretical electronic transition calculated by TD-DFT method.

| Compound  | Theoretical electronic transition (Proportion, %) | $\lambda_{\text{calcd}}$ [nm] | $f$    |
|-----------|---------------------------------------------------|-------------------------------|--------|
| <b>1f</b> | HOMO $\rightarrow$ LUMO+1 (48.1%)                 | 275.1                         | 0.4475 |
| <b>2f</b> | HOMO–1 $\rightarrow$ LUMO+1 (24.2%)               | 269.4                         | 0.7058 |
|           | HOMO–2 $\rightarrow$ LUMO (23.9%)                 |                               |        |

**Table S12.** Cartesian coordinates of optimized geometry for **1f**.

| No. | Atom | Type | Coordinates (Angstroms) |           |           | 40 | 6 | 0 | 5.201151  | 0.983556  | -0.842357 |
|-----|------|------|-------------------------|-----------|-----------|----|---|---|-----------|-----------|-----------|
|     | No.  |      | x                       | y         | z         |    |   |   |           |           |           |
| 1   | 6    | 0    | 1.330122                | -1.055474 | 0.218047  | 42 | 6 | 0 | 5.638487  | 1.778443  | 0.221747  |
| 2   | 6    | 0    | 0.009391                | -1.523349 | 0.190865  | 43 | 1 | 0 | 5.115537  | 2.705333  | 2.086354  |
| 3   | 6    | 0    | -1.07188                | -0.633492 | 0.110122  | 44 | 1 | 0 | 5.859819  | 0.729116  | -1.663385 |
| 4   | 6    | 0    | -0.813969               | 0.748407  | 0.036744  | 45 | 6 | 0 | 2.454951  | -2.024944 | 0.32753   |
| 5   | 6    | 0    | 0.513765                | 1.203911  | 0.06023   | 46 | 6 | 0 | 3.259487  | -2.076936 | 1.463955  |
| 6   | 6    | 0    | 1.598426                | 0.318068  | 0.153289  | 47 | 6 | 0 | 2.747235  | -2.922768 | -0.691623 |
| 7   | 6    | 0    | -0.244717               | -2.990876 | 0.235482  | 48 | 6 | 0 | 4.304341  | -2.978445 | 1.564104  |
| 8   | 6    | 0    | 0.048271                | -3.749209 | 1.365867  | 49 | 6 | 0 | 3.792769  | -3.83425  | -0.601297 |
| 9   | 6    | 0    | -0.780668               | -3.666165 | -0.854643 | 50 | 6 | 0 | 4.592167  | -3.875144 | 0.536209  |
| 10  | 6    | 0    | -0.192159               | -5.11122  | 1.404716  | 51 | 8 | 0 | -5.006682 | 4.506661  | -0.455399 |
| 11  | 6    | 0    | -1.027569               | -5.033837 | -0.826857 | 52 | 8 | 0 | 6.890369  | 2.286323  | 0.330887  |
| 12  | 6    | 0    | -0.73542                | -5.78088  | 0.310217  | 53 | 6 | 0 | 7.828452  | 2.000466  | -0.704757 |
| 13  | 6    | 0    | -2.467444               | -1.157075 | 0.102262  | 54 | 1 | 0 | 7.441976  | 2.374744  | -1.662308 |
| 14  | 6    | 0    | -2.972672               | -1.856832 | 1.207023  | 55 | 9 | 0 | -0.122661 | 3.029982  | 2.140229  |
| 15  | 6    | 0    | -3.297417               | -0.968058 | -1.002137 | 56 | 9 | 0 | 0.331841  | 5.658644  | 1.989929  |
| 16  | 6    | 0    | -4.267834               | -2.352827 | 1.204444  | 57 | 9 | 0 | 2.208125  | 5.06699   | -2.317154 |
| 17  | 6    | 0    | -4.600753               | -1.464348 | -1.024354 | 58 | 9 | 0 | 1.721247  | 2.479578  | -2.165026 |
| 18  | 6    | 0    | -5.089528               | -2.1616   | 0.085465  | 59 | 9 | 0 | 2.016418  | -2.913804 | -1.811642 |
| 19  | 6    | 0    | -1.933209               | 1.727463  | -0.070303 | 60 | 9 | 0 | 3.995908  | -4.648272 | -1.635308 |
| 20  | 6    | 0    | -2.858188               | 1.872215  | 0.962739  | 61 | 9 | 0 | 3.021046  | -1.257552 | 2.488478  |
| 21  | 6    | 0    | -2.075646               | 2.525644  | -1.213977 | 62 | 9 | 0 | 5.043348  | -2.99154  | 2.674852  |
| 22  | 6    | 0    | -3.902314               | 2.793328  | 0.877969  | 63 | 6 | 0 | 1.502498  | 6.945864  | -0.158543 |
| 23  | 1    | 0    | -2.763517               | 1.261229  | 1.856459  | 64 | 9 | 0 | 0.341375  | 7.604148  | -0.006802 |
| 24  | 6    | 0    | -3.111506               | 3.441656  | -1.31811  | 65 | 9 | 0 | 2.068717  | 7.385875  | -1.283762 |
| 25  | 1    | 0    | -1.375264               | 2.416566  | -2.038663 | 66 | 9 | 0 | 2.295455  | 7.311553  | 0.862187  |
| 26  | 6    | 0    | -4.030108               | 3.583534  | -0.269038 | 67 | 9 | 0 | 6.893608  | -4.150608 | 0.918406  |
| 27  | 1    | 0    | -4.598062               | 2.883063  | 1.703051  | 68 | 9 | 0 | 5.926759  | -5.641056 | -0.309381 |
| 28  | 1    | 0    | -3.229693               | 4.056783  | -2.204079 | 69 | 9 | 0 | 5.559777  | -5.590474 | 1.817593  |
| 29  | 6    | 0    | 0.782693                | 2.668468  | -0.010839 | 70 | 6 | 0 | 5.747418  | -4.824865 | 0.730596  |
| 30  | 6    | 0    | 0.436825                | 3.522824  | 1.032401  | 71 | 8 | 0 | -6.338825 | -2.683766 | 0.170244  |
| 31  | 6    | 0    | 1.385293                | 3.244014  | -1.121825 | 72 | 1 | 0 | -2.922558 | -0.429076 | -1.868096 |
| 32  | 6    | 0    | 0.677591                | 4.883251  | 0.959882  | 73 | 1 | 0 | -5.214198 | -1.303447 | -1.902262 |
| 33  | 6    | 0    | 1.633742                | 4.608902  | -1.205882 | 74 | 1 | 0 | -4.66505  | -2.889361 | 2.059796  |
| 34  | 6    | 0    | 1.279112                | 5.455112  | -0.160033 | 75 | 1 | 0 | -2.348501 | -2.000864 | 2.085807  |
| 35  | 6    | 0    | 2.999502                | 0.823085  | 0.180186  | 76 | 1 | 0 | 7.96497   | 0.913695  | -0.785879 |
| 36  | 6    | 0    | 3.45391                 | 1.621223  | 1.24064   | 77 | 9 | 0 | -1.061487 | -3.001096 | -1.976167 |
| 37  | 6    | 0    | 3.887139                | 0.514201  | -0.850076 | 78 | 9 | 0 | -1.53956  | -5.592386 | -1.921869 |
| 38  | 6    | 0    | 4.756212                | 2.093644  | 1.265448  | 79 | 9 | 0 | 0.098565  | -5.789691 | 2.516086  |
| 39  | 1    | 0    | 2.783327                | 1.858061  | 2.063036  | 80 | 9 | 0 | 0.55911   | -3.156442 | 2.449874  |

|     |   |   |            |           |           |     |   |   |            |          |           |
|-----|---|---|------------|-----------|-----------|-----|---|---|------------|----------|-----------|
| 81  | 6 | 0 | -0.965148  | -7.266048 | 0.435674  | 110 | 6 | 0 | -7.988874  | 6.060477 | 1.204302  |
| 82  | 9 | 0 | 0.18484    | -7.906551 | 0.701654  | 111 | 1 | 0 | -8.54254   | 5.137206 | 1.422934  |
| 83  | 9 | 0 | -1.807327  | -7.535821 | 1.446432  | 112 | 1 | 0 | -7.500574  | 6.36177  | 2.141065  |
| 84  | 9 | 0 | -1.479269  | -7.805718 | -0.670654 | 113 | 6 | 0 | -8.973056  | 7.148167 | 0.778136  |
| 85  | 6 | 0 | -7.216239  | -2.519969 | -0.94156  | 114 | 1 | 0 | -8.419866  | 8.071454 | 0.556605  |
| 86  | 1 | 0 | -7.366274  | -1.449361 | -1.136069 | 115 | 1 | 0 | -9.463523  | 6.84756  | -0.158158 |
| 87  | 1 | 0 | -6.766432  | -2.975385 | -1.834133 | 116 | 6 | 0 | -10.038025 | 7.439952 | 1.833892  |
| 88  | 6 | 0 | -5.960907  | 4.698914  | 0.586495  | 117 | 1 | 0 | -10.588572 | 6.516435 | 2.054511  |
| 89  | 1 | 0 | -6.492604  | 3.756614  | 0.775785  | 118 | 1 | 0 | -9.545686  | 7.738735 | 2.768226  |
| 90  | 1 | 0 | -5.44238   | 4.996058  | 1.508059  | 119 | 6 | 0 | -11.015083 | 8.529263 | 1.396115  |
| 91  | 6 | 0 | -8.531086  | -3.193153 | -0.601479 | 120 | 1 | 0 | -11.536335 | 8.238192 | 0.478011  |
| 92  | 1 | 0 | -8.937514  | -2.739125 | 0.310238  | 121 | 1 | 0 | -11.769382 | 8.724774 | 2.163444  |
| 93  | 1 | 0 | -8.341884  | -4.250724 | -0.381706 | 122 | 1 | 0 | -10.487183 | 9.467692 | 1.196184  |
| 94  | 6 | 0 | -9.541675  | -3.069971 | -1.740843 | 123 | 6 | 0 | 9.135948   | 2.681112 | -0.35187  |
| 95  | 1 | 0 | -9.718709  | -2.008446 | -1.961252 | 124 | 1 | 0 | 8.957841   | 3.757698 | -0.243501 |
| 96  | 1 | 0 | -9.121142  | -3.51319  | -2.653774 | 125 | 1 | 0 | 9.479956   | 2.308578 | 0.620435  |
| 97  | 6 | 0 | -10.873611 | -3.746216 | -1.421299 | 126 | 6 | 0 | 10.20638   | 2.433977 | -1.413879 |
| 98  | 1 | 0 | -10.697627 | -4.808284 | -1.20086  | 127 | 1 | 0 | 10.370603  | 1.353509 | -1.525038 |
| 99  | 1 | 0 | -11.294968 | -3.304853 | -0.507392 | 128 | 1 | 0 | 9.848656   | 2.79784  | -2.386731 |
| 100 | 6 | 0 | -11.892327 | -3.628741 | -2.553632 | 129 | 6 | 0 | 11.533643  | 3.112686 | -1.080543 |
| 101 | 1 | 0 | -12.066614 | -2.567356 | -2.772117 | 130 | 1 | 0 | 11.370458  | 4.193554 | -0.968043 |
| 102 | 1 | 0 | -11.46848  | -4.068096 | -3.465743 | 131 | 1 | 0 | 11.892872  | 2.74973  | -0.107513 |
| 103 | 6 | 0 | -13.218484 | -4.310375 | -2.222495 | 132 | 6 | 0 | 12.610924  | 2.872997 | -2.136865 |
| 104 | 1 | 0 | -13.670563 | -3.868084 | -1.328428 | 133 | 1 | 0 | 12.771952  | 1.792996 | -2.247832 |
| 105 | 1 | 0 | -13.935065 | -4.216098 | -3.043232 | 134 | 1 | 0 | 12.249099  | 3.234459 | -3.108007 |
| 106 | 1 | 0 | -13.069051 | -5.377508 | -2.027014 | 135 | 6 | 0 | 13.932268  | 3.557627 | -1.792985 |
| 107 | 6 | 0 | -6.926352  | 5.779811  | 0.142637  | 136 | 1 | 0 | 14.690953  | 3.375259 | -2.559226 |
| 108 | 1 | 0 | -7.40527   | 5.466727  | -0.792874 | 137 | 1 | 0 | 13.797359  | 4.640761 | -1.703841 |
| 109 | 1 | 0 | -6.360919  | 6.694639  | -0.071559 | 138 | 1 | 0 | 14.323347  | 3.19101  | -0.838007 |

**Table S13.** Cartesian coordinates of optimized geometry for **2f**.

| No. | Atom | Type | Coordinates (Angstroms) |           |           | 40 | 6 | 0 | 3.643985  | 0.026648  | 1.419983  |
|-----|------|------|-------------------------|-----------|-----------|----|---|---|-----------|-----------|-----------|
|     | No.  |      | x                       | y         | z         | 41 | 6 | 0 | 3.506749  | -1.018462 | -0.741922 |
| 1   | 6    | 0    | 0.516384                | -1.29239  | 0.331027  | 42 | 6 | 0 | 5.016612  | -0.16245  | 1.429494  |
| 2   | 6    | 0    | -0.875356               | -1.112976 | 0.335063  | 43 | 1 | 0 | 3.162711  | 0.495113  | 2.275039  |
| 3   | 6    | 0    | -1.387198               | 0.193514  | 0.335     | 44 | 6 | 0 | 4.888306  | -1.213755 | -0.750253 |
| 4   | 6    | 0    | -0.536265               | 1.309132  | 0.330306  | 45 | 1 | 0 | 2.924406  | -1.34101  | -1.601582 |
| 5   | 6    | 0    | 0.851078                | 1.098925  | 0.326629  | 46 | 6 | 0 | 5.647942  | -0.78423  | 0.342483  |
| 6   | 6    | 0    | 1.391926                | -0.195927 | 0.328669  | 47 | 1 | 0 | 5.621166  | 0.158486  | 2.271295  |
| 7   | 6    | 0    | -1.791813               | -2.287648 | 0.34157   | 48 | 1 | 0 | 5.351004  | -1.690878 | -1.605218 |
| 8   | 6    | 0    | -1.812365               | -3.172456 | 1.429747  | 49 | 6 | 0 | 1.073959  | -2.673787 | 0.326016  |
| 9   | 6    | 0    | -2.64694                | -2.531272 | -0.732898 | 50 | 6 | 0 | 1.772424  | -3.182174 | 1.417802  |
| 10  | 6    | 0    | -2.664909               | -4.264944 | 1.439896  | 51 | 6 | 0 | 0.921608  | -3.514302 | -0.769235 |
| 11  | 1    | 0    | -1.165668               | -2.990531 | 2.284613  | 52 | 6 | 0 | 2.289485  | -4.46547  | 1.409016  |
| 12  | 6    | 0    | -3.509343               | -3.627967 | -0.740527 | 53 | 6 | 0 | 1.434288  | -4.805997 | -0.789166 |
| 13  | 1    | 0    | -2.633334               | -1.8663   | -1.593053 | 54 | 6 | 0 | 2.131167  | -5.304159 | 0.307082  |
| 14  | 6    | 0    | -3.519133               | -4.499983 | 0.352815  | 55 | 8 | 0 | -4.315966 | -5.592054 | 0.450491  |
| 15  | 1    | 0    | -2.690622               | -4.94837  | 2.28215   | 56 | 8 | 0 | -2.68227  | 6.53357   | 0.435737  |
| 16  | 1    | 0    | -4.153913               | -3.789298 | -1.595577 | 57 | 8 | 0 | 6.992286  | -0.92585  | 0.440756  |
| 17  | 6    | 0    | -2.862615               | 0.399356  | 0.339195  | 58 | 6 | 0 | -5.207509 | -5.876138 | -0.625955 |
| 18  | 6    | 0    | -3.642194               | 0.053158  | 1.439583  | 59 | 1 | 0 | -4.631618 | -6.020947 | -1.54991  |
| 19  | 6    | 0    | -3.525076               | 0.940429  | -0.755108 | 60 | 1 | 0 | -5.889251 | -5.027265 | -0.770669 |
| 20  | 6    | 0    | -5.013408               | 0.237053  | 1.438589  | 61 | 6 | 0 | -2.477422 | 7.447874  | -0.63957  |
| 21  | 6    | 0    | -4.90168                | 1.132074  | -0.767343 | 62 | 1 | 0 | -1.400301 | 7.604919  | -0.786379 |
| 22  | 6    | 0    | -5.671952               | 0.778837  | 0.336048  | 63 | 1 | 0 | -2.896666 | 7.027301  | -1.563462 |
| 23  | 6    | 0    | -1.095191               | 2.69021   | 0.332331  | 64 | 6 | 0 | 7.68591   | -1.562779 | -0.630392 |
| 24  | 6    | 0    | -1.843206               | 3.157188  | 1.423145  | 65 | 1 | 0 | 7.529323  | -0.995357 | -1.557648 |
| 25  | 6    | 0    | -0.884025               | 3.546825  | -0.747762 | 66 | 1 | 0 | 7.288893  | -2.576984 | -0.772076 |
| 26  | 6    | 0    | -2.359187               | 4.443262  | 1.43087   | 67 | 9 | 0 | -5.445157 | 1.651418  | -1.867294 |
| 27  | 1    | 0    | -2.004847               | 2.510862  | 2.282372  | 68 | 9 | 0 | -2.836093 | 1.271579  | -1.850915 |
| 28  | 6    | 0    | -1.399097               | 4.843457  | -0.757977 | 69 | 9 | 0 | -3.06486  | -0.451072 | 2.53311   |
| 29  | 1    | 0    | -0.321334               | 3.196974  | -1.609823 | 70 | 9 | 0 | -5.714489 | -0.105462 | 2.521573  |
| 30  | 6    | 0    | -2.140063               | 5.295167  | 0.338689  | 71 | 9 | 0 | 1.14231   | 2.895765  | 2.507388  |
| 31  | 1    | 0    | -2.931101               | 4.813125  | 2.275415  | 72 | 9 | 0 | 2.76611   | 5.017715  | 2.466883  |
| 32  | 1    | 0    | -1.220413               | 5.47816   | -1.617007 | 73 | 9 | 0 | 4.132907  | 3.861715  | -1.916632 |
| 33  | 6    | 0    | 1.767484                | 2.273474  | 0.316802  | 74 | 9 | 0 | 2.498316  | 1.793206  | -1.872659 |
| 34  | 6    | 0    | 1.863096                | 3.132295  | 1.408398  | 75 | 9 | 0 | 0.281436  | -3.077072 | -1.85741  |
| 35  | 6    | 0    | 2.561991                | 2.56575   | -0.784384 | 76 | 9 | 0 | 1.241117  | -5.53233  | -1.88918  |
| 36  | 6    | 0    | 2.708945                | 4.227058  | 1.392961  | 77 | 9 | 0 | 1.937119  | -2.433099 | 2.510948  |
| 37  | 6    | 0    | 3.417802                | 3.660586  | -0.810728 | 78 | 9 | 0 | 2.94642   | -4.907228 | 2.483694  |
| 38  | 6    | 0    | 3.503653                | 4.514256  | 0.284439  | 79 | 6 | 0 | -7.167821 | 0.945461  | 0.418537  |
| 39  | 6    | 0    | 2.867622                | -0.400449 | 0.332521  | 80 | 6 | 0 | 4.395906  | 5.727647  | 0.349372  |

|     |   |   |           |           |           |     |   |   |            |            |           |
|-----|---|---|-----------|-----------|-----------|-----|---|---|------------|------------|-----------|
| 81  | 6 | 0 | 2.723943  | -6.688146 | 0.381944  | 110 | 6 | 0 | -2.9929    | 9.80114    | -1.377387 |
| 82  | 9 | 0 | -7.695489 | 1.448347  | -0.699216 | 111 | 1 | 0 | -1.922692  | 9.985085   | -1.543379 |
| 83  | 9 | 0 | -7.504363 | 1.764835  | 1.428314  | 112 | 1 | 0 | -3.394498  | 9.414686   | -2.324034 |
| 84  | 9 | 0 | -7.768708 | -0.232601 | 0.653849  | 113 | 6 | 0 | -3.683587  | 11.121113  | -1.039694 |
| 85  | 9 | 0 | 3.673259  | 6.844097  | 0.539581  | 114 | 1 | 0 | -4.754789  | 10.93876   | -0.875885 |
| 86  | 9 | 0 | 5.116732  | 5.900874  | -0.760211 | 115 | 1 | 0 | -3.285475  | 11.5068    | -0.09084  |
| 87  | 9 | 0 | 5.254625  | 5.637143  | 1.378206  | 116 | 6 | 0 | -3.513194  | 12.181772  | -2.125819 |
| 88  | 9 | 0 | 4.050848  | -6.631002 | 0.583463  | 117 | 1 | 0 | -2.442709  | 12.362315  | -2.28742  |
| 89  | 9 | 0 | 2.517082  | -7.40105  | -0.726887 | 118 | 1 | 0 | -3.909127  | 11.793658  | -3.073058 |
| 90  | 9 | 0 | 2.201781  | -7.378745 | 1.408877  | 119 | 6 | 0 | -4.209616  | 13.495613  | -1.77688  |
| 91  | 6 | 0 | 9.157674  | -1.608262 | -0.270963 | 120 | 1 | 0 | -4.076937  | 14.242614  | -2.564525 |
| 92  | 1 | 0 | 9.514472  | -0.584948 | -0.103684 | 121 | 1 | 0 | -5.284755  | 13.340814  | -1.637401 |
| 93  | 1 | 0 | 9.275482  | -2.152483 | 0.673742  | 122 | 1 | 0 | -3.809757  | 13.912644  | -0.846552 |
| 94  | 6 | 0 | 9.98731   | -2.277608 | -1.365599 | 123 | 6 | 0 | -5.981109  | -7.131102  | -0.273909 |
| 95  | 1 | 0 | 9.613402  | -3.295953 | -1.538502 | 124 | 1 | 0 | -5.271891  | -7.949988  | -0.10396  |
| 96  | 1 | 0 | 9.857372  | -1.731924 | -2.310108 | 125 | 1 | 0 | -6.51836   | -6.965037  | 0.6675    |
| 97  | 6 | 0 | 11.474166 | -2.339788 | -1.020896 | 126 | 6 | 0 | -6.966628  | -7.514715  | -1.376746 |
| 98  | 1 | 0 | 11.849135 | -1.321863 | -0.845441 | 127 | 1 | 0 | -7.664395  | -6.684228  | -1.55038  |
| 99  | 1 | 0 | 11.605028 | -2.886172 | -0.076486 | 128 | 1 | 0 | -6.42198   | -7.667744  | -2.31839  |
| 100 | 6 | 0 | 12.314502 | -3.005772 | -2.10902  | 129 | 6 | 0 | -7.760396  | -8.776855  | -1.044486 |
| 101 | 1 | 0 | 11.936592 | -4.021175 | -2.284464 | 130 | 1 | 0 | -7.063728  | -9.608268  | -0.868593 |
| 102 | 1 | 0 | 12.182701 | -2.458215 | -3.051075 | 131 | 1 | 0 | -8.306887  | -8.624947  | -0.103313 |
| 103 | 6 | 0 | 13.798208 | -3.063739 | -1.750905 | 132 | 6 | 0 | -8.747093  | -9.169816  | -2.142546 |
| 104 | 1 | 0 | 14.384144 | -3.542355 | -2.540581 | 133 | 1 | 0 | -9.440728  | -8.337428  | -2.317577 |
| 105 | 1 | 0 | 14.200547 | -2.056994 | -1.596227 | 134 | 1 | 0 | -8.199052  | -9.31998   | -3.081566 |
| 106 | 1 | 0 | 13.953235 | -3.629991 | -0.82643  | 135 | 6 | 0 | -9.534967  | -10.432485 | -1.799192 |
| 107 | 6 | 0 | -3.165843 | 8.750028  | -0.282014 | 136 | 1 | 0 | -10.235413 | -10.698369 | -2.595856 |
| 108 | 1 | 0 | -4.231926 | 8.554441  | -0.115448 | 137 | 1 | 0 | -8.86095   | -11.281957 | -1.646111 |
| 109 | 1 | 0 | -2.751919 | 9.122547  | 0.662642  | 138 | 1 | 0 | -10.110206 | -10.293547 | -0.877718 |
